# Supplementary material for: Structure–property relationships in a series of diglycerol tetraether model lipids and their lyotropic assemblies: the effect of branching topology and chirality
Source: Royal Society of Chemistry journal article supplement (doi:10.1039/c4ob00048j), 2014-01-01
Supplement: c4ob00048j1.pdf [file c4ob00048j1.pdf]

## Electronic Supplementary Material

---

### ***Structure-properties relationships in a series of diglycerol tetraether model lipids and their lyotropic assemblies: Effect of branching topology and chirality***

*Thomas Markowski,<sup>a</sup> Simon Drescher,\*<sup>a</sup> Annette Meister,<sup>b</sup> Alfred Blume<sup>c</sup> and Bodo Dobner\*<sup>a</sup>*

<sup>a</sup> Martin-Luther-Universitaet (MLU) Halle-Wittenberg, Institute of Pharmacy,  
Wolfgang-Langenbeck-Str. 4, 06120 Halle (Saale), Germany;  
S.D. Fax: +49(0) 345 5527026; Tel: +49(0) 345 5525196;  
E-mail: simon.drescher@pharmazie.uni-halle.de  
B.D. Fax: +49(0) 345 5527018; Tel: +49(0) 345 5525120;  
E-mail: bodo.dobner@pharmazie.uni-halle.de

<sup>b</sup> Center for structure and dynamics of proteins (MZIP), Biocenter, MLU Halle-Wittenberg,  
Weinbergweg 22, 06120 Halle (Saale), Germany;

<sup>c</sup> MLU Halle-Wittenberg, Institute of Chemistry, von-Danckelmann-Platz 4, 06120 Halle (Saale),  
Germany.

---

#### Content:

|                                                                                                       |         |
|-------------------------------------------------------------------------------------------------------|---------|
| 1. Multiple tritylation reaction on 3,3'-O,O-(alkane-1,3,2-diyl)bis(sn-glycerol)s ( <b>24</b> ) ..... | 2       |
| 2. DLS measurements .....                                                                             | 6 – 7   |
| 3. Syntheses of compounds .....                                                                       | 8 – 13  |
| 4. Characterisation of products – MS, <sup>1</sup> H NMR, <sup>13</sup> C NMR spectra .....           | 14 – 78 |
| 5. References .....                                                                                   | 79      |

# 1. Multiple tritylation reaction on 3,3'-O,O-(alkane-1,32-diyl)bis(*sn*-glycerol)s (24)

## Reaction scheme:

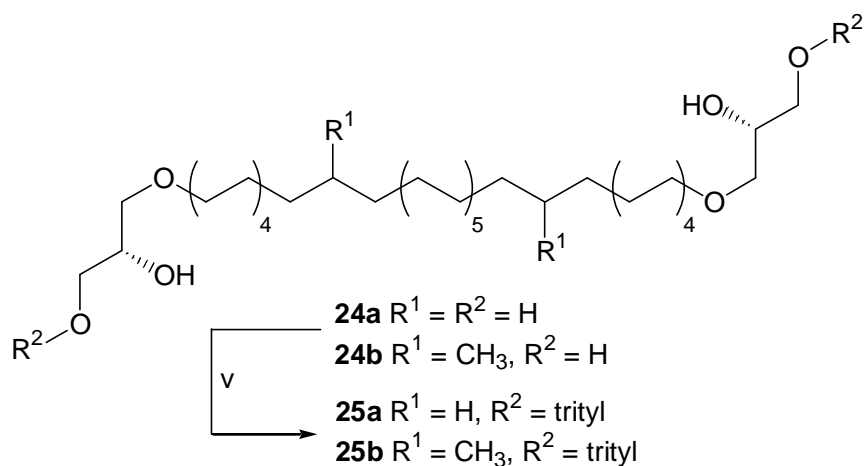

## Reaction of **24a**:

main product with 2 trityl moieties (compound **25a**):  $C_{76}H_{106}O_6$  MW = 1,115.65 g mol<sup>-1</sup>

side-product with 3 trityl moieties:  
 $C_{95}H_{120}O_6$  MW = 1,357.96 g mol<sup>-1</sup>  
 $C_{95}H_{119}O_6Na$  MW = 1,379.94 g mol<sup>-1</sup>

side product with 4 trityl moieties:  
 $C_{114}H_{134}O_6$  MW = 1,600.27 g mol<sup>-1</sup>  
 $C_{114}H_{134}O_6Na$  MW = 1,623.26 g mol<sup>-1</sup>

## Reaction of **24b**:

main product with 2 trityl moieties (compound **25b**):  $C_{78}H_{110}O_6$  MW = 1,143.70 g mol<sup>-1</sup>

side-product with 3 trityl moieties:  
 $C_{97}H_{124}O_6$  MW = 1,386.01 g mol<sup>-1</sup>  
 $C_{97}H_{123}O_6Na$  MW = 1,408.00 g mol<sup>-1</sup>



ESI-MS, positive mode side-product of **25a** with 3 trityl moieties

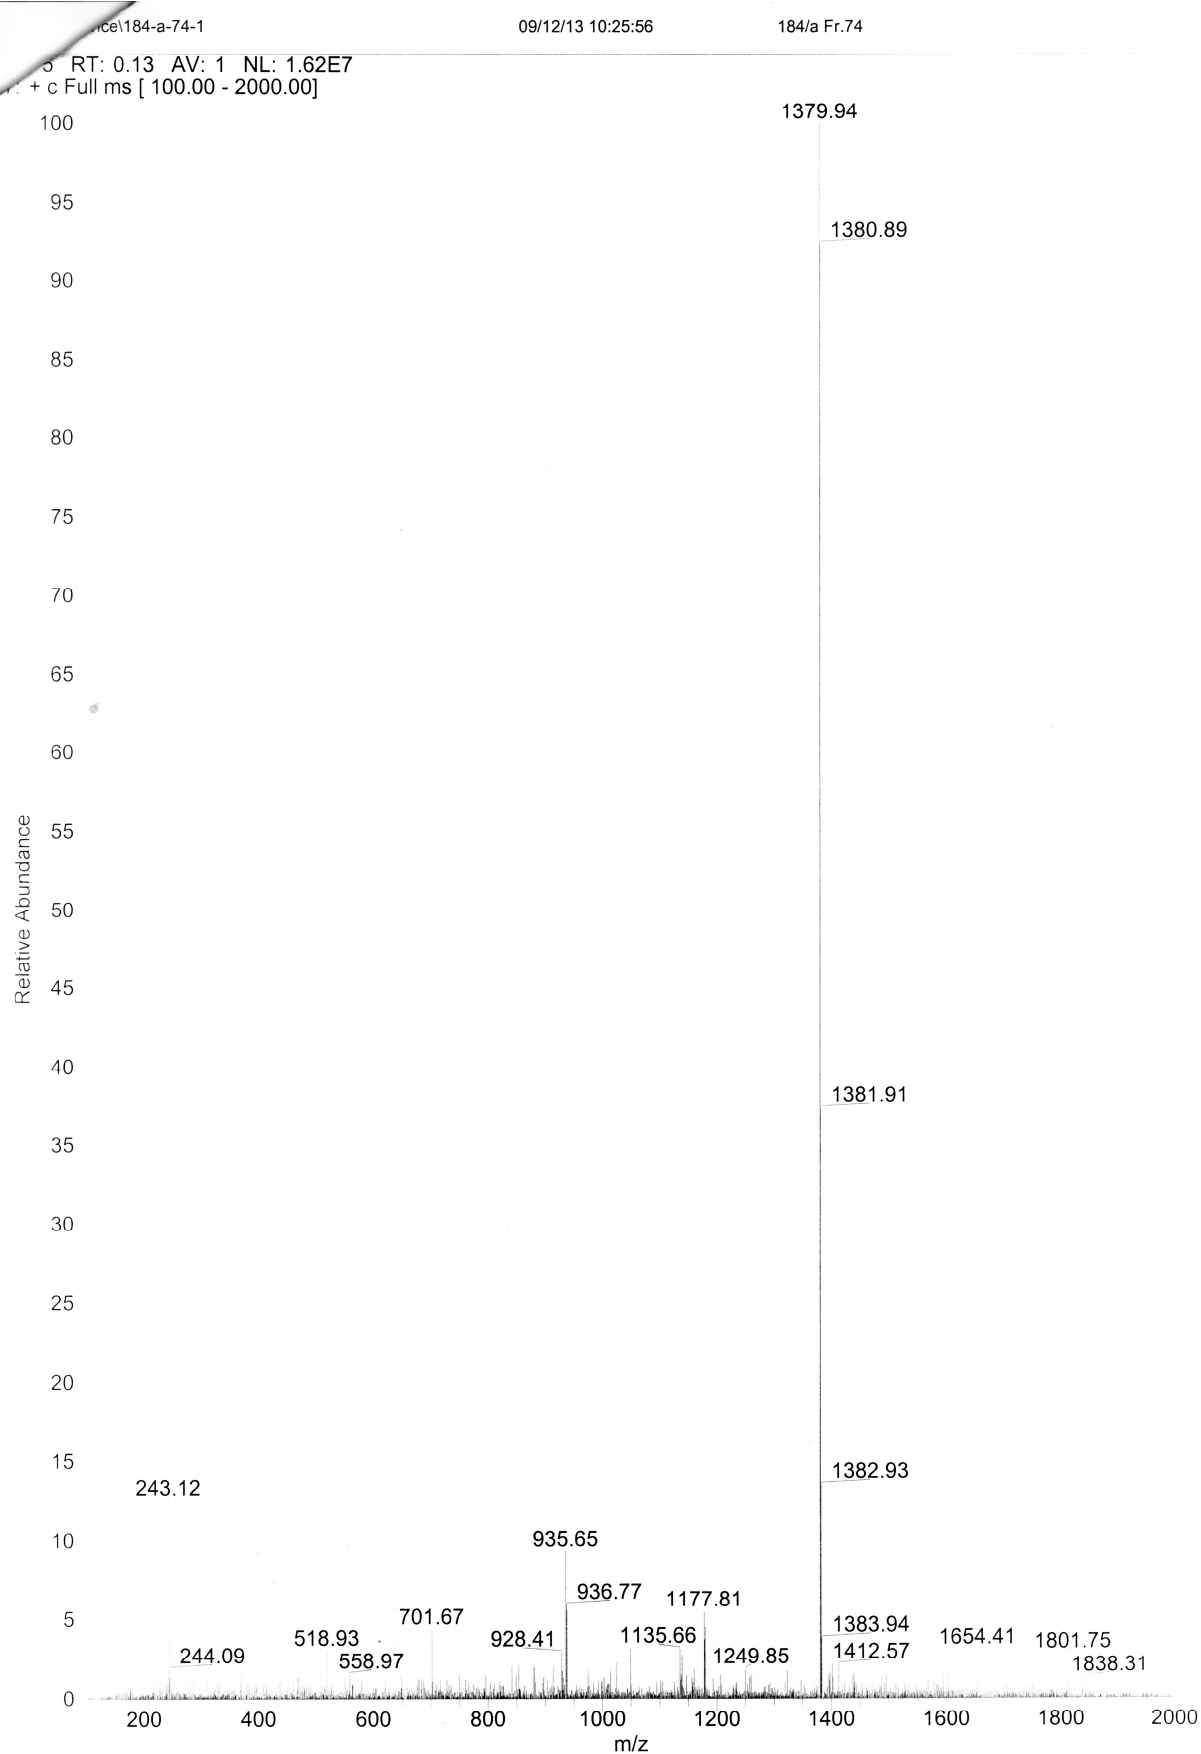

ESI-MS, positive mode side-product of **25a** with 4 trityl moieties

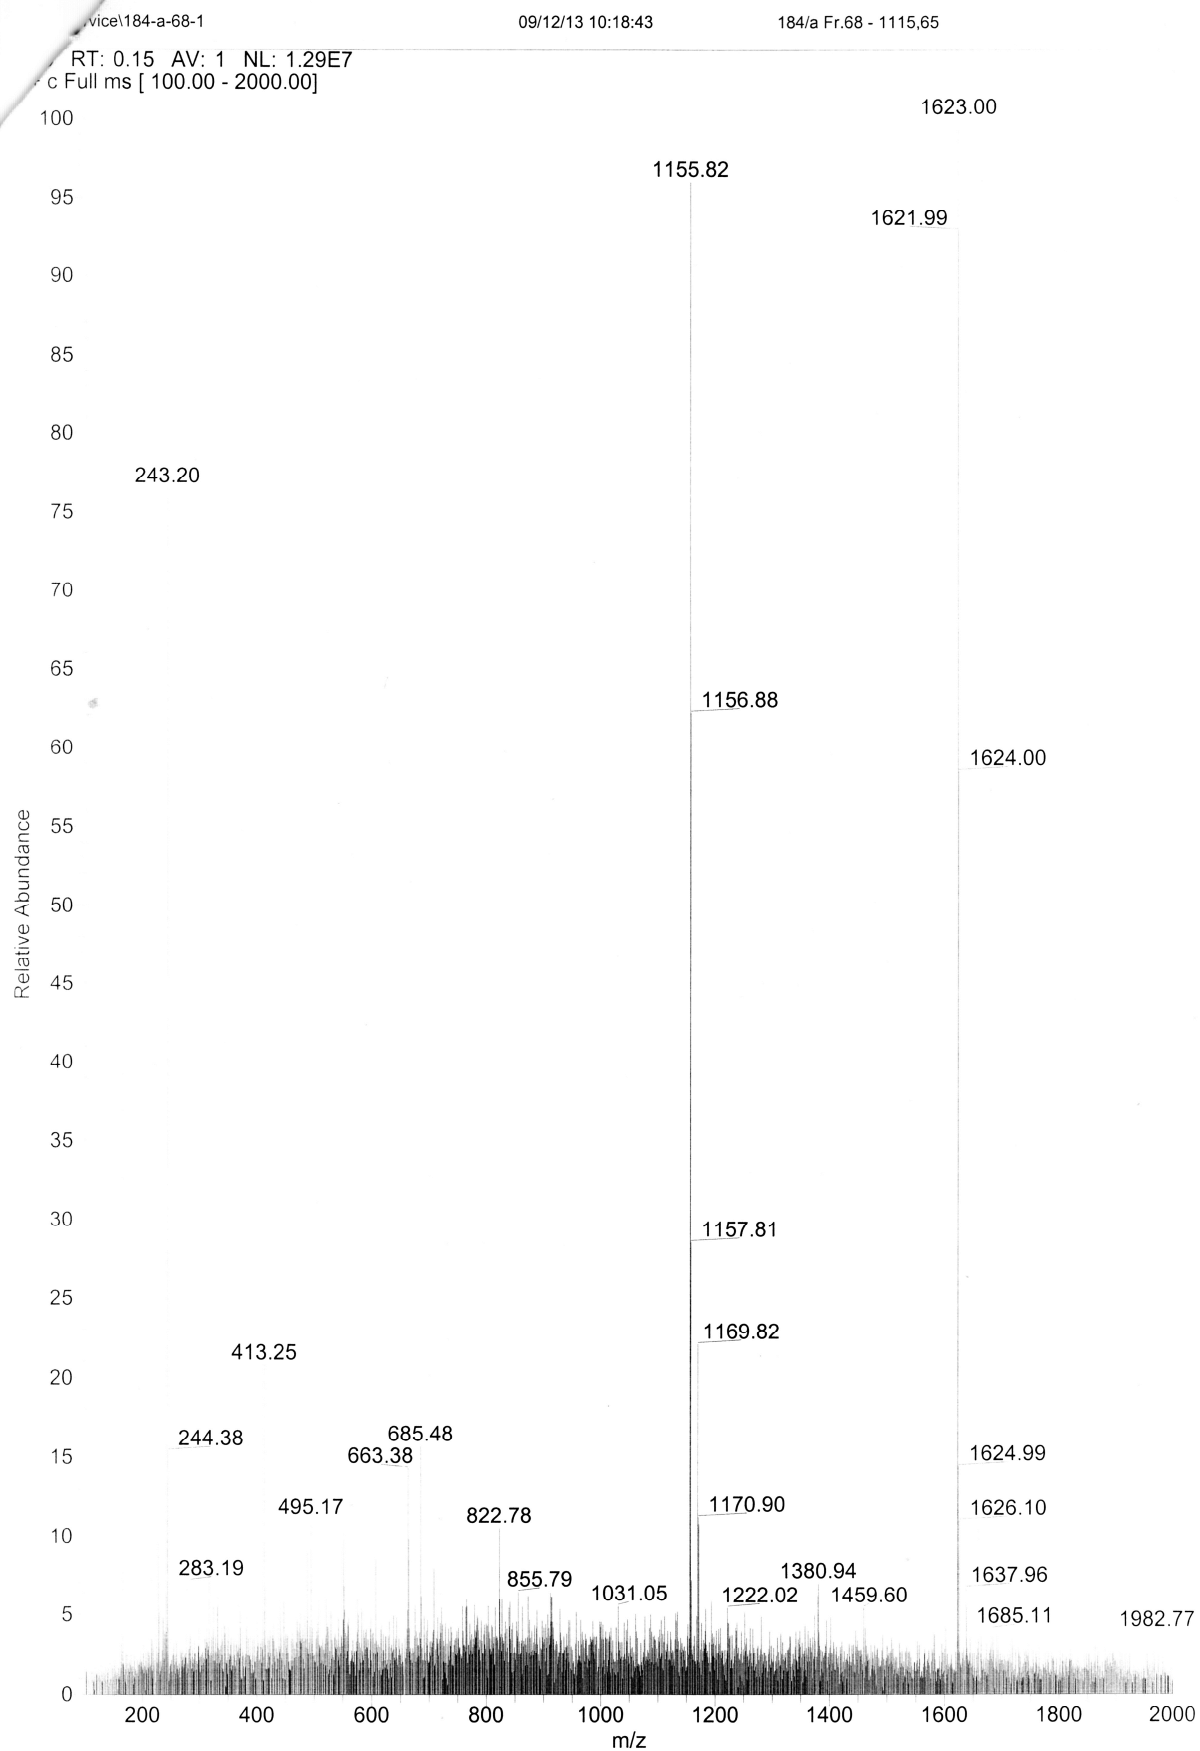

*ESI-MS, positive mode side-product of 25b with 3 trityl moieties*

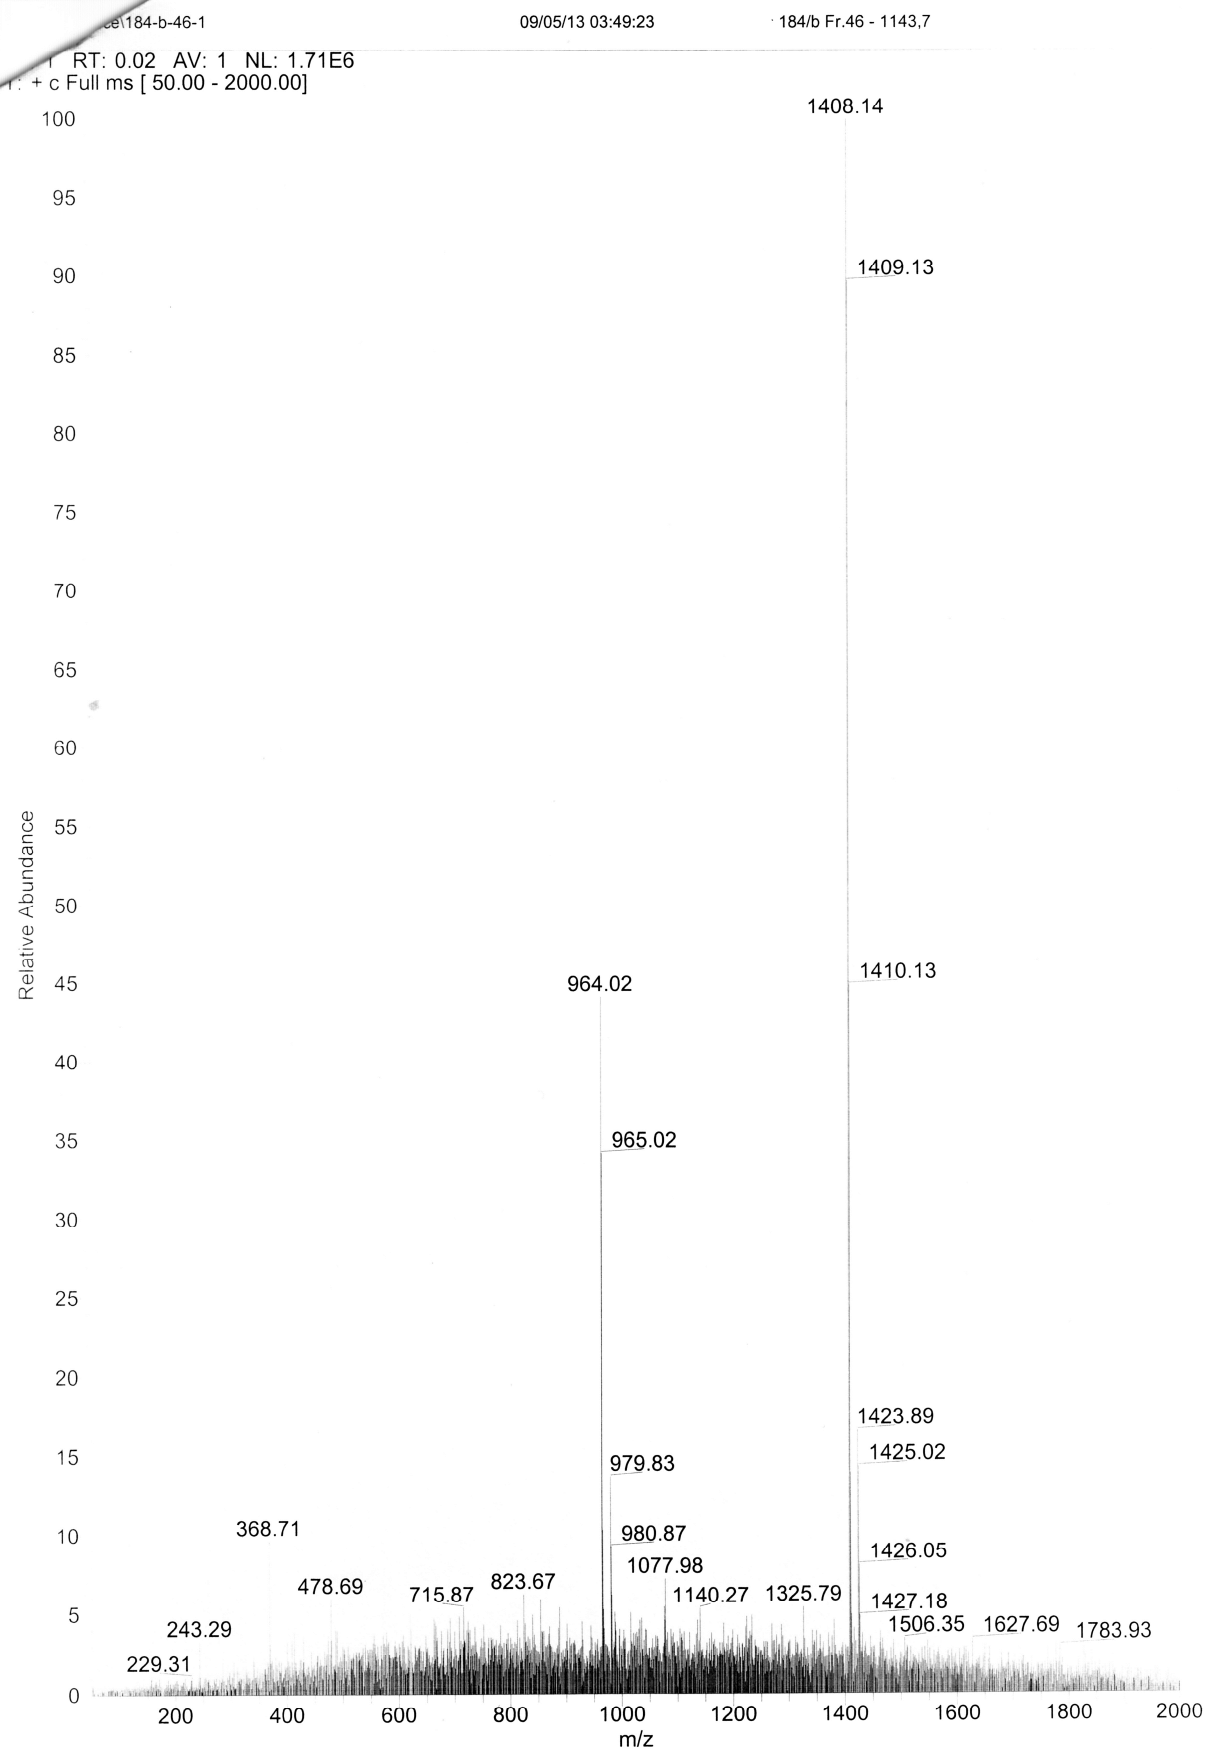

## 2. DLS measurements

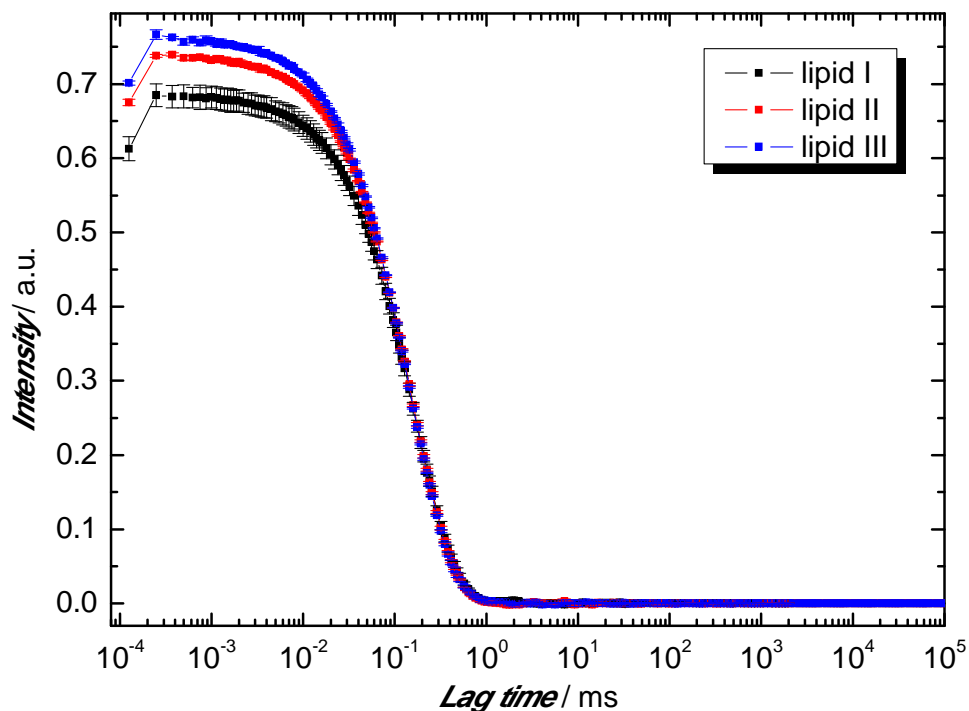

**Figure S1:** Intensity correlation function of liposomes prepared from aqueous lipid suspensions ( $c = 1 \text{ mg mL}^{-1}$ ) using the technique described by Bangham et al.<sup>1</sup> ( $n = 3$ ). DLS measurements were performed directly after preparation.

Correlation data were fitted using ALV-Regularized Fit (model: *DLS-Exponential* ( $g_2(t)$ ), lag time = 1 – 512  $\mu\text{s}$ , min decay time = 0.001 ms, max decay time = 1000 ms)

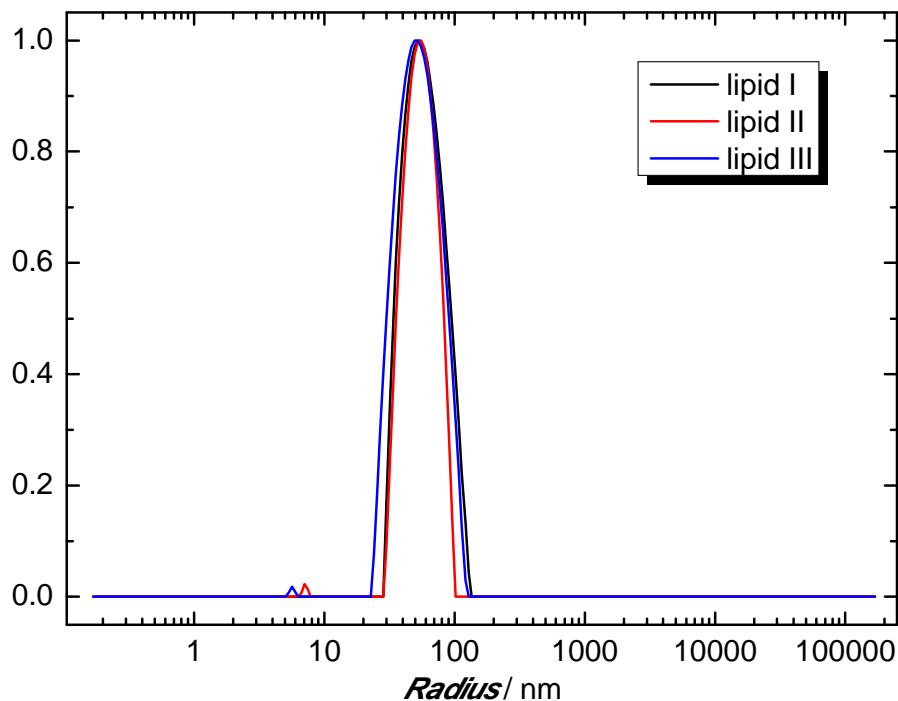

**Figure S2:** Unweighted (logarithmic) size distribution of liposomes prepared from aqueous lipid suspensions ( $c = 1 \text{ mg mL}^{-1}$ ) using the technique described by Bangham et al.<sup>1</sup> ( $n = 3$ ).

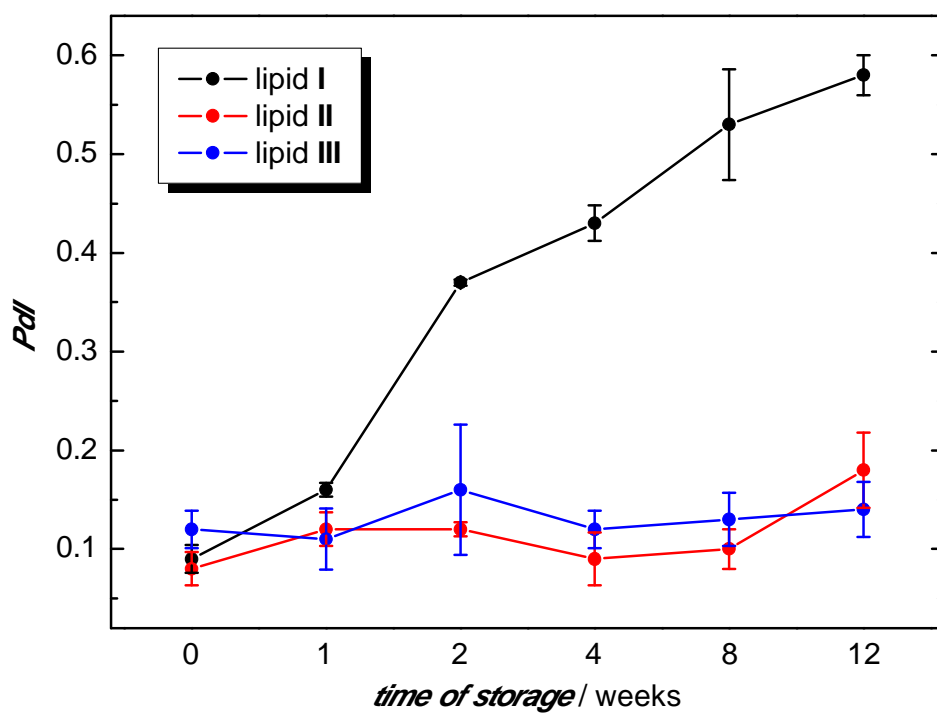

**Figure S3:** PdI values of liposomes prepared from aqueous lipid suspensions ( $c = 1 \text{ mg mL}^{-1}$ ) using the technique described by Bangham et al.<sup>1</sup> after different time of storage ( $n = 3$ ).

### 3. Syntheses of compounds

#### *Synthesis of methyl-branched bromoalkanes – the malonic ester pathway*

**Hexyl(methyl)malonic acid diethyl ester (2a).** To a suspension of NaH (60%, 12.0 g, 0.3 mol) in dry toluene (300 mL) was added a solution of methyl malonic acid diethyl ester (**1**; 52.3 g, 0.3 mol) in dry toluene (50 mL). After the salt formation was complete 1-bromohexane (57.8 g, 0.35 mol) was added and the mixture was stirred under reflux for 8 h. After common work up the crude hexyl(methyl)malonic acid diethyl ester (**2a**) was purified by vacuum distillation yielding a colourless liquid (64.3 g, 83%). K.p. (0.5 kPa) 93–95 °C; C<sub>14</sub>H<sub>26</sub>O<sub>4</sub> requires C, 65.08; H, 10.15; found: C, 65.03; H, 10.23%; <sup>1</sup>H NMR (400 MHz; CDCl<sub>3</sub>) δ 0.85 (t, *J* = 6.9 Hz, 3 H, (CH<sub>2</sub>)<sub>5</sub>CH<sub>3</sub>), 1.15–1.35 (m, 14 H, CH<sub>2</sub>, OCH<sub>2</sub>CH<sub>3</sub>), 1.40 (s, 3 H, CCH<sub>3</sub>), 1.80–1.85 (m, 2 H, H<sub>3</sub>C(CH<sub>2</sub>)<sub>4</sub>CH<sub>2</sub>), 4.15–4.21 (m, 4 H, OCH<sub>2</sub>CH<sub>3</sub>); EI-MS *m/z* 213 (18%, M – OC<sub>2</sub>H<sub>5</sub>), 185 (20, M – COOC<sub>2</sub>H<sub>5</sub>), 174 (100, M – C<sub>6</sub>H<sub>12</sub>). The data are in agreement with published values.<sup>2</sup>

**Hexyl(methyl)malonic acid (3a).** Compound **2a** (46.6 g, 0.2 mol) and potassium hydroxide (33.0 g, 0.6 mol) were dissolved in water (145 mL) and EtOH (300 mL), and were heated under reflux for 6 h. The alcoholic portion was removed mainly in vacuum. The residue was mixed with water (150 mL), extracted two times with Et<sub>2</sub>O (50 mL) and acidified with ice-cold aqueous HCl to a final pH value of 2. The precipitate was collected and recrystallised from heptane yielding a white solid substance (32.4 g, 80%). M.p. 133–134 °C; C<sub>10</sub>H<sub>18</sub>O<sub>4</sub> requires C, 59.38; H, 8.97; found: C, 59.61; H, 8.73%; <sup>1</sup>H NMR (400 MHz; CDCl<sub>3</sub>) δ 0.88 (t, *J* = 6.9 Hz, 3 H, CH<sub>2</sub>CH<sub>3</sub>), 1.10–1.50 (m, 8 H, CH<sub>2</sub>) 1.54 (s, 3 H, CCH<sub>3</sub>), 1.87–1.94 (m, 2 H, H<sub>3</sub>C(CH<sub>2</sub>)<sub>4</sub>CH<sub>2</sub>). The data are in agreement with published values.<sup>3</sup>

**(2RS)-2-Methyloctanoic acid (4a).** The hexyl(methyl)malonic acid (**3a**; 30.3 g, 0.15 mol) was heated up to 180 °C within 2 h. When the CO<sub>2</sub> evolution was finished the crude acid was distilled in vacuum yielding colourless oil (23.0 g, 97%). Kp (0.4 kPa) 94 °C; C<sub>9</sub>H<sub>18</sub>O<sub>2</sub> requires C, 68.31; H, 11.46; found: C, 68.56; H, 11.37%; <sup>1</sup>H NMR (400 MHz; CDCl<sub>3</sub>) δ 0.88 (t, *J* = 6.4 Hz, 3 H, CH<sub>2</sub>CH<sub>3</sub>), 1.17 (d, *J* = 6.9 Hz, 3 H, CHCH<sub>3</sub>), 1.21–1.40 (m, 8 H, CH<sub>2</sub>), 1.39–1.46 and 1.64–1.71 (2 m, 2 H, CH<sub>2</sub>CH), 2.41–2.48 (m, 1 H, CHCH<sub>3</sub>); EI-MS *m/z* 158 (28%, M), 129 (68, M – C<sub>2</sub>H<sub>5</sub>). The data are in agreement with published values.<sup>4</sup>

**(2RS)-2-Methyloctan-1-ol (5a).** 2-Methyloctanoic acid (**4a**; 25.0 g, 0.158 mol) were heated with MeOH (130 mL, 4 mol) and conc. H<sub>2</sub>SO<sub>4</sub> (5 mL, 28 mmol) for 2 h under reflux. The mixture was evaporated to the half of the original volume. Water (100 mL) was added and the mixture was extracted two times with Et<sub>2</sub>O (100 mL). The combined ethereal extracts were washed with conc. sodium acetate solution (50 mL) and water (100 mL). After drying over Na<sub>2</sub>SO<sub>4</sub> the solvent was removed in vacuum. The crude methyl ester was reduced to 2-methyloctanol (**5a**) without further purification. Therefore, the ester was dissolved in dry Et<sub>2</sub>O (100 mL) and dropped into a stirred mixture of lithium aluminium hydride (7.12 g, 0.188 mol) in dry Et<sub>2</sub>O (150 mL). The mixture was heated for 2 h under reflux. After the generally work up procedure with water, acidification,

separation and drying, the solvent was evaporated and the residue was purified by chromatography yielding colourless liquid (18.0 g, 79%);  $C_9H_{20}O$  requires C, 74.93; H, 3.98; found: C, 74.70; H, 13.96%;  $^1H$  NMR (400 MHz;  $CDCl_3$ )  $\delta$  0.84–0.90 (m, 6 H,  $2 \times CH_3$ ), 1.05–1.10 (m, 2 H,  $CH_2$ ), 1.17–1.40 (m, 8 H,  $CH_2$ ), 1.54–1.62 (m, 1 H,  $CH$ ), 3.37–3.50 (m, 2 H,  $CH_2OH$ ); EI-MS  $m/z$  144 (M), 143 (M – H), 129 (M –  $CH_3$ ). The data are in agreement with published values.<sup>5</sup>

**(2*RS*)-1-Bromo-2-methyloctane (6a).** 2-Methyloctan-1-ol (**5a**; 17.31 g, 0.12 mol) and TEA (13.2 g, 0.13 mol) were dissolved in dry  $CHCl_3$  (150 mL). Methansulphonic acid chloride (14.89 g, 0.13 mol) diluted in dry  $CHCl_3$  (50 mL) was added drop wise at 0 °C. The mixture was stirred for 1 h at that temperature and then at r.t. overnight. The solution was poured into ice (200 mL) and the organic layer was separated. The water phase was extracted two times with  $CHCl_3$  (100 mL) and the collected organic layers were dried over  $Na_2SO_4$ . The solvent was removed under reduced pressure and residue was taken up in dry acetone (100 mL). LiBr (18 g, 0.2 mol) was added in one portion and the mixture was stirred for 6–8 h (TLC control) under reflux. Afterwards, the mixture was concentrated to 50 mL, ice water (150 mL) was added and the mixture was extracted three times with petrol ether (50 mL). After drying the organic layers with  $Na_2SO_4$ , the solvent was removed and the residue was purified by column chromatography using heptane/ $Et_2O$  as eluent and gradient technique yielding colourless oil (16.9 g, 68%).  $C_9H_{19}Br$  requires C, 52.18; H, 9.25; found: C, 52.26; H, 9.38%;  $^1H$  NMR (400 MHz;  $CDCl_3$ )  $\delta$  0.80 (t,  $J$  = 6.9 Hz, 3 H,  $CH_2CH_3$ ), 0.94 (d,  $J$  = 6.5 Hz, 2 H,  $CHCH_3$ ), 1.10–1.45 (m, 10 H,  $CH_2$ ), 1.65–1.78 (m, 1 H,  $CH$ ), 3.20–3.35 (m, 2 H,  $BrCH_2$ ); EI-MS  $m/z$  206/208 (3.5%, M). The data are in agreement with published values.<sup>3</sup>

### *Synthesis of methyl-branched bromoalkanes – the citronellyl bromide pathway*

**(4*RS*)-6-Bromo-4-methylhexan-1-ol (9).** Compound **9** was synthesised from (*RS*)-citronellyl bromide (**8**) according to the procedure described previously.<sup>6</sup> The crude alcohol **9** was used for the subsequently performed blocking of the hydroxyl moiety.

**2-[[*(4RS)*-6-Bromo-4-methylhexyl]oxy]tetrahydro-2*H*-pyran (10).** Compound **9** (7.8 g, 40 mmol) was dissolved in  $CH_2Cl_2$  (50 mL), 3,4-dihydro-2*H*-pyran (5.04 g, 60 mmol) and PPTS (0.1 g) were added and the mixture was stirred for 18 h at r.t. Afterwards, the solution was washed with water (50 mL), dried with  $Na_2SO_4$ , evaporated and the residue was purified by column chromatography using heptane/ $Et_2O$  as eluent yielding **10** (10.6 g, 95%), colourless liquid.  $C_{12}H_{23}O_2Br$  requires C, 51.62; H, 8.30; found: C, 51.56; H, 8.28%;  $^1H$  NMR (400 MHz;  $CDCl_3$ )  $\delta$  0.88 (d,  $J$  = 5.8 Hz, 3 H,  $CH_3$ ), 1.14–1.25 (m, 1 H,  $CH_2CH(CH_2)_2Br$ ), 1.32–1.43 (m, 1 H,  $CH_2CH(CH_2)_2Br$ ), 1.47–1.72 (m, 9 H,  $2 \times CH_2CH_2O$ ,  $CH_2CH_2CHO$ ,  $CHCH_3$ ), 1.76–1.91 (m, 2 H,  $CH_2CH_2Br$ ), 3.32–3.50 (m, 4 H,  $CH_2Br$ ,  $2 \times CHOCHH$ ), 3.66–3.73 (m, 1 H,  $CHOCHH$ ), 3.81–3.87 (m, 1 H,  $CHOCHH$ ), 4.53–4.55 (m, 1 H,  $OCHO$ ); EI-MS  $m/z$  277/279 (5%, M).

**2-[[*(4RS)*-4-Methylundec-10-en-1-yl]oxy]tetrahydro-2*H*-pyran (11).** Bromopent-1-ene (16.4 g, 0.11 mol), dissolved in dry  $Et_2O$  (70 mL), was slowly added to Mg turnings (3.2 g, 0.132 mol). The mixture was stirred for 2 h at reflux. The Grignard solution was decanted from excess Mg under a stream of argon. After removing the  $Et_2O$  *in vacuo* the oily residue was diluted in dry THF and

cooled to  $-5\text{ }^{\circ}\text{C}$ . Afterwards, compound **10** (21.5 g, 77 mmol), dissolved in dry THF (10 mL), was added in one portion followed by a freshly prepared  $\text{Li}_2\text{CuCl}_4$  solution (10 mL, 0.1 m). The mixture was stirred for 2–3 h at  $-5$  to  $0\text{ }^{\circ}\text{C}$ . Then, the mixture was poured into an ice-cold saturated solution of  $\text{NH}_4\text{Cl}$ . The organic layer was separated and the aqueous phase was extracted with  $\text{Et}_2\text{O}$ . The combined ethereal phases were washed with water and brine, dried with  $\text{Na}_2\text{SO}_4$  and evaporated. The oily residues were purified by column chromatography yielding **11** (14.3 g, 69%) as colourless oil.  $\text{C}_{17}\text{H}_{32}\text{O}_2$  requires C, 76.06; H, 12.02; found: C, 76.06; H, 12.17%;  $^1\text{H}$  NMR (400 MHz;  $\text{CDCl}_3$ )  $\delta$  0.85 (d,  $J = 6.4$  Hz, 3 H,  $\text{CH}_3$ ), 1.07–1.40 (m, 11 H,  $\text{CH}_2\text{CH}(\text{CH}_2)_4$ ), 1.47–1.62 (m, 6 H,  $2\times\text{CH}_2\text{CH}_2\text{O}$ ,  $\text{CH}_2\text{CH}_2\text{CHO}$ ), 1.67–1.73 (m, 1 H,  $\text{CH}_2\text{CHO}$ ), 1.79–1.83 (m, 1 H,  $\text{CH}_2\text{CHO}$ ), 1.99–2.04 (m, 2 H,  $\text{CH}_2\text{CH}=\text{CH}_2$ ), 3.32–3.38 (m, 1 H,  $\text{CHOCH}_2$ ), 3.45–3.51 (m, 1 H,  $\text{CHOCH}_2$ ), 3.66–3.73 (m, 1 H,  $\text{CHOCH}_2$ ), 3.83–3.88 (m, 1 H,  $\text{CHOCH}_2$ ), 4.55–4.56 (m, 1 H,  $\text{OCHO}$ ), 4.89–5.00 (m, 2 H,  $\text{CH}=\text{CH}_2$ ), 5.74–5.84 (m, 1 H,  $\text{CH}=\text{CH}_2$ ); EI-MS  $m/z$  367 (1%,  $\text{M} - \text{H}$ ).

**(8*RS*)-11-Bromo-8-methylundec-1-ene (12).** Triphenylphosphane (21.5 g, 82 mmol) was dissolved in dry  $\text{CH}_2\text{Cl}_2$  (200 mL) and  $\text{Br}_2$  (13.1 g, 82 mmol) diluted in  $\text{CH}_2\text{Cl}_2$  (50 mL), was added dropwise into the solution whilst stirring at  $0\text{ }^{\circ}\text{C}$ . Compound **11** (13.68 g, 51 mmol) was added and the mixture was stirred overnight at r.t. The organic layer was washed with water and the crude bromide **12** was purified by column chromatography with heptane as eluent yielding **12** (10.46 g, 83%) as colourless oil.  $\text{C}_{12}\text{H}_{23}\text{Br}$  requires C, 58.30; H, 9.38; found: C, 58.36; H, 9.55%;  $^1\text{H}$  NMR (400 MHz;  $\text{CDCl}_3$ )  $\delta$  0.85 (d,  $J = 6.4$  Hz, 3 H,  $\text{CH}_3$ ), 1.07–1.45 (m, 11 H,  $\text{CH}_2\text{CH}(\text{CH}_2)_4$ ), 1.75–1.92 (m, 2 H,  $\text{BrCH}_2\text{CH}_2$ ), 2.00–2.05 (m, 2 H,  $\text{CH}_2\text{CH}=\text{CH}_2$ ), 3.37 (t,  $J = 7.0$  Hz, 2 H,  $\text{BrCH}_2$ ), 4.90–5.00 (m, 2 H,  $\text{CH}=\text{CH}_2$ ), 5.74–5.84 (m, 1 H,  $\text{CH}=\text{CH}_2$ ); EI-MS  $m/z$  246/248 (1%,  $\text{M}$ ).

## General procedure for the synthesis of 2-[(10-Methylalk-1-yl)oxy]tetrahydro-2*H*-pyrans **13a** and **13b**

### Method A.

Mg (2.19 g, 90 mmol) was poured into an argon-secured flask. Then compounds **6a,b** (75 mmol) dissolved in dry  $\text{Et}_2\text{O}$  (50 mL) were added dropwise whilst stirring. The mixture was heated for 3 h under reflux. Afterwards, the  $\text{Et}_2\text{O}$  was removed under reduced pressure and dry THF (80 mL) was added at  $0\text{ }^{\circ}\text{C}$ . A solution of 2-[(8-bromooctyl)oxy]tetrahydro-2*H*-pyran (**7a**; 17.6 g, 60 mmol) in dry THF (10 mL) was added in one portion whereas the temperature should be below  $0\text{ }^{\circ}\text{C}$ . At a temperature of  $-3$  to  $0\text{ }^{\circ}\text{C}$ , a  $\text{Li}_2\text{CuCl}_4$  solution in THF (0.1m, 5 mL) was added and the mixture was stirred at that temperature for 3 h. For work up, saturated  $\text{NH}_4\text{Cl}$  solution (100 mL) and  $\text{Et}_2\text{O}$  (100 mL) were added and the organic layer was separated. The water phase was extracted with  $\text{Et}_2\text{O}$  (50 mL) and the collected organic layers were dried over  $\text{Na}_2\text{SO}_4$  followed by evaporation of the solvent. The purification of the compounds **13** were realised using column chromatography with heptane/ $\text{Et}_2\text{O}$  and gradient technique.

### Method B.

The Grignard reagent was prepared from Mg (1.46 g, 60 mmol) and 2-[(6-bromohexyl)oxy]tetrahydro-2*H*-pyran (**7b**; 13.25 g, 50 mmol) in dry THF (100 mL) according to the procedure described above. The resulting Grignard solution was coupled with compound **12** (34 mmol) under catalytic conditions with  $\text{Li}_2\text{CuCl}_4$  (0.1m, 3.5 mL) at  $0\text{ }^{\circ}\text{C}$ . After work-up as described above, the crude product was purified by column chromatography with heptane/ $\text{Et}_2\text{O}$  and gradient technique.



**2-[[*(10R)*-10-Methylhexadecyl]oxy]tetrahydro-2H-pyran (13a).** Following the general procedure method A, **6a** (15.54 g) gave **13a** (16.3 g, 80%), colourless oil. C<sub>22</sub>H<sub>44</sub>O<sub>2</sub> requires C, 71.64; H, 12.21; found: C, 72.64; H, 12.94%; <sup>1</sup>H NMR (400 MHz, CDCl<sub>3</sub>) δ 0.81 (d, *J* = 6.5 Hz, 3 H, CHCH<sub>3</sub>), 0.88 (t, *J* = 6.9 Hz, 3 H, CH<sub>2</sub>CH<sub>3</sub>), 1.18–1.29 (m, 25 H, CH<sub>2</sub>, CHCH<sub>3</sub>), 1.45–1.88 (m, 8 H, 2× CH<sub>2</sub>CH<sub>2</sub>O, CH<sub>2</sub>CH<sub>2</sub>CHO), 3.32–3.40 (m, 1 H, CHOCH<sub>2</sub>), 3.45–3.51 (m, 1 H, CHOCH<sub>2</sub>), 3.68–3.75 (m, 1 H, CHOCH<sub>2</sub>), 3.83–3.89 (m, 1 H, CHOCH<sub>2</sub>), 4.55–4.57 (m, 1 H, OCHO); ESI-MS *m/z* 363.3 (M + Na).

**2-[[*(10R)*-10-Methylheptadec-16-en-1-yl]oxy]tetrahydro-2H-pyran (13b).** Following the general procedure method A, **6b** (16.44 g) gave **13b** (16.5 g, 78%). Following the general procedure method B, **12** (8.35 g) gave **13b** (8.75 g, 73%), colourless oil. C<sub>23</sub>H<sub>44</sub>O<sub>2</sub> requires C, 78.35; H, 12.58; found: C, 78.07; H, 12.92%; <sup>1</sup>H NMR (400 MHz; CDCl<sub>3</sub>) δ 0.82 (d, *J* = 6.6 Hz, 3 H, CH<sub>3</sub>), 1.05–1.38 (m, 23 H, CH<sub>2</sub>, CHCH<sub>3</sub>), 1.47–1.61 (m, 6 H, 2× CH<sub>2</sub>CH<sub>2</sub>O, CH<sub>2</sub>CH<sub>2</sub>CHO), 1.67–1.73 (m, 1 H, CH<sub>2</sub>CHO), 1.78–1.83 (m, 1 H, CH<sub>2</sub>CHO), 2.00–2.05 (m, 2 H, CH<sub>2</sub>CH=CH<sub>2</sub>), 3.34–3.39 (m, 1 H, CHOCH<sub>2</sub>), 3.45–3.50 (m, 1 H, CHOCH<sub>2</sub>), 3.68–3.74 (m, 1 H, CHOCH<sub>2</sub>), 3.83–3.88 (m, 1 H, CHOCH<sub>2</sub>), 4.55–4.57 (m, 1 H, OCHO), 4.89–5.00 (m, 2 H, CH=CH<sub>2</sub>), 5.74–5.85 (m, 1 H, CH=CH<sub>2</sub>); EI-MS *m/z* 351 (0.7%, M – H).

#### Methyl-branched bromoalkanes **14a** and **14b**.

The bromides **14a,b** were prepared from triphenylphosphorane diyl dibromide and compounds **13a,b** according to the method described above for compound **12**.

**(10R)-1-Bromo-10-methylhexadecane (14a).** Following the general procedure, triphenylphosphane (13.0 g, 51 mmol), Br<sub>2</sub> (8.15 g, 51 mmol), and **13a** (7.83 g, 23 mmol) gave **14a** (7.12 g, 97%), colourless oil. C<sub>17</sub>H<sub>35</sub>Br requires C, 63.93; H, 11.05; found: C, 64.13; H, 11.18%; <sup>1</sup>H NMR (400 MHz; CDCl<sub>3</sub>) δ 0.81–0.88 (m, 6 H, 2× CH<sub>3</sub>), 1.03–1.42 (m, 25 H, (CH<sub>2</sub>)<sub>7</sub>CH(CH<sub>2</sub>)<sub>5</sub>), 1.84 (quint, *J* = 7.0 Hz, 2 H, BrCH<sub>2</sub>CH<sub>2</sub>), 3.37–3.41 (m, 2 H, BrCH<sub>2</sub>); EI-MS *m/z* 318/320 (1%, M).

**(8R)-17-Bromo-8-methylheptadec-1-ene (14b).** Following the general procedure, triphenylphosphane (13.0 g, 51 mmol), Br<sub>2</sub> (8.15 g, 51 mmol), and **13b** (8.11 g, 23 mmol) gave **14b** (7.09 g, 93%), colourless oil. C<sub>18</sub>H<sub>35</sub>Br requires C, 65.24; H 10.65; found: C, 64.91; H, 10.76%. <sup>1</sup>H NMR (400 MHz; CDCl<sub>3</sub>) δ 0.82 (d, *J* = 6.6 Hz, 3 H, CH<sub>3</sub>), 1.03–1.43 (m, 23 H, (CH<sub>2</sub>)<sub>7</sub>CH(CH<sub>2</sub>)<sub>4</sub>), 1.84 (quint, *J* = 7.0 Hz, 2 H, BrCH<sub>2</sub>CH<sub>2</sub>), 2.00–2.05 (m, 2 H, CH<sub>2</sub>CH=CH<sub>2</sub>), 3.39 (t, *J* = 7.0 Hz, 2 H, BrCH<sub>2</sub>), 4.90–5.00 (m, 2 H, CH=CH<sub>2</sub>), 5.75–5.85 (m, 1 H, CH=CH<sub>2</sub>); EI-MS *m/z* 330/332 (2.4%, M).

## Synthesis of diglycerol tetraethers – reaction pathway I

### General procedure of *O*-alkylation of 1,2-*O*-isopropylidene-*sn*-glycerols 16.

Suspension of KH (22.5 mmol, 30%) was freed from paraffin oil by washing with dry toluene under argon. The residue of KH was suspended in dry toluene (8 mL). A solution of 1,2-*O*-isopropylidene-*sn*-glycerol (**15**; 2.61 g, 22.5 mmol) in dry toluene (20 mL) was dropped into the slurry whilst stirring. The mixture was stirred for a further 18 h at r.t. until the K-salt formation was completed. Afterwards, compounds **14** (17 mmol), dissolved in dry toluene (10 mL), were added and the mixture was heated for 10 h under reflux. After cooling to r.t., water (30 mL) was added and the mixture was stirred for 30 min. The organic layer was separated and the water phase was extracted two times with CHCl<sub>3</sub> (20 mL). The combined organic layers were dried over Na<sub>2</sub>SO<sub>4</sub>, evaporated and purified using column chromatography and heptane/Et<sub>2</sub>O as eluent and gradient technique.

**1,2-*O*-isopropylidene-3-*O*-(heptadec-16-en-1-yl)-*sn*-glycerol (16a).** Following the general procedure, **14a** (5.4 g) gave **16a** (4.51 g, 73%), colourless oil.  $[\alpha]_D^{22} +12.82$  (*c* 0.86 g/mL, pure); C<sub>23</sub>H<sub>44</sub>O<sub>3</sub> requires C, 74.95; H, 12.03; found: C, 75.07; H, 12.24%; <sup>1</sup>H NMR (400 MHz; CDCl<sub>3</sub>)  $\delta$  1.23–1.32 (m, 24 H, (CH<sub>2</sub>)<sub>12</sub>), 1.34 (s, 3 H, CH<sub>3</sub>), 1.40 (s, 3 H, CH<sub>3</sub>), 1.55 (quint, *J* = 7.0 Hz, 2 H, CH<sub>2</sub>CH<sub>2</sub>O), 1.99–2.04 (m, 2 H, CH<sub>2</sub>CH=CH<sub>2</sub>), 3.37–3.51 (m, 4 H, 2× CH<sub>2</sub>O), 3.68–3.72 (m, 1 H, CHHOC(CH<sub>3</sub>)<sub>2</sub>O), 4.01–4.05 (m, 1 H, CHHOC(CH<sub>3</sub>)<sub>2</sub>O), 4.23 (quint, *J* = 6.0 Hz, 1 H, CHO), 4.88–4.99 (m, 2 H, CH=CH<sub>2</sub>), 5.74–5.84 (m, 1 H, CH=CH<sub>2</sub>); <sup>13</sup>C NMR (100 MHz; CDCl<sub>3</sub>)  $\delta$  25.89, 26.22, 26.94, 29.10, 29.30, 29.60–29.80, 33.94, 67.07, 71.91, 71.96, 74.85, 109.32, 114.0, 139.18; EI-MS *m/z* 368 (8.6%, M).

**1,2-*O*-isopropylidene-3-*O*-[(10*RS*)-10-methylheptadec-16-en-1-yl]-*sn*-glycerol (16b).** Following the general procedure, **14b** (5.6 g) gave **16b** (4.42 g, 68%), colourless oil. C<sub>24</sub>H<sub>46</sub>O<sub>3</sub> requires C, 75.34; H, 12.12; found: C, 75.27; H 12.24%; <sup>1</sup>H NMR (400 MHz; CDCl<sub>3</sub>)  $\delta$  0.82 (d, *J* = 6.6 Hz, 3 H, CHCH<sub>3</sub>), 1.05–1.36 (m, 23 H, (CH<sub>2</sub>)<sub>7</sub>CH(CH<sub>2</sub>)<sub>4</sub>), 1.34 (s, 3 H, CCH<sub>3</sub>), 1.40 (s, 3 H, CCH<sub>3</sub>), 1.50–1.59 (m, 2 H, CH<sub>2</sub>CH<sub>2</sub>O), 1.99–2.05 (m, 2 H, CH<sub>2</sub>CH=CH<sub>2</sub>), 3.38–3.52 (m, 4 H, 2× CH<sub>2</sub>O), 3.69–3.73 (m, 1 H, CHHOC(CH<sub>3</sub>)<sub>2</sub>O), 4.02–4.05 (m, 1 H, CHHOC(CH<sub>3</sub>)<sub>2</sub>O), 4.21–4.27 (m, 1 H, CHO), 4.89–5.00 (m, 2 H, CH=CH<sub>2</sub>), 5.74–5.85 (m, 1 H, CH=CH<sub>2</sub>); <sup>13</sup>C NMR (100 MHz; CDCl<sub>3</sub>)  $\delta$  19.76, 25.49, 26.12, 26.83, 26.96, 27.12, 29.04, 29.52–29.69, 30.05, 32.79, 33.86, 37.07, 37.12, 67.01, 71.86, 71.91, 74.81, 109.32, 114.06, 139.19; EI-MS *m/z* 382 (4.3%, M).

### General procedure of the synthesis of 3-*O*-alkyl-*sn*-glycerols 17.

Compounds **16a** or **16b** (12 mmol) and PPTS (50 mg) were suspended in dry MeOH (40 mL) and heated for 10 h at reflux. Then, the solvent was removed, the residue was dissolved in CHCl<sub>3</sub> (70 mL) and washed with water (70 mL). The water layer was extracted two times with a CHCl<sub>3</sub>/MeOH mixture (70 mL; 9/1, v/v) and the combined organic layers were dried over Na<sub>2</sub>SO<sub>4</sub> and evaporated. The crude products were purified by column chromatography using CHCl<sub>3</sub>/Et<sub>2</sub>O as eluent and gradient technique.

**3-*O*-(Heptadec-16-en-1-yl)-*sn*-glycerol (17a).** Following the general procedure, **16a** (4.42 g) gave **17a** (3.35 g, 85%), white solid substance. M.p. 56 °C;  $[\alpha]_{22}^D -0.6$  (*c* 0.1 g/mL, CHCl<sub>3</sub>); C<sub>20</sub>H<sub>40</sub>O<sub>3</sub>

requires C, 73.12; H, 12.27; found: C, 73.28; H, 11.94%;  $^1\text{H}$  NMR (400 MHz;  $\text{CDCl}_3$ )  $\delta$  1.19–1.37 (m, 24 H,  $(\text{CH}_2)_{12}$ ), 1.52–1.59 (m, 2 H,  $\text{CH}_2\text{CH}_2\text{O}$ ), 1.99–2.04 (m, 2 H,  $\text{CH}_2\text{CH}=\text{CH}_2$ ), 2.29 (bs, 2 H,  $2\times \text{OH}$ ), 3.42–3.53 (m, 4 H,  $2\times \text{CH}_2\text{O}$ ), 3.61–3.72 (m, 2 H,  $\text{CH}_2\text{OH}$ ), 3.81–3.86 (m, 1 H,  $\text{CHOH}$ ), 4.89–5.00 (m, 2 H,  $\text{CH}=\text{CH}_2$ ), 5.74–5.84 (m, 1 H,  $\text{CH}=\text{CH}_2$ );  $^{13}\text{C}$  NMR (100 MHz;  $\text{CDCl}_3$ )  $\delta$  26.14, 29.01, 29.21, 29.52–29.71, 33.85, 64.27, 70.59, 71.88, 72.46, 114.05, 139.20; EI-MS  $m/z$  328 (8.9%, M).

**3-*O*-[(10*RS*)-10-methylheptadec-16-en-1-yl]-*sn*-glycerol (17b).** Following the general procedure, **16b** (4.59 g) gave **17b** (3.74 g, 91%), colourless oil.  $\text{C}_{21}\text{H}_{42}\text{O}_3$  requires C, 73.63; H, 12.36; found: C, 73.27; H, 12.35%;  $^1\text{H}$  NMR (400 MHz;  $\text{CDCl}_3$ )  $\delta$  0.81 (d,  $J = 6.6$  Hz, 3 H,  $\text{CH}_3$ ), 1.04–1.37 (m, 23 H,  $(\text{CH}_2)_7\text{CH}(\text{CH}_2)_4$ ), 1.51–1.58 (m, 2 H,  $\text{CH}_2\text{CH}_2\text{O}$ ), 1.99–2.04 (m, 2 H,  $\text{CH}_2\text{CH}=\text{CH}_2$ ), 2.52 (bs, 2 H,  $2\times \text{OH}$ ), 3.39–3.54 (m, 4 H,  $2\times \text{CH}_2\text{O}$ ), 3.59–3.70 (m, 2 H,  $\text{CH}_2\text{OH}$ ), 3.81–3.85 (m, 1 H,  $\text{CHOH}$ ), 4.88–4.99 (m, 2 H,  $\text{CH}=\text{CH}_2$ ), 5.75–5.84 (m, 1 H,  $\text{CH}=\text{CH}_2$ );  $^{13}\text{C}$  NMR (100 MHz;  $\text{CDCl}_3$ )  $\delta$  19.76, 26.14, 26.96, 27.12, 29.04, 29.52–29.70, 30.05, 32.79, 33.86, 37.07, 37.13, 64.31, 70.52, 71.89, 72.51, 114.06, 139.21; ESI-MS  $m/z$  365.4 (M + Na).

4. Characterisation of products – MS, <sup>1</sup>H NMR, <sup>13</sup>C NMR spectra  
*Compound 4b*: <sup>1</sup>H-NMR

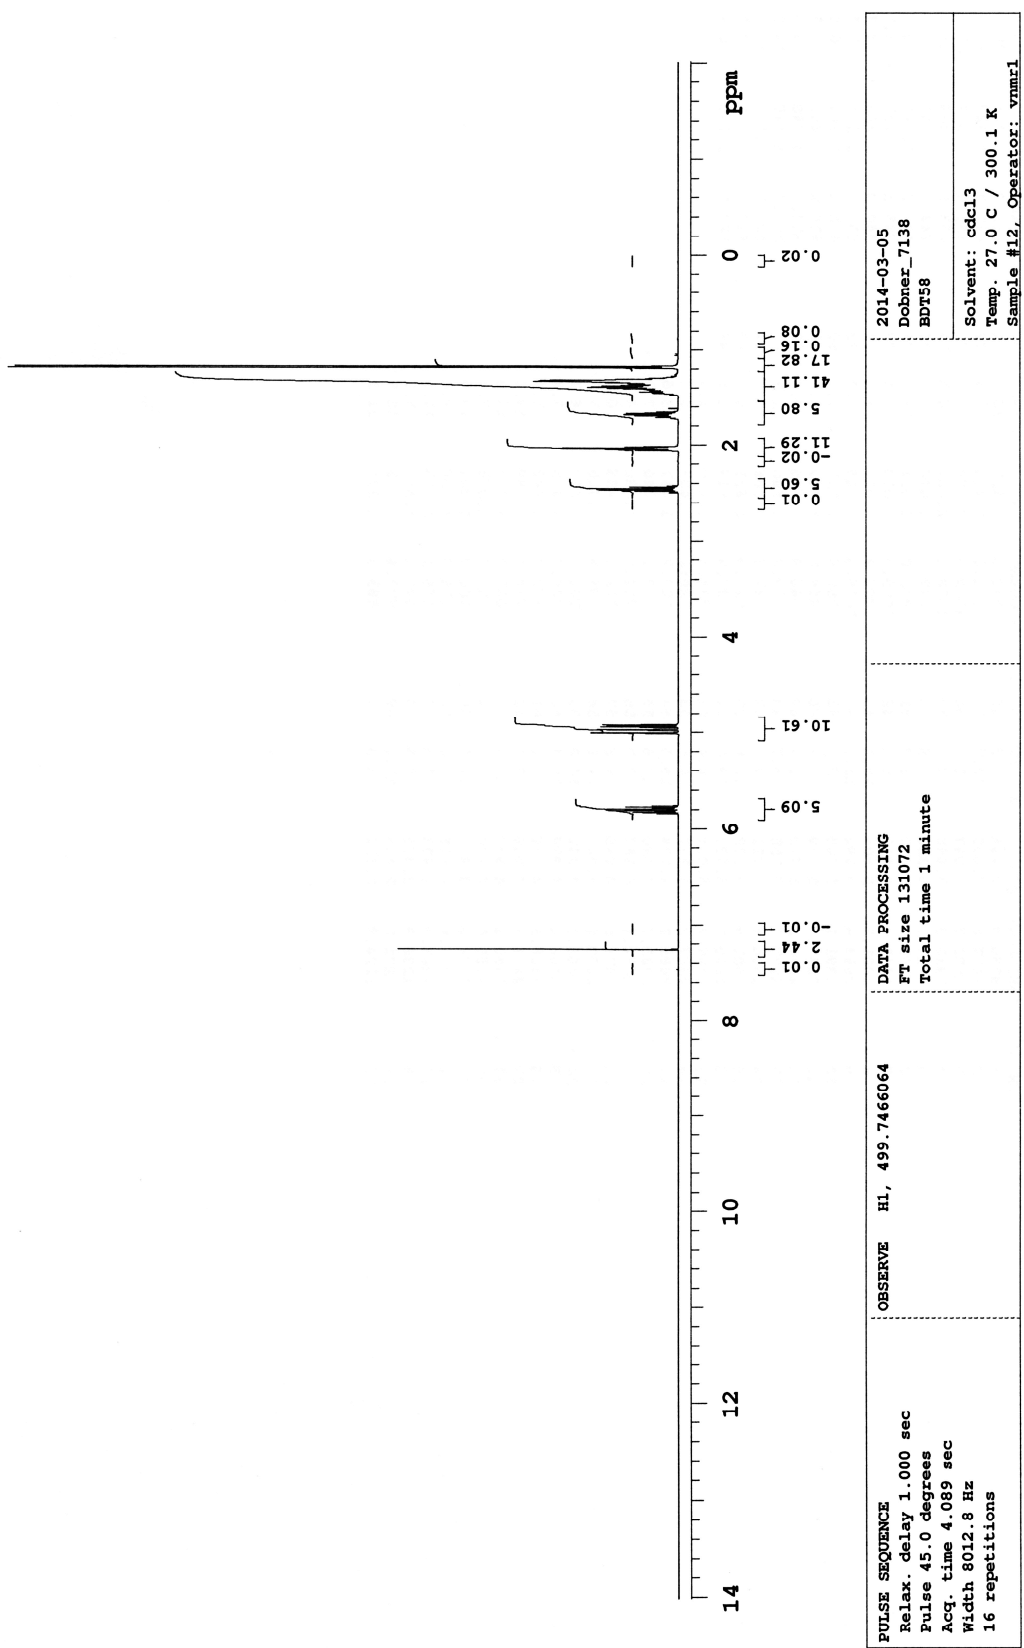

File: Dobner\_7138\_2014-03-05\_01/Dobner\_7138\_PROTON\_01

Compound **4b**:  $^{13}\text{C}$ -NMR

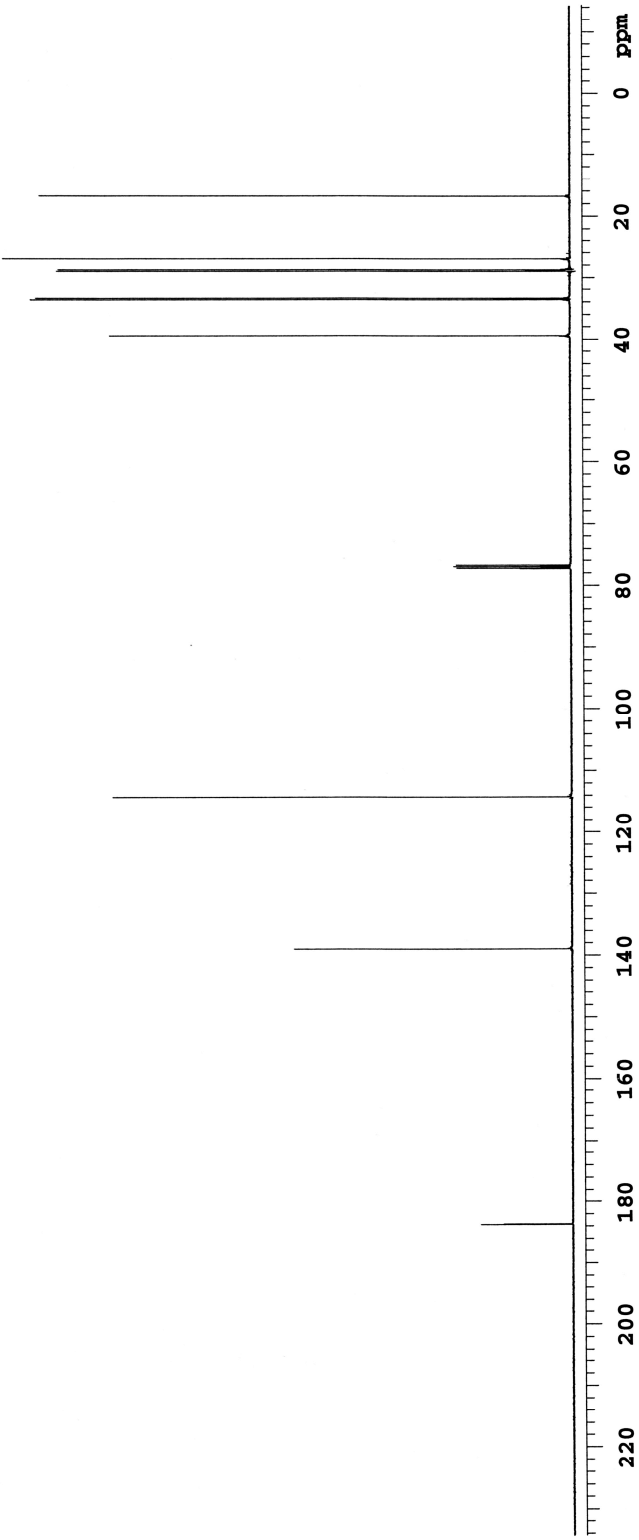

|                                                                                                                                      |                                                                                                                                   |                                                                                             |                                                                                                                  |
|--------------------------------------------------------------------------------------------------------------------------------------|-----------------------------------------------------------------------------------------------------------------------------------|---------------------------------------------------------------------------------------------|------------------------------------------------------------------------------------------------------------------|
| <b>PULSE SEQUENCE</b><br>Relax. delay 1.000 sec<br>Pulse 45.0 degrees<br>Acq. time 1.049 sec<br>Width 31250.0 Hz<br>1000 repetitions | <b>OBSERVE</b> C13, 125.6613841<br><b>DECOUPLE</b> H1, 499.7491051<br><b>Power</b> 40 dB<br>continuously on<br>WALTZ-16 modulated | <b>DATA PROCESSING</b><br>Line broadening 0.5 Hz<br>FT size 131072<br>Total time 34 minutes | 2014-03-05<br>Dobner_7139<br>BDT58<br><br>Solvent: cdcl3<br>Temp. 27.0 C / 300.1 K<br>Sample #1, Operator: vnmr1 |
|--------------------------------------------------------------------------------------------------------------------------------------|-----------------------------------------------------------------------------------------------------------------------------------|---------------------------------------------------------------------------------------------|------------------------------------------------------------------------------------------------------------------|

File: Dobner\_7139\_2014-03-05\_01/Dobner\_7139\_CARBON\_01

Compound 5b: <sup>1</sup>H-NMR

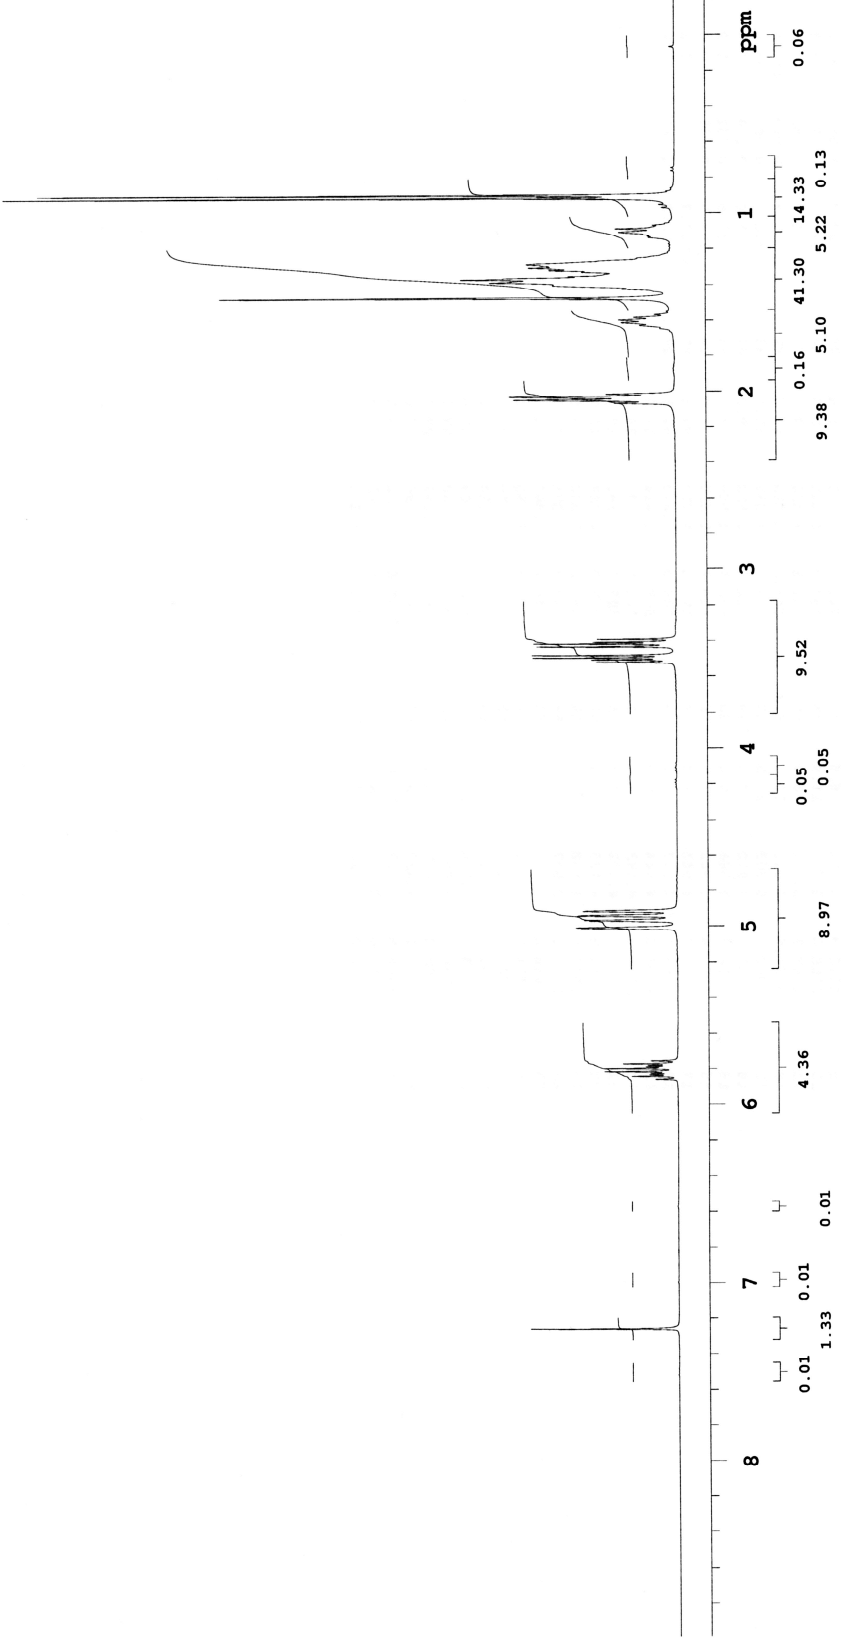

|                                                                                                                                                       |                                |                                                                                                        |                                                                                                                                       |
|-------------------------------------------------------------------------------------------------------------------------------------------------------|--------------------------------|--------------------------------------------------------------------------------------------------------|---------------------------------------------------------------------------------------------------------------------------------------|
| <p>PULSE SEQUENCE</p> <p>Relax. delay 1.000 sec</p> <p>Pulse 45.0 degrees</p> <p>Acq. time 5.112 sec</p> <p>Width 6410.3 Hz</p> <p>16 repetitions</p> | <p>OBSERVE H1, 399.9597531</p> | <p>DATA PROCESSING</p> <p>Line broadening 0.1 Hz</p> <p>FT size 131072</p> <p>Total time 1 minutes</p> | <p>Dobner_2059</p> <p>BD763/2</p> <p>Solvent: cdcl3</p> <p>Temp. 27.0 C / 300.1 K</p> <p>Operator: vnmr1</p> <p>VNMRS-400 "lampe"</p> |
|-------------------------------------------------------------------------------------------------------------------------------------------------------|--------------------------------|--------------------------------------------------------------------------------------------------------|---------------------------------------------------------------------------------------------------------------------------------------|

Compound 5b: <sup>13</sup>C-NMR

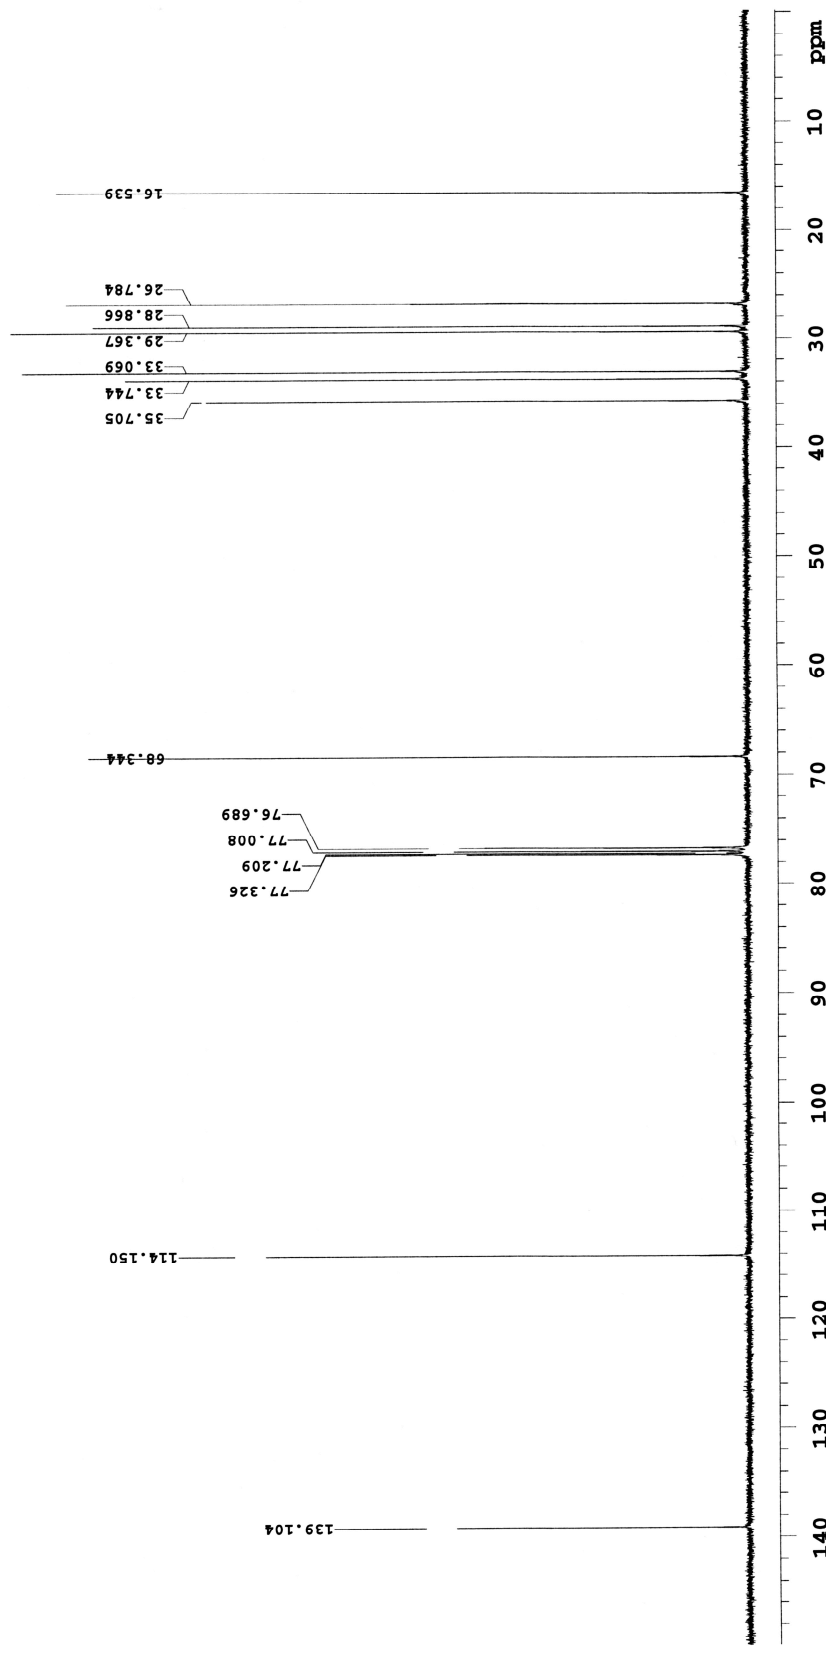

|                                                                                                                                                          |                                                                                                                                    |                                                                                                         |                                                                                                                                              |
|----------------------------------------------------------------------------------------------------------------------------------------------------------|------------------------------------------------------------------------------------------------------------------------------------|---------------------------------------------------------------------------------------------------------|----------------------------------------------------------------------------------------------------------------------------------------------|
| <p>PULSE SEQUENCE</p> <p>Relax. delay 1.000 sec</p> <p>Pulse 45.0 degrees</p> <p>Acq. time 1.311 sec</p> <p>Width 25000.0 Hz</p> <p>1000 repetitions</p> | <p>OBSERVE C13, 100.569599</p> <p>DECOUPLE H1, 399.9617529</p> <p>Power 39 dB</p> <p>continuously on</p> <p>WALTZ-16 modulated</p> | <p>DATA PROCESSING</p> <p>Line broadening 0.5 Hz</p> <p>FT size 131072</p> <p>Total time 38 minutes</p> | <p>Dobner_2060</p> <p>BDT62/2 = 63/2</p> <p>Solvent: cdcl3</p> <p>Temp. 27.0 C / 300.1 K</p> <p>Operator: vnmr1</p> <p>VNMRS-400 "lampe"</p> |
|----------------------------------------------------------------------------------------------------------------------------------------------------------|------------------------------------------------------------------------------------------------------------------------------------|---------------------------------------------------------------------------------------------------------|----------------------------------------------------------------------------------------------------------------------------------------------|

Compound **6b**:  $^1\text{H}$ -NMR

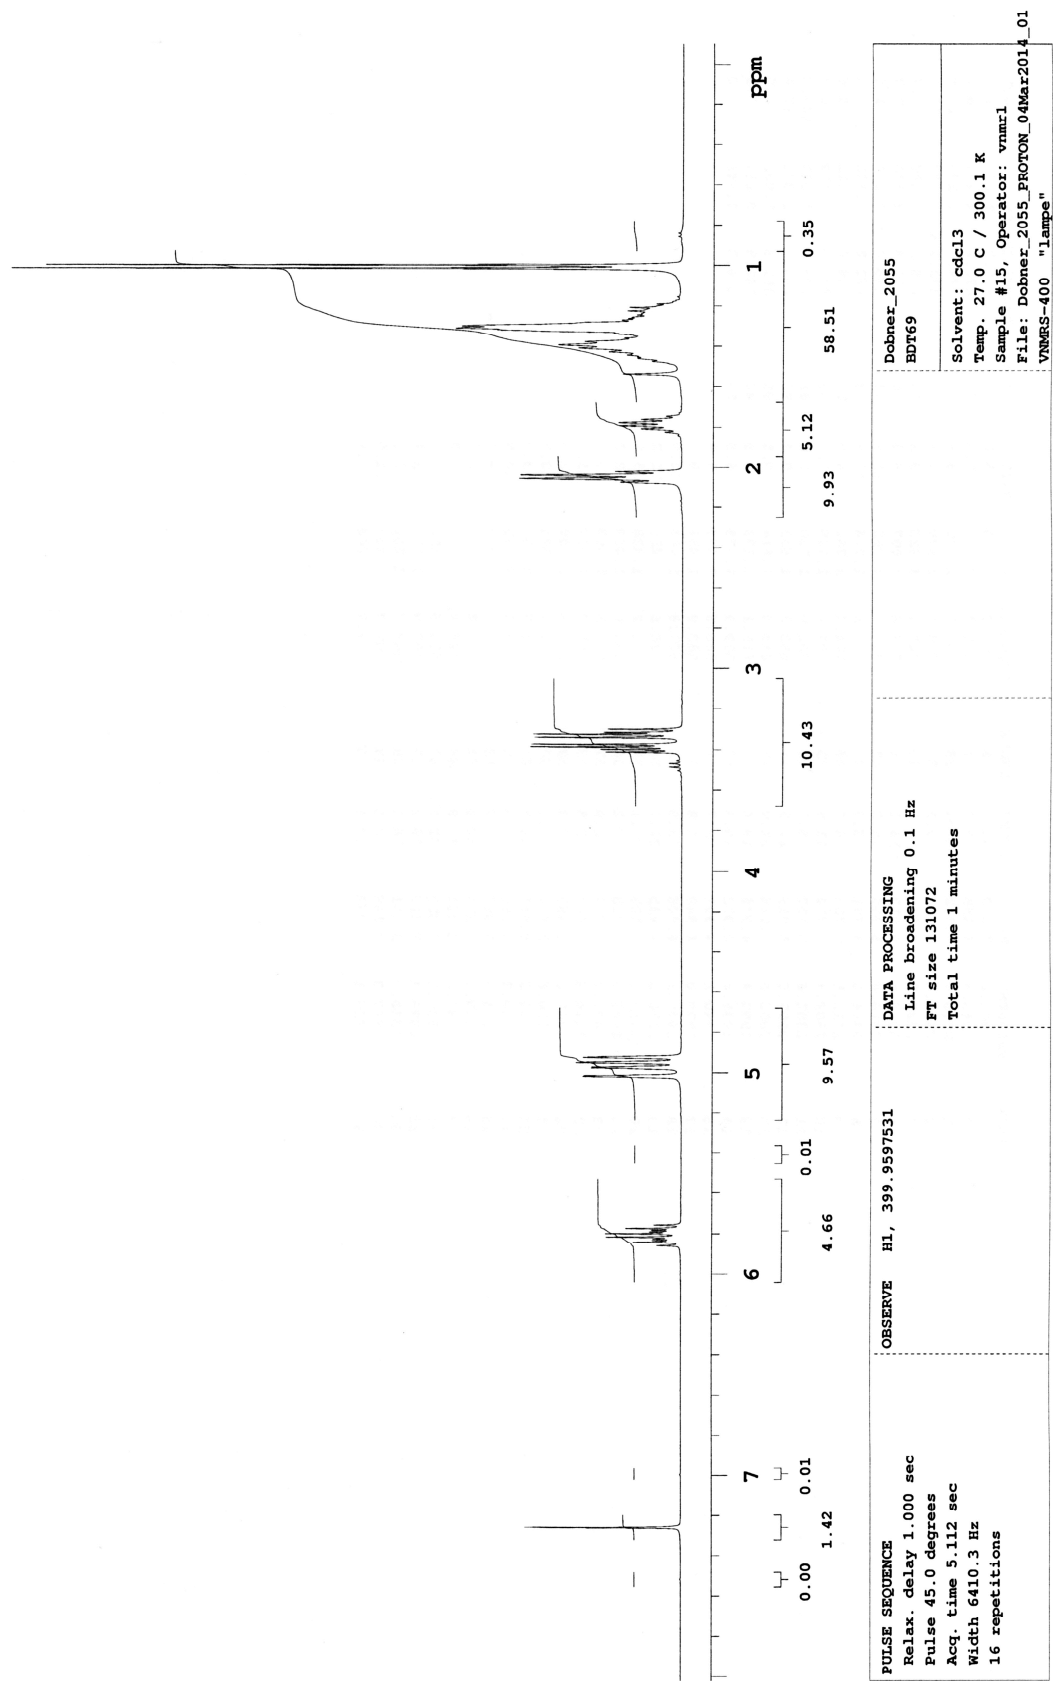



Compound **6b**:  $^{13}\text{C}$ -NMR

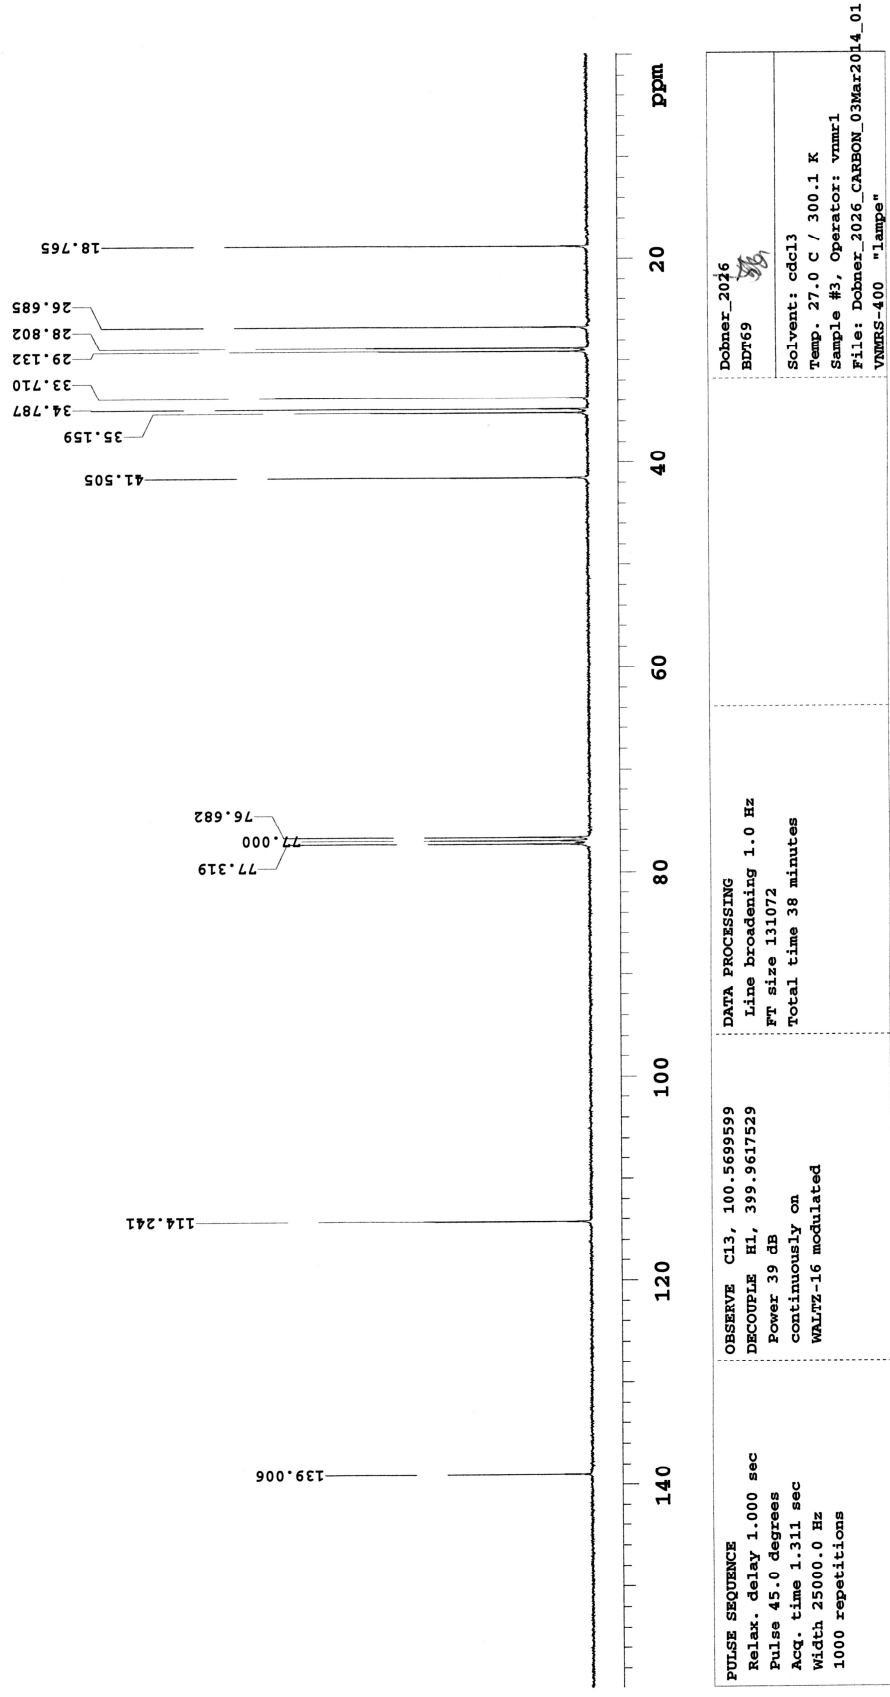

```

markowski_6279~80_ IM-GR-13
exp7 szpul SAMPLE SPECIAL
date sep 14 2009 temp 27.0 y
solvent cdc13 gain not used
file export/home/~ spin 0
vnmr1/auto/r3/14/~ hst 0.008
Markowski_6279~80_ pw90 12.200
Markowski_6279~80_ pw90 12.200
02 alfa 51.700
FLAGS
ACQUISITION
sw 6799.3 il n y
at 2.502 in y y
np 34022 ds n y
pr 3800 hp n y
ds 4 n y
bs 2.000 fn not used
ct 32 sp
ct TRANSMITTER H1 wf1
tp 399.960 rfp 800.0
sfreq 608.0 rfp -42.1
tof 608.0 rfp -12.6
tpwr 59 lp PLOT
pv 6.100 wc 250
DECOUPLER H1 SC 0
dn do 0
dn do 0
dn nn th 60
dm c ai 0
dm c ai
dwr 34
dwr 10096
dwr ph
dwr def

```

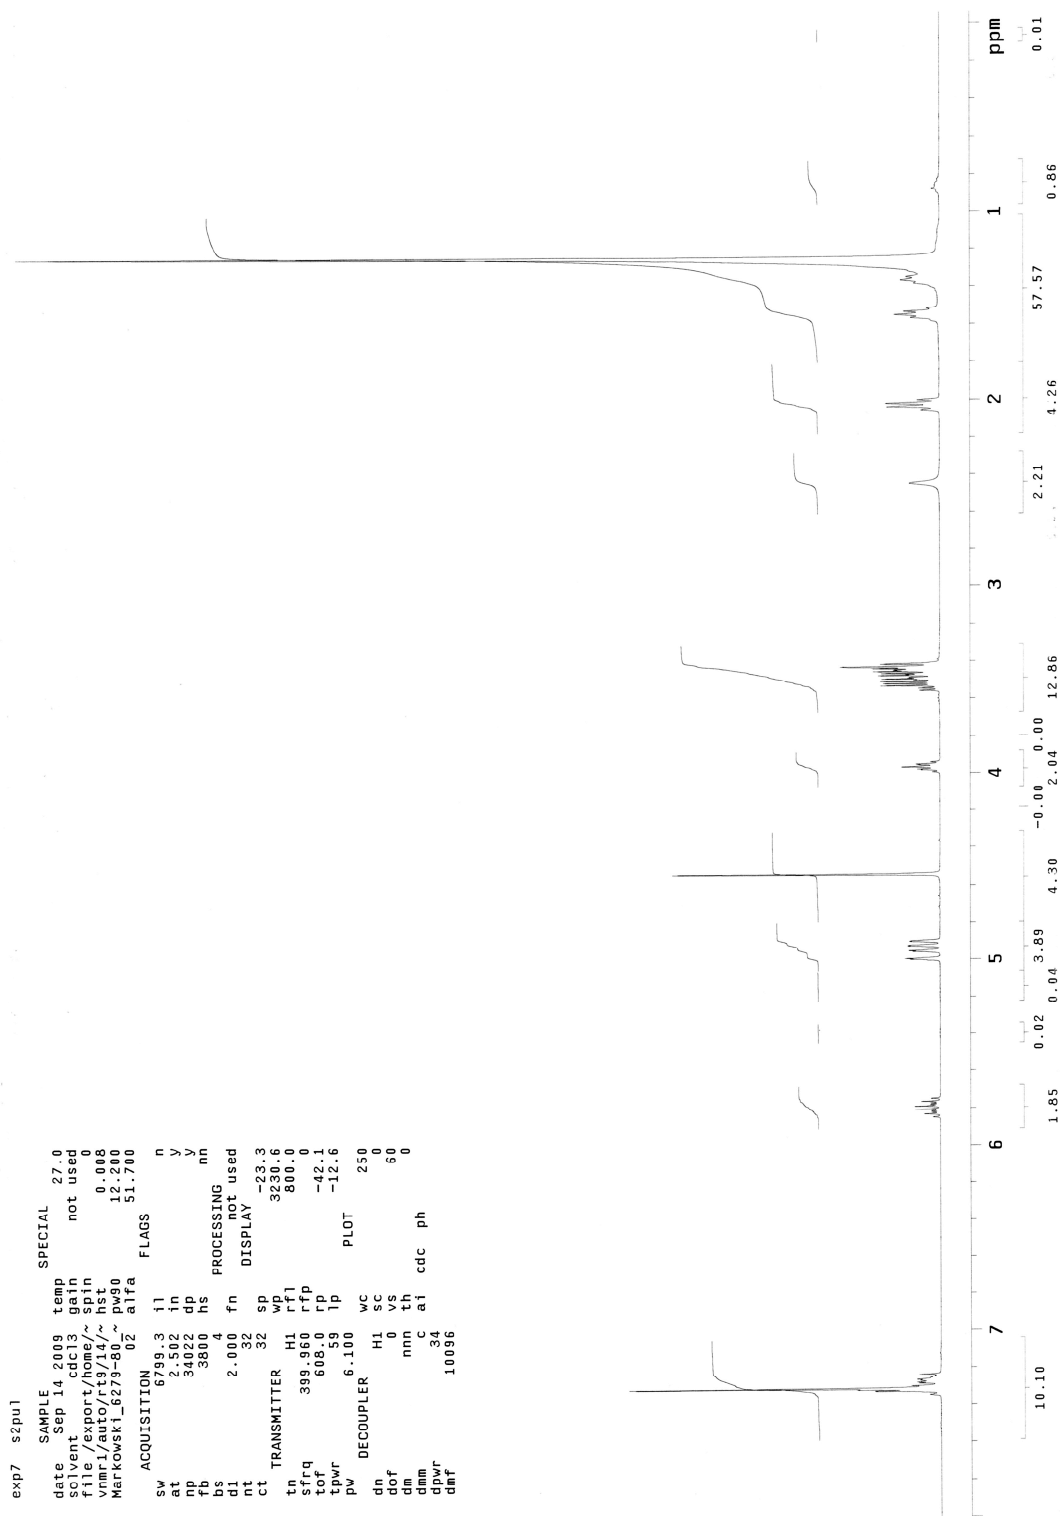

Compound 18a: <sup>13</sup>C-NMR

Markowski  
TM-GR-13  
Nr. 6283

expl std13c

SAMPLE DEC. & VT  
date Sep 15 2009 dfrq 399.959  
solvent CDCl3 dn H1  
file ACQUISITION exp 34  
sfrq 100.580 dm 0  
tn 1.013 dmm wvy  
at 1.013 dmm 1009W  
np 63272 dmm 1009W  
sq 24136.6 temp 27.0  
fo 13400 lb PROCESSING 1.00  
bs 4 wfile  
tpwr 55 proc ft  
pw 6.0 fn 131072  
d1 2.000  
tof 1555.1 werr  
nt 512 wexp  
ct 218 wps  
a1ock n  
gain not used  
flags n  
f1 n  
in n  
dp DISPLAY y  
sp 1.0  
wp 18122.3  
vs 99  
sc 0  
wc 250  
hzmm 72.43  
ss 50.00  
rf1 1017.0  
rfd 0  
th 5  
ins 100.000  
nm ph

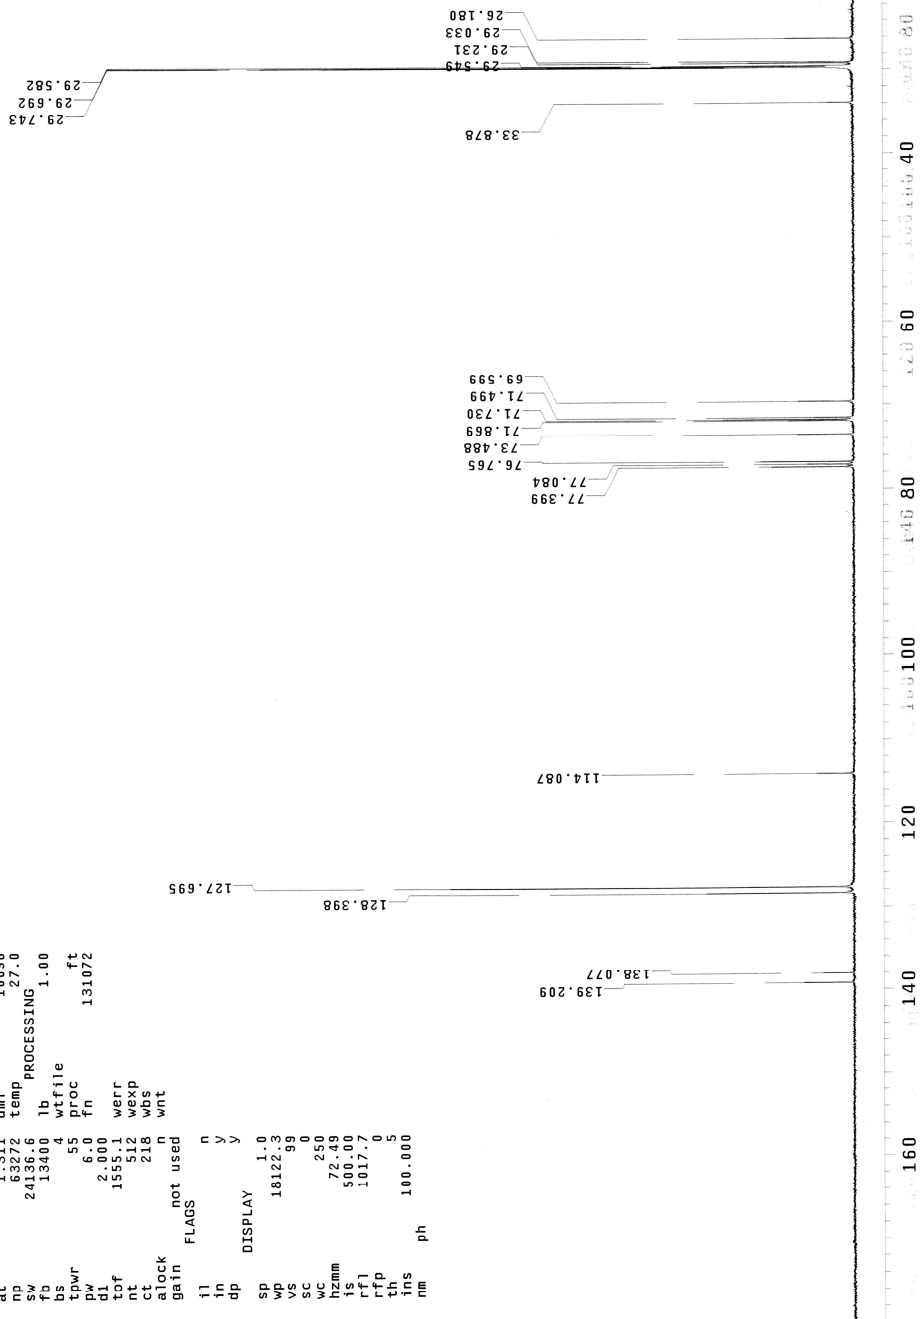

Compound 18b:  $^1\text{H}$ -NMR

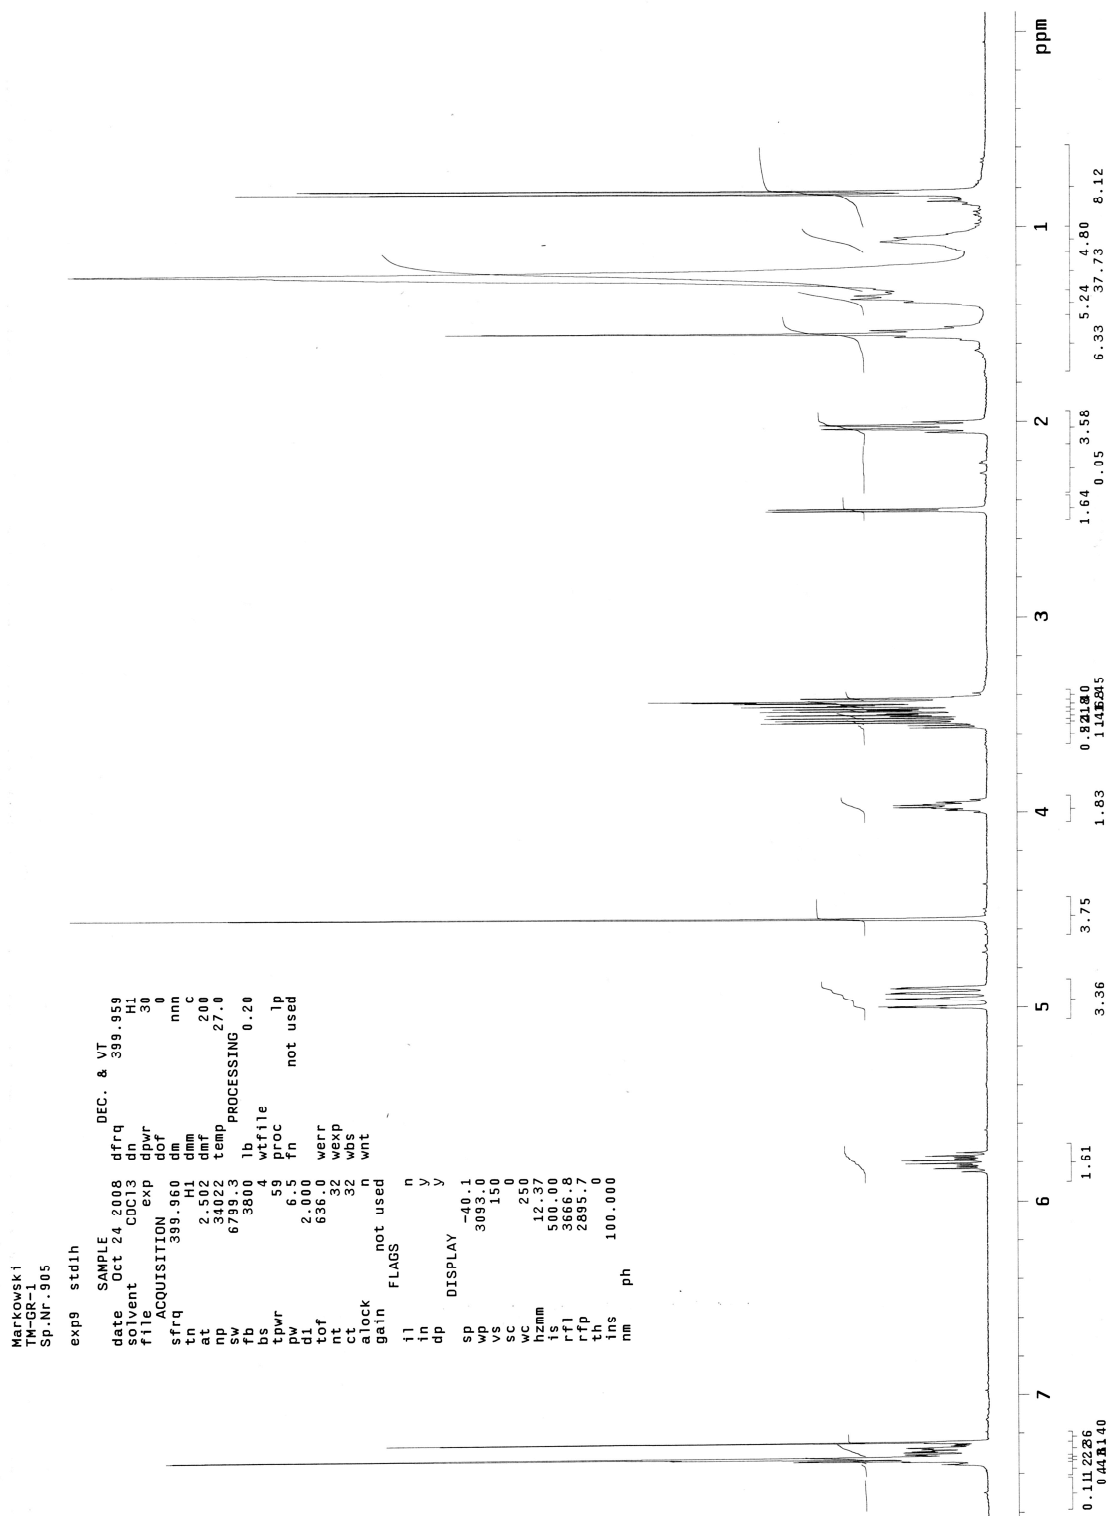

[illegible]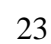

MARKOVSKI  
TM-CR-114  
SF-NR 6589

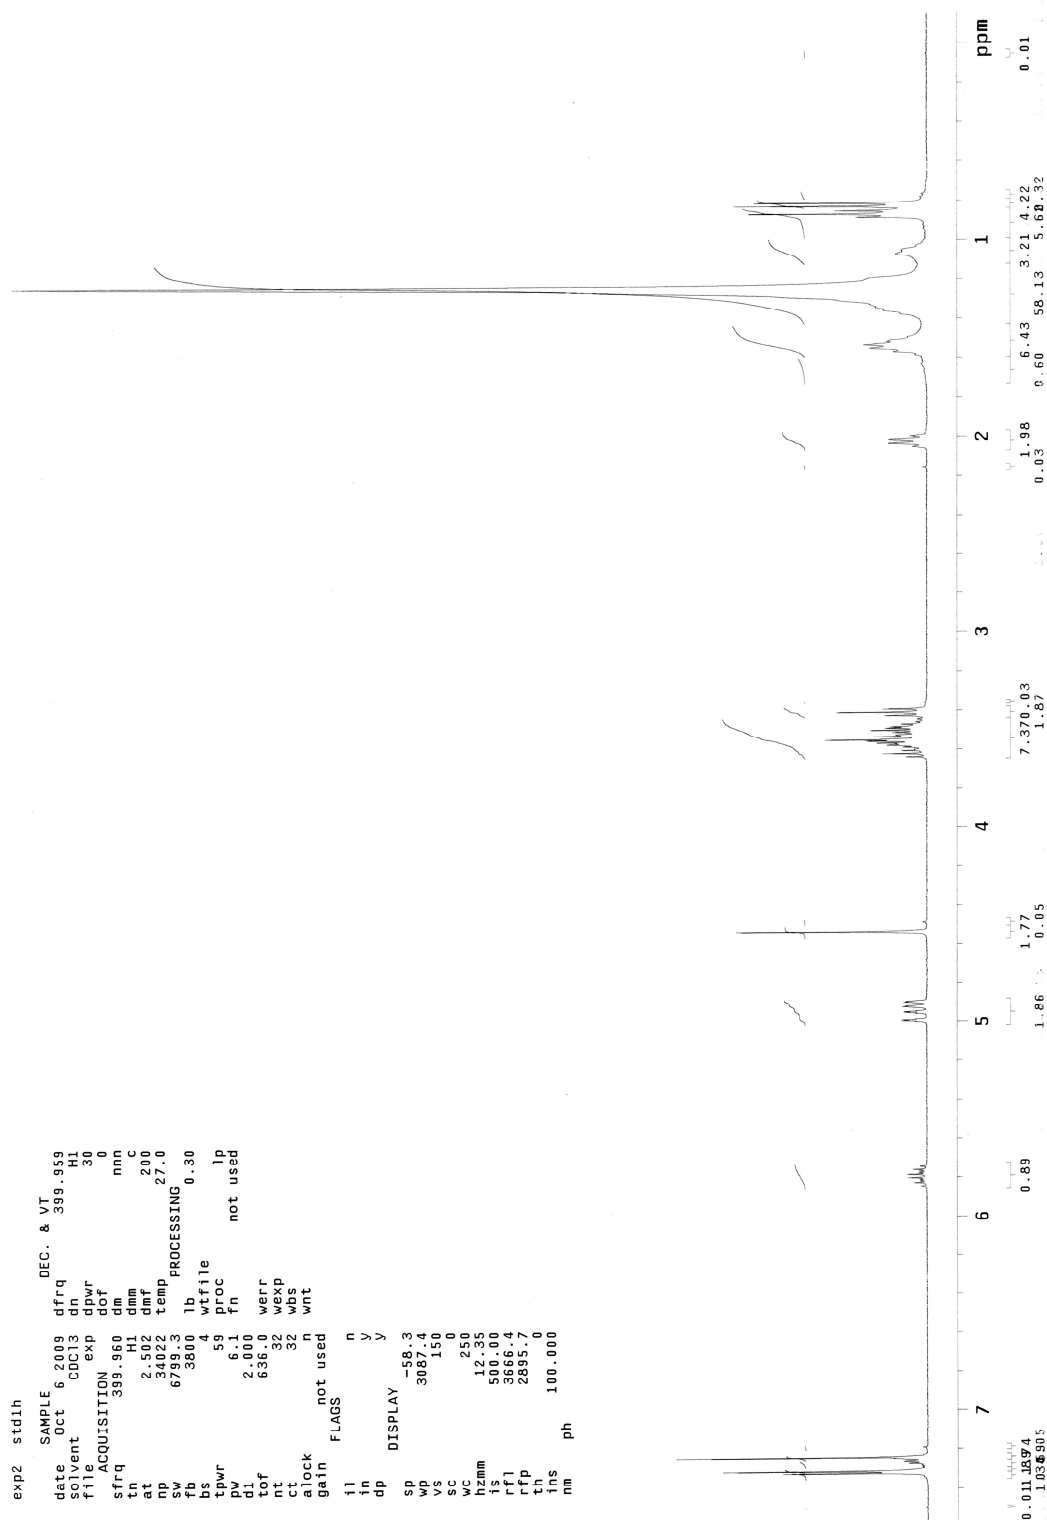

Compound 19a:  $^{13}\text{C}$ -NMR

Markowski\_6811\_TM-GR-14

```

exp1 s2pul1
SAMPLE
date Oct 19 2009 temp 27.0
solvent cdcl3 gain not used
file /export/home/~spin 20
nmr1/autort10/19~hst 0.008
a/Markowski_6811_0~pw90 9.400
ACQUISITION I alfa 20.000
SW 25142.3 il n
at 1.311 in v
pp 65908 dp v
fb 13800 hs
bs 16
di 2.000 lb 1.00
nt 2048 fn 131072
ct 2048 ct DISPLAY -79.8
TRANSMITTER C13 wp 16170.7
sfreq 100.590 rfl 1508.5
cof 156751 rfp 21.1
tpwr 4.700 lp -217.1
PLOT
pv DECOUPLER H1 wc 250
dn 0 SC 36
dof 0 SC 36
dm vvy vs
dmm w th
dpwr 34 ai
dnf 10096
ph

```

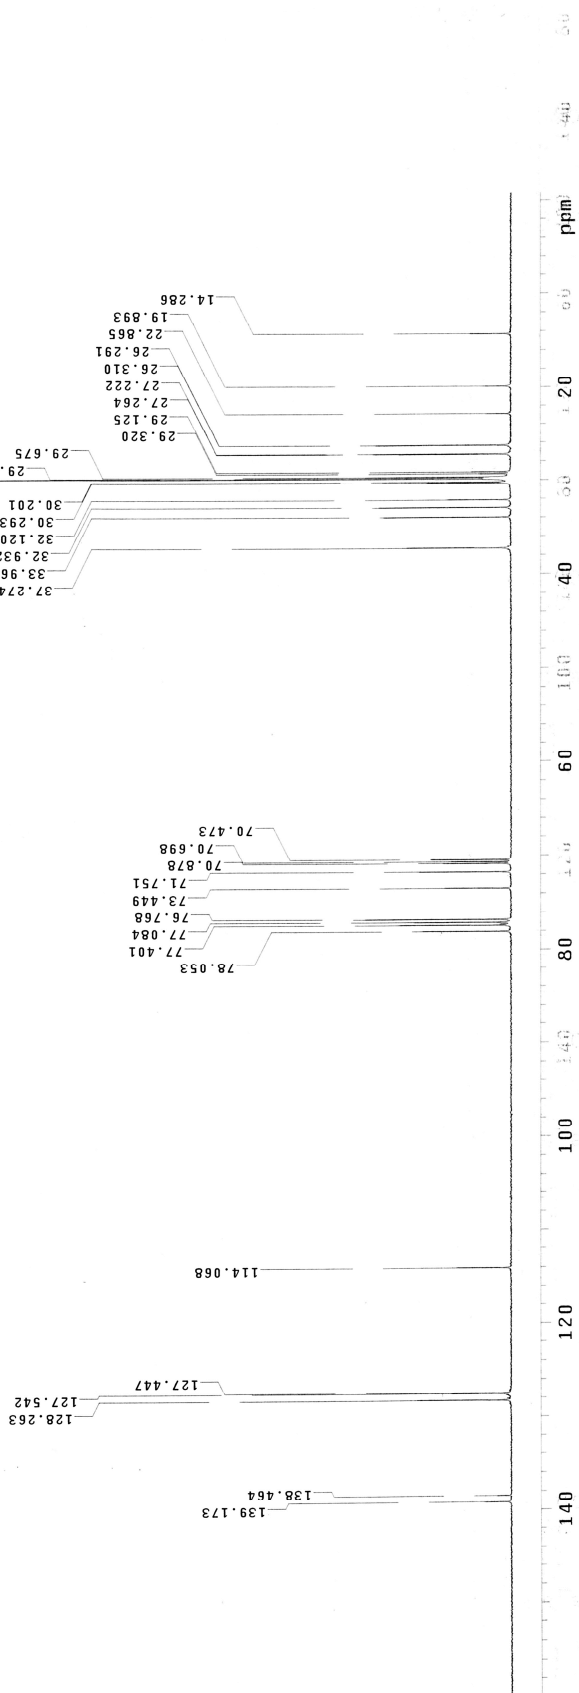

Markowski  
TM-GR-2  
Sp. Nr. 316

| Markowski |          | SAMPLE           |      | DEC. & VT  |   |
|-----------|----------|------------------|------|------------|---|
| TM-GR-2   |          | date Nov 17 2008 |      | H1 399.959 |   |
| Sp.Nr.316 |          | file             |      | CO13       |   |
| exp3 stdh |          | ACQUISITION      |      | exp        |   |
| sfrq      | 399.960  | dm               | 0    | nmn        | 0 |
| at        | 2.502    | dm               | 0    | nmn        | 0 |
| sw        | 3402     | temp             | 27.0 | nmn        | 0 |
| fb        | 6799.3   | PROCESSING       | 0.20 | nmn        | 0 |
| bw        | 3800     | lb               | 0    | nmn        | 0 |
| bs        | 4        | wfile            | 0    | nmn        | 0 |
| tpwr      | 59       | fn               | 0    | nmn        | 0 |
| pv        | 6.5      | fn               | 0    | nmn        | 0 |
| dd        | 2.000    | werr             | 0    | nmn        | 0 |
| tofof     | 636.0    | wexp             | 0    | nmn        | 0 |
| ct        | 32       | wss              | 0    | nmn        | 0 |
| clock     | n        | wnt              | 0    | nmn        | 0 |
| magain    | not used |                  |      | nmn        | 0 |
| flags     |          |                  |      | nmn        | 0 |
| il        | n        |                  |      | nmn        | 0 |
| in        | y        |                  |      | nmn        | 0 |
| dp        | y        |                  |      | nmn        | 0 |
| DISPLAY   |          |                  |      | nmn        | 0 |
| sp        | -45.3    |                  |      | nmn        | 0 |
| wp        | 3014.2   |                  |      | nmn        | 0 |
| vs        | 150      |                  |      | nmn        | 0 |
| sc        | 0        |                  |      | nmn        | 0 |
| h         | 250      |                  |      | nmn        | 0 |
| hmm       | 12.06    |                  |      | nmn        | 0 |
| is        | 500.00   |                  |      | nmn        | 0 |
| rfl       | 3666.4   |                  |      | nmn        | 0 |
| rpf       | 2895.7   |                  |      | nmn        | 0 |
| th        | 2        |                  |      | nmn        | 0 |
| ins       | 100.000  |                  |      | nmn        | 0 |
| ph        |          |                  |      | nmn        | 0 |

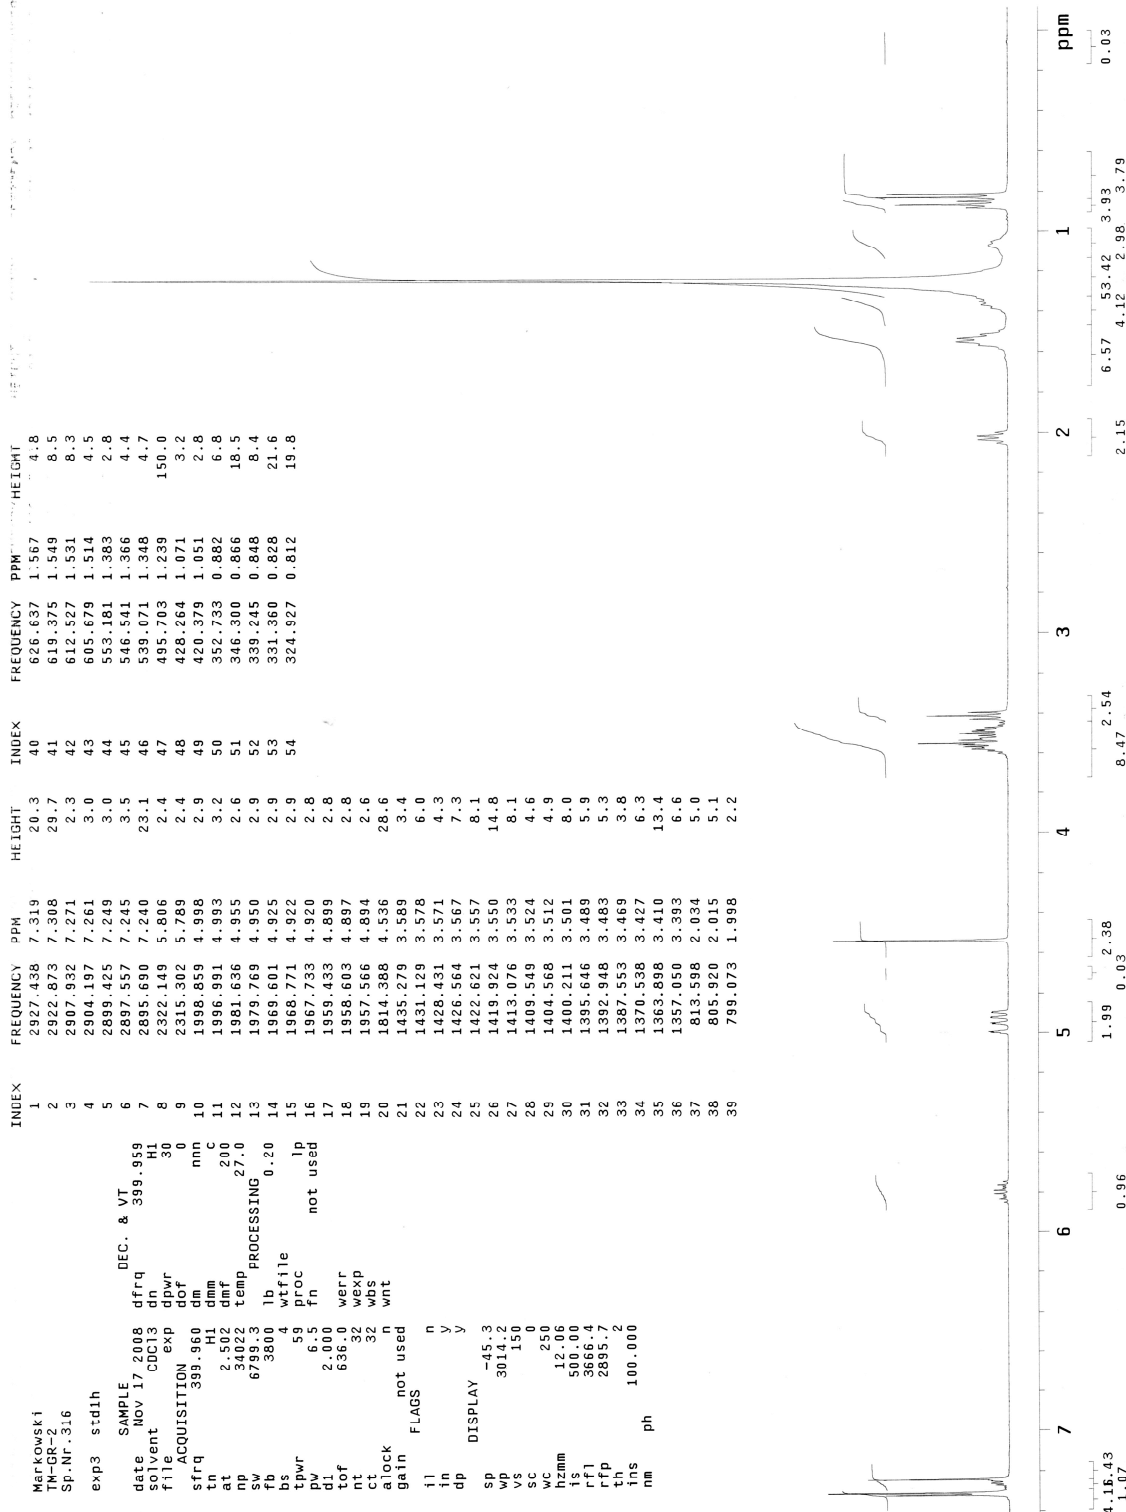



Compound 19b:  $^{13}\text{C}$ -NMR

Markowski\_1030\_TH-OR-2

```

expl s2pul
SAMPLE
date Dec 11 2008 temp 27.0
solvent cdcl3 gain not used
file /export/home/~spn 20
nmr1/auto/rt12/11~het 0.008
a/Markowski_1030_0~pw90 8.400
ACQUISITION 1 alfa 20.000
  sw 25142.3 il n
  at 11311 in v
  pd 65908 dp v
  fd 13800 hs nn
  bs 16 PROCESSING
  d1 1.500 lb 1.00
  nt 1024 fn 131072
  ct 448 DISPLAY
TRANSMITTER C13 sp
tn sfrq 100.580 rfn 15414.2
tofr 15671 rfp 1508.5
tpwr 4.200 lp 111.3
pw DECOUPLER H1 wc 250
dn 0 sc 0
dm vvy vs 46
dmm w th 4
dpwr 45 ai ph
dmf 11828
  
```

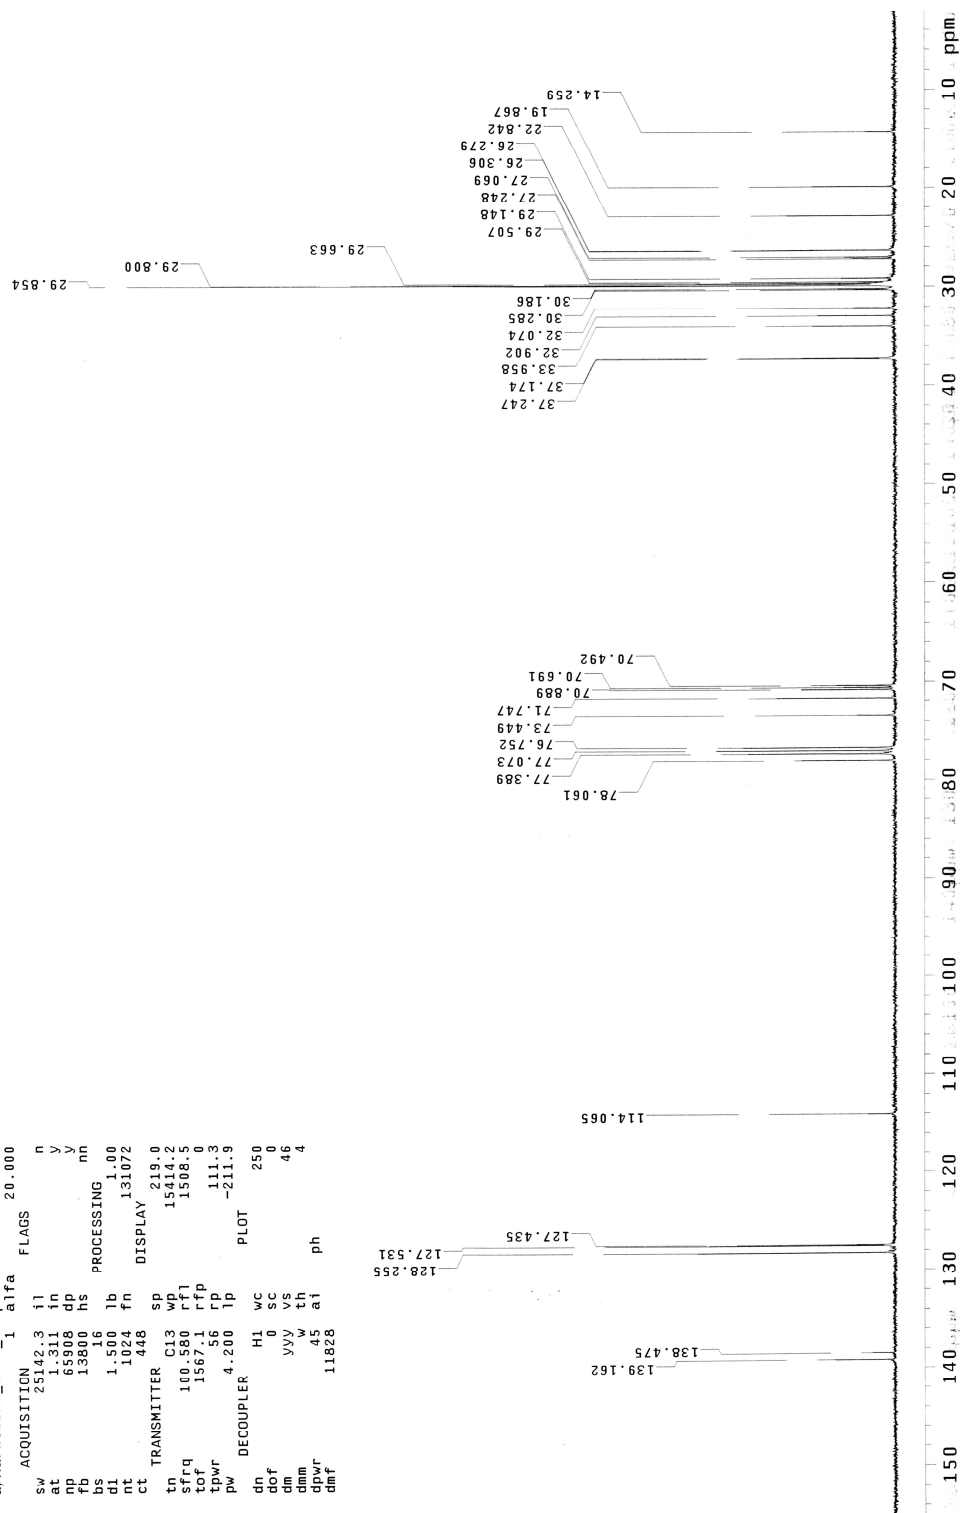

Markowski  
TM-GR3  
Nr. 1521

| exp3        | stdlh       | SAMPLE | DEC. & VT  |
|-------------|-------------|--------|------------|
| date        | Jan 20 2009 | dfrq   | 399.959    |
| solvent     | COC13       | dn     | H1         |
| file        | exp         | dprw   | 30         |
| ACQUISITION |             | dof    | 0          |
| nsfrq       | 399.960     | dm     | nnn        |
| atn         | H1          | dmm    | 200        |
| trn         | 2.502       | dmr    | c          |
| np          | 34022       | temp   | 27.0       |
| sw          | 67380       | lb     | PROCESSING |
| ba          | 3800        | lb     | 0.20       |
| tw          | 4           | wfile  |            |
| tpwr        | 59          | fn     | lp         |
| pdv         | 6.0         | fn     | not used   |
| d1          | 2.000       | werr   |            |
| tof         | 636.0       | wexp   |            |
| nt          | 32          | wps    |            |
| ct          | 32          | wnt    |            |
| aack        | n           |        |            |
| gain        | not used    |        |            |
| FLAGS       |             |        |            |
| il          | n           |        |            |
| dp          | y           |        |            |
| dp          | y           |        |            |
| DISPLAY     |             |        |            |
| sp          | -164.4      |        |            |
| wp          | 3370.3      |        |            |
| vs          | 151         |        |            |
| sc          | 0           |        |            |
| wc          | 250         |        |            |
| hzmm        |             |        |            |
| ls          | 13.48       |        |            |
| rs          | 36932       |        |            |
| rf          | 772.0       |        |            |
| rr          | 0           |        |            |
| rt          | 1           |        |            |
| ins         | 100.000     |        |            |
| nm          | cdc         |        |            |
| ph          |             |        |            |

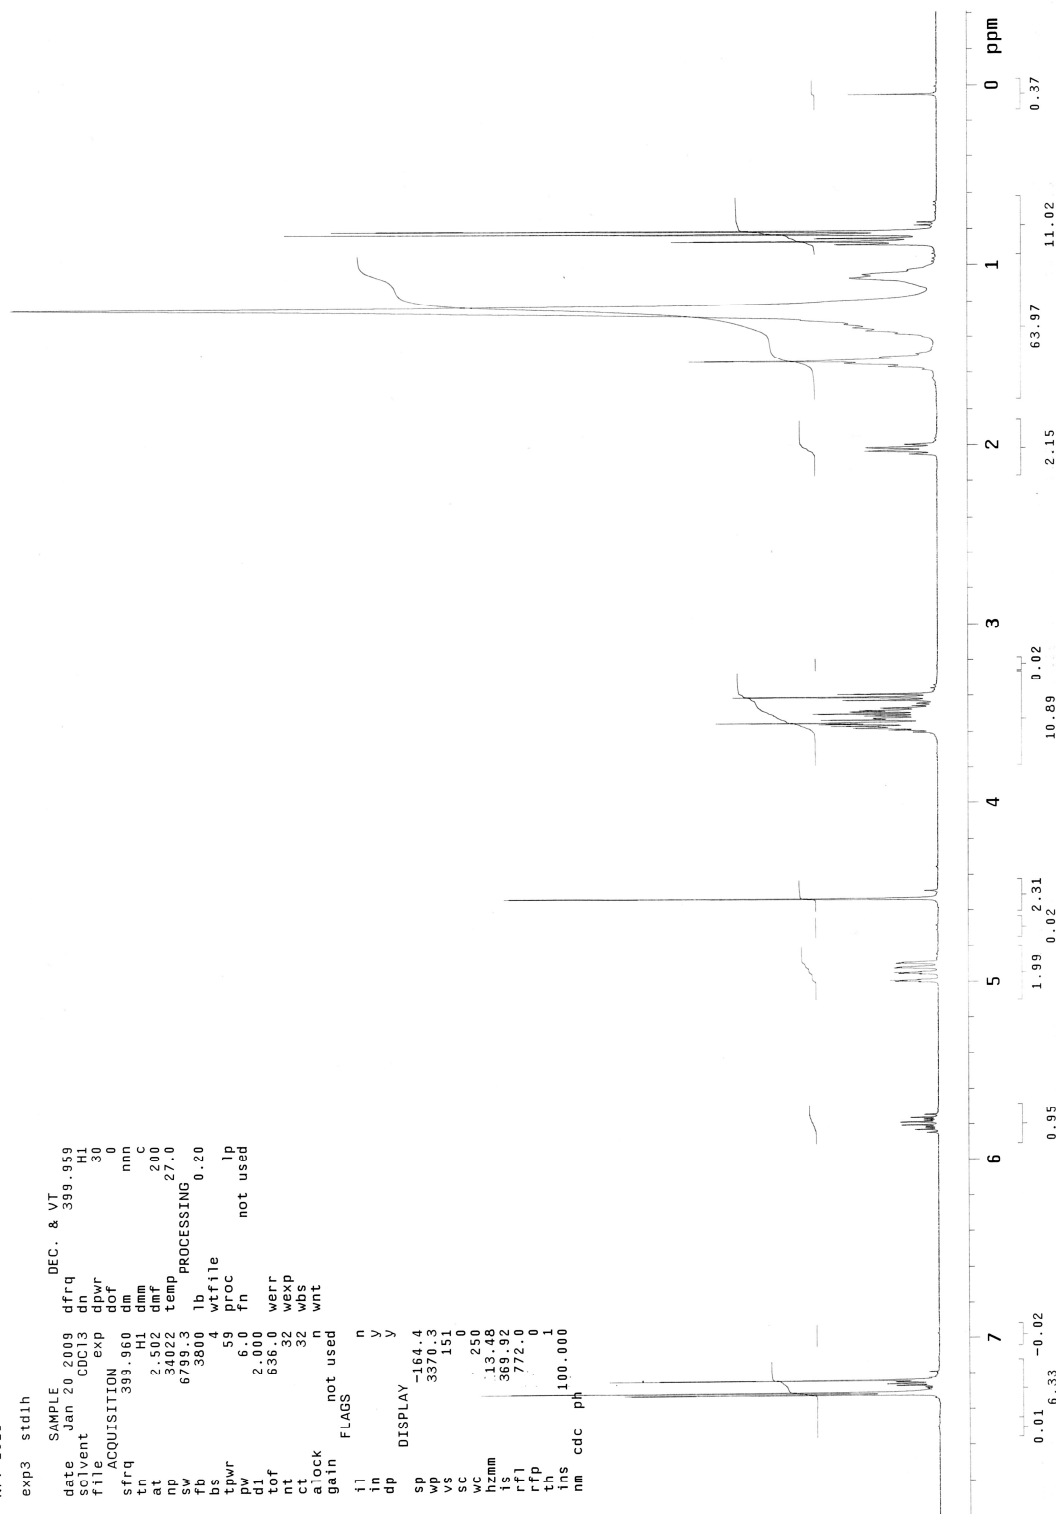

# Compound 19c: <sup>13</sup>C-NMR

exp7 s2pu1

Markowski\_649\_TM-GR-3

SAMPLE SPECIAL 27.0  
 date Sep 3 2009 temp not used  
 solvent cdcl3 gain 20  
 file /export/home/~spin 0.008  
 vmr1/auto/rts/2/M~bst 9.400  
 arkowski\_649\_01 pw90 20.000  
 ACQUISITION alfa  
 sw 25142.3  
 at 1.311 fl  
 np 65908 in  
 fb 13800 dp  
 bs 16 hs  
 dl 1.504  
 ct 1024 lb  
 ct 448 fn  
 TRANSMITTER C13 SP  
 tn -59.9  
 sfrq 100.580 wp  
 tof 16170.7  
 tpwr 1567.1 rfl  
 pw 55 rfp  
 pv 4.700 lp  
 DECOUPLER H1  
 dn 0 wc  
 dof 0 vs  
 dm yy  
 dm 34 th  
 dmr 10056 ai  
 dmf 2  
 ph

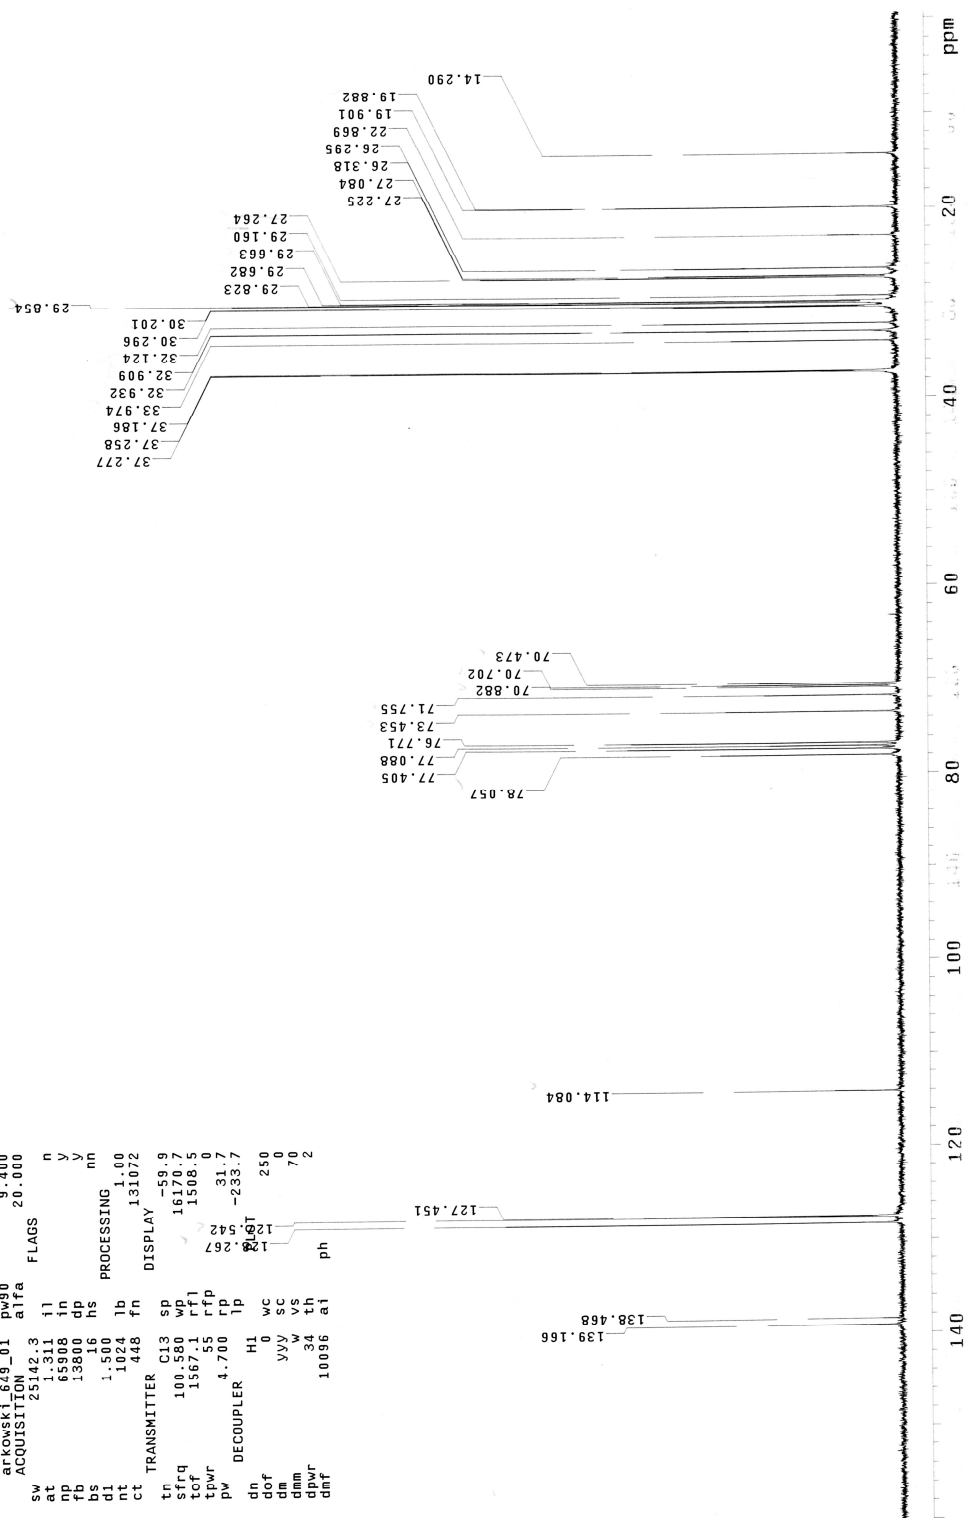

*Compound 20a:*  $^1\text{H}$  NMR

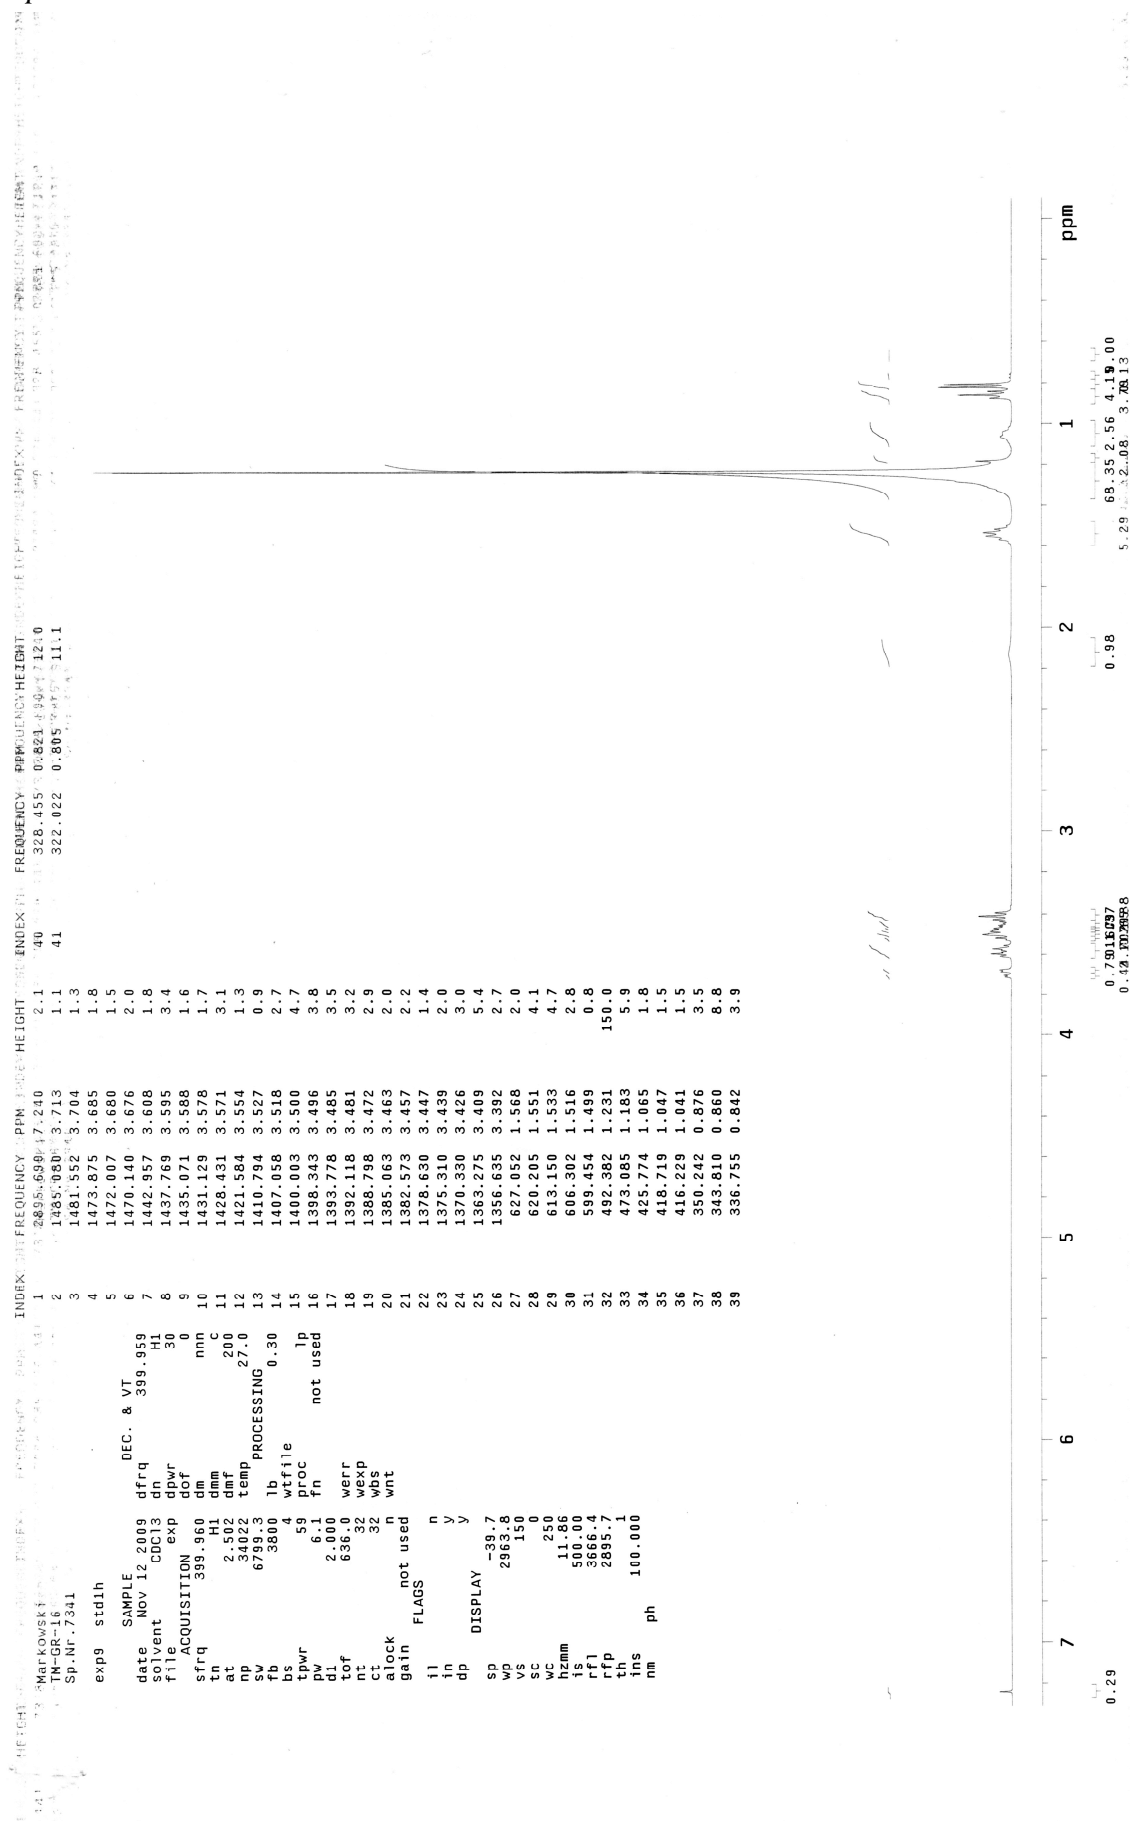

*Compound 20a:*  $^{13}\text{C}$  NMR

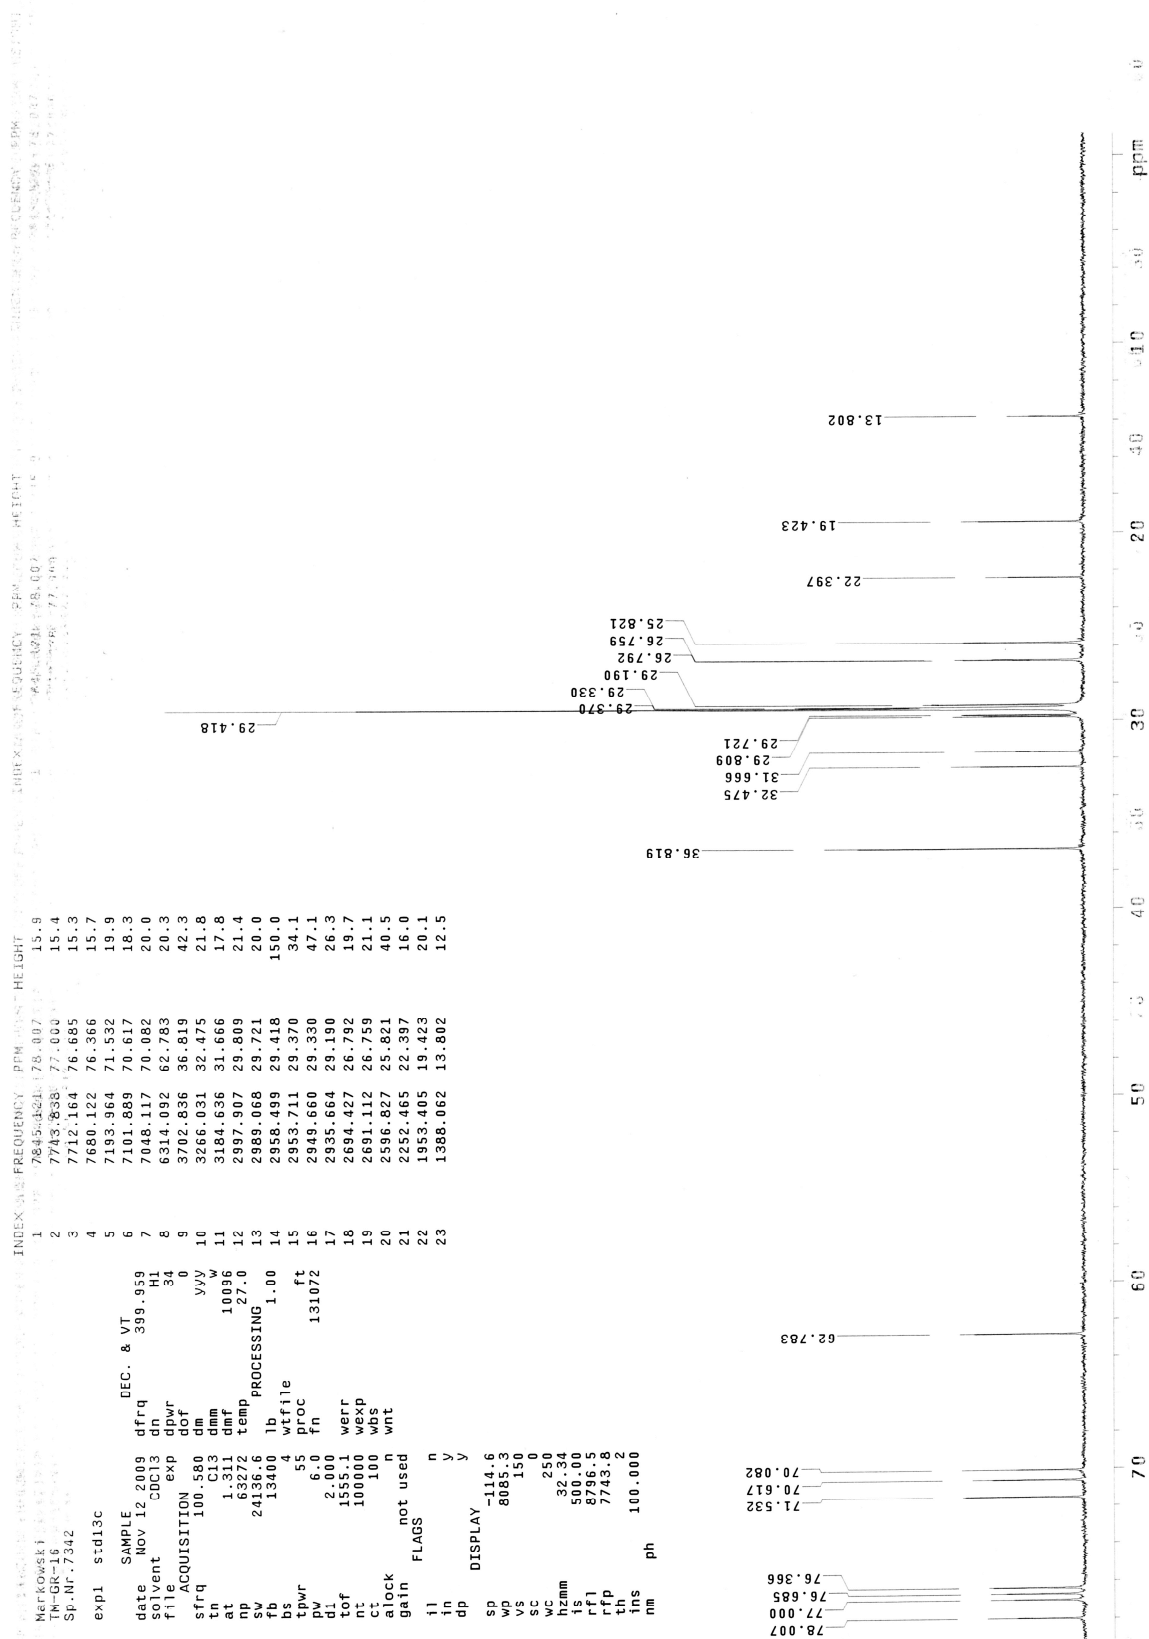

# Compound 20b: <sup>1</sup>H NMR

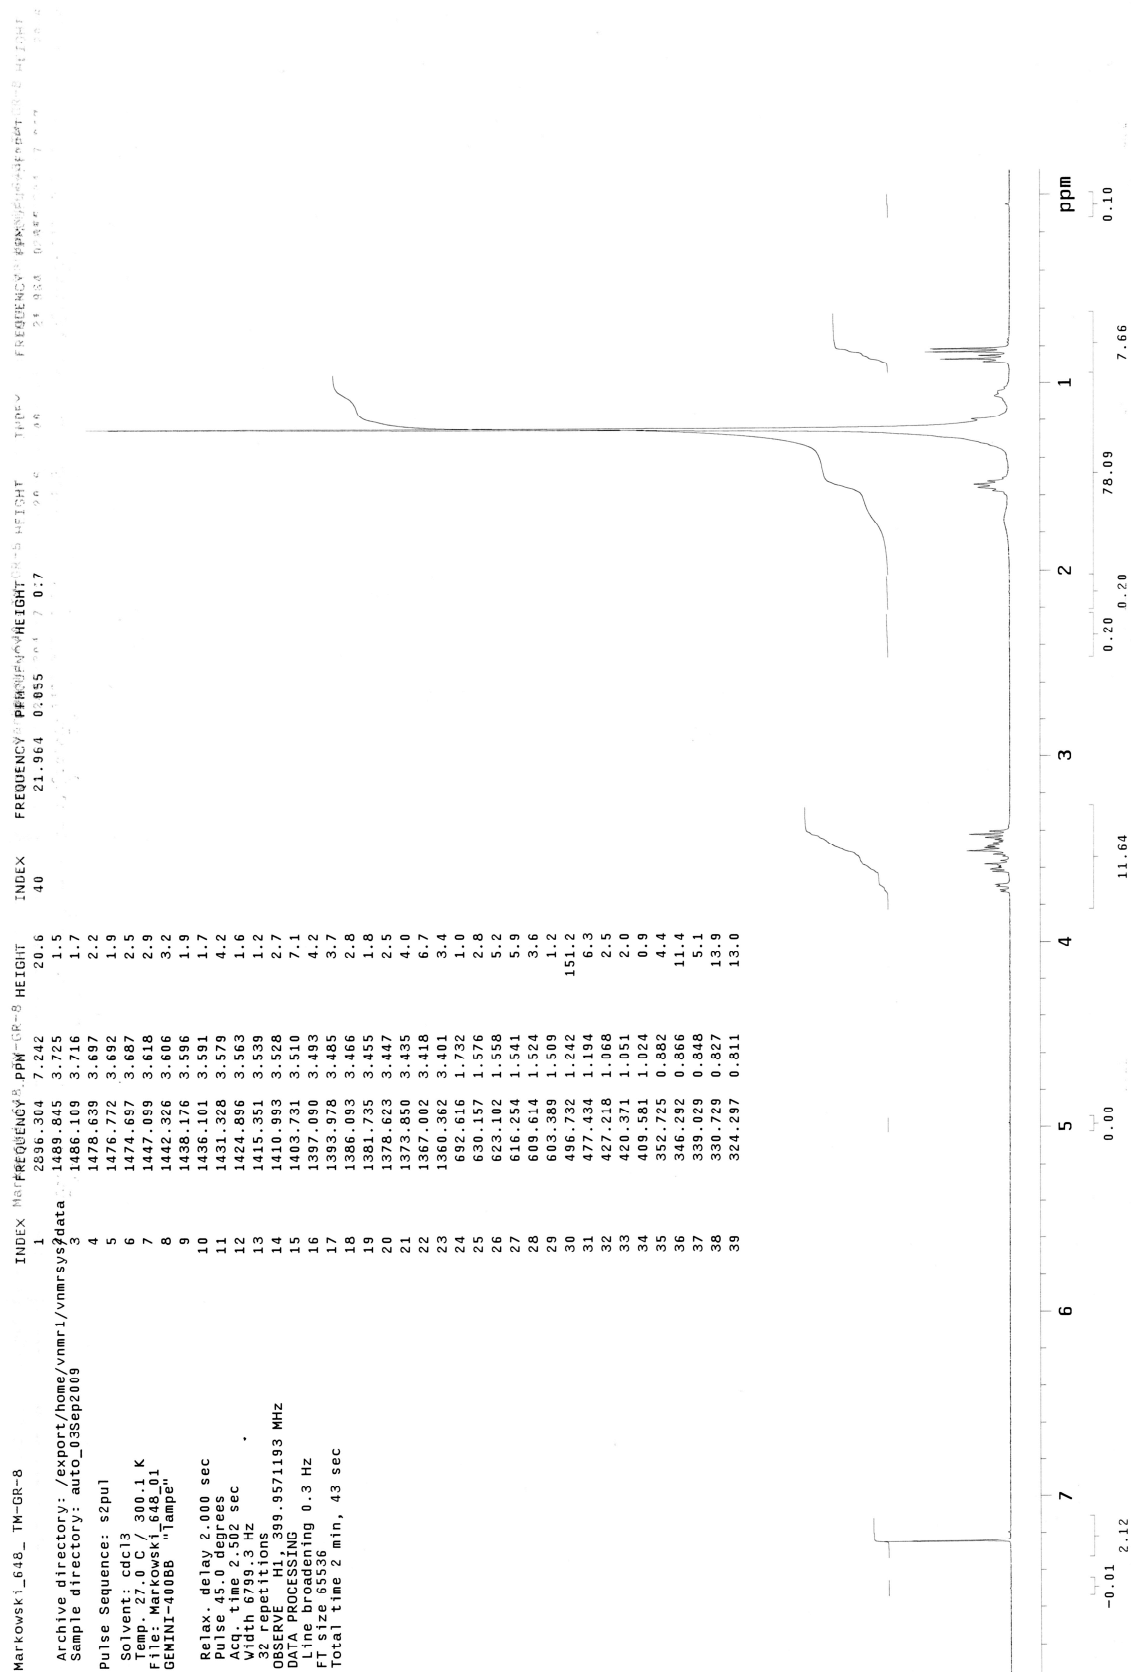

Compound 20b:  $^{13}\text{C}$  NMR

Markowski\_3980\_TM-GR-8

```

exp1 szpul1
SAMPLE
date May 15 2009 temp 27.0
solvent not used
file /export/home/~
vmr1/autos/15/~
Markowski_3980_01 hst 0.008
sv ACQUISIT 20.000
alifa 20.000
FLAGS
at 1.311 il n
np 55908 in y
fb 13800 dp y
bs 16 hs nn
d1 1.500 PROCESSING
nt 1024 lb 1.00
ct 1024 fn DISPLAY 131072
tn C13 SP -39.9
sfreq 100.580 wf 10081.5
cor 156745 fl 1508.5
tpwr 4.700 rfp 29.7
pv DECOUPLER lp -216.4
dn H1 PLOT
dof 0 wc 250
dn yyv sc 0
dnn w vs 37
dpwr 34 th 2
dmf 10096 ai ph
  
```

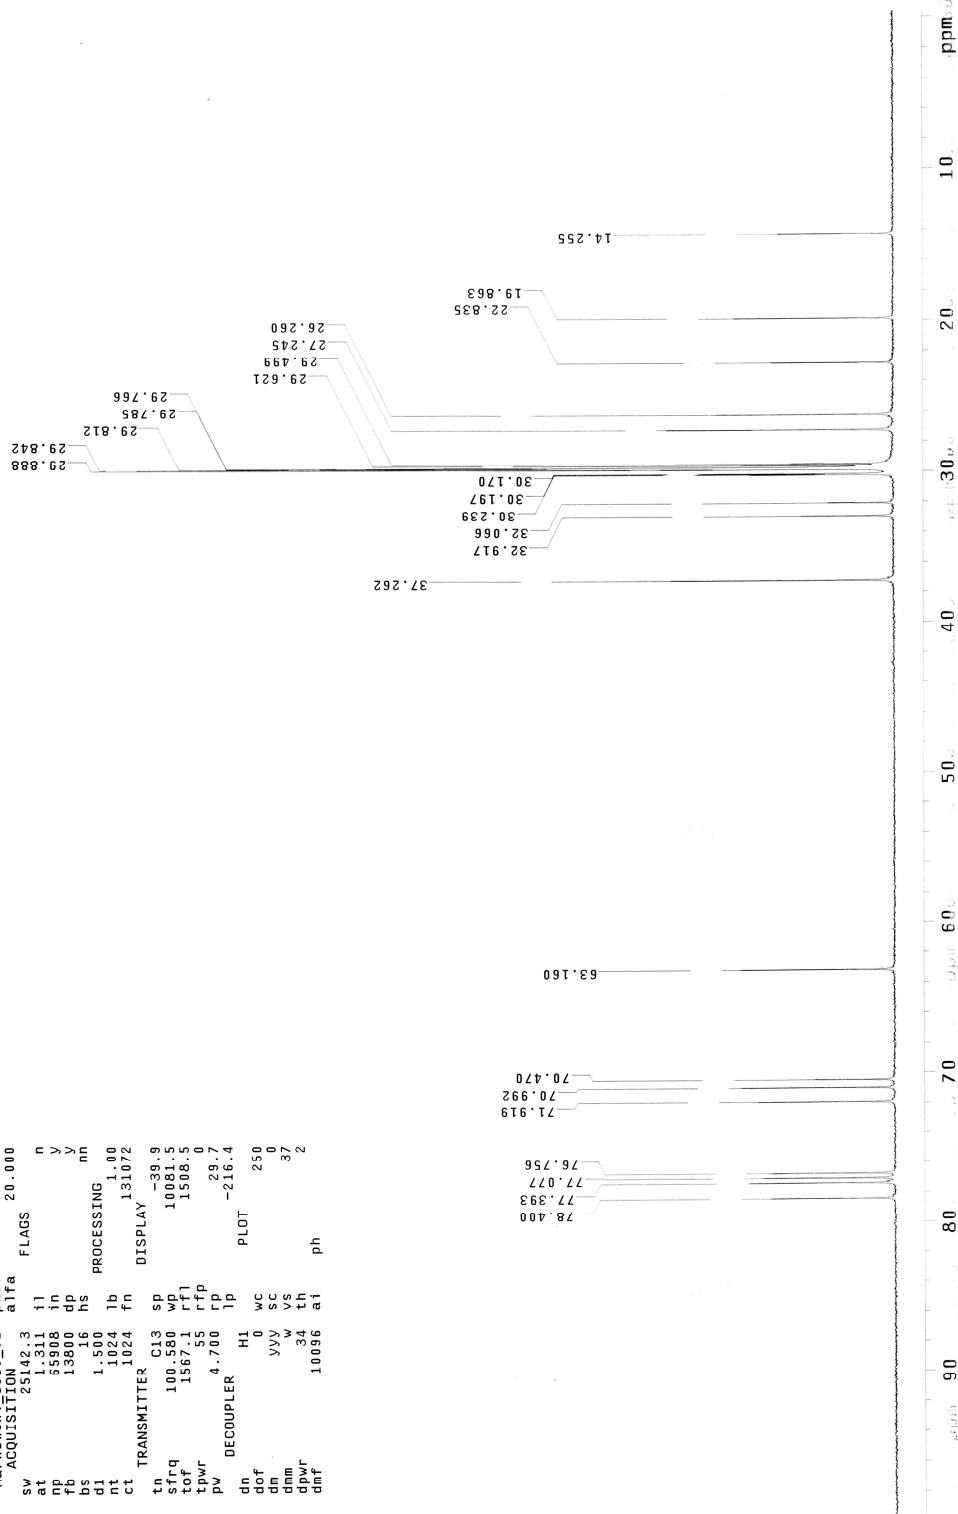

# Compound 20c: <sup>1</sup>H NMR

Markowski  
TM-CR-5a  
Nr. 2180

Pulse Sequence: s2pul

Solvent: CDCl<sub>3</sub>

Temp. 27.0 C / 300.1 K

GEMINI-400BB "1ampe"

Relax. delay 2.000 sec

Pulse 45.0 degrees

Acq. time 2.502 sec

Width 6799.3 Hz

32 repetitions

OBSERVE H1, 399.9571193 MHz

DATA PROCESSING

Line broadening 0.3 Hz

FT size 83396

Total time 2 min, 43 sec

| INDEX | FREQUENCY - PPM | HEIGHT |
|-------|-----------------|--------|
| 1     | 2895.346 7.238  | 70.0   |
| 2     | 2875.333 7.189  | 1.5    |
| 3     | 1488.794 3.722  | 3.0    |
| 4     | 1485.474 3.714  | 3.5    |
| 5     | 1477.589 3.694  | 5.0    |
| 6     | 1473.854 3.685  | 5.2    |
| 7     | 1446.463 3.617  | 6.1    |
| 8     | 1441.368 3.603  | 6.9    |
| 9     | 1437.541 3.594  | 4.4    |
| 10    | 1430.593 3.577  | 8.7    |
| 11    | 1424.053 3.561  | 3.3    |
| 12    | 1414.508 3.537  | 2.8    |
| 13    | 1410.358 3.526  | 5.9    |
| 14    | 1402.580 3.507  | 15.0   |
| 15    | 1396.040 3.490  | 9.0    |
| 16    | 1392.327 3.483  | 8.4    |
| 17    | 1385.042 3.463  | 6.2    |
| 18    | 1380.892 3.453  | 4.4    |
| 19    | 1377.364 3.444  | 5.8    |
| 20    | 1372.799 3.432  | 9.0    |
| 21    | 1366.159 3.416  | 14.3   |
| 22    | 1359.312 3.399  | 7.1    |
| 23    | 845.118 2.113   | 1.0    |
| 24    | 628.899 1.572   | 6.8    |
| 25    | 622.466 1.556   | 12.3   |
| 26    | 615.411 1.539   | 13.6   |
| 27    | 608.564 1.522   | 8.6    |
| 28    | 495.582 1.239   | 151.2  |
| 29    | 426.168 1.066   | 9.9    |
| 30    | 419.943 1.050   | 8.5    |
| 31    | 352.297 0.881   | 9.7    |
| 32    | 345.864 0.865   | 22.7   |
| 33    | 338.809 0.847   | 10.8   |
| 34    | 329.586 0.825   | 52.3   |
| 35    | 323.454 0.809   | 48.6   |
| 36    | 309.966 0.775   | 1.4    |
| 37    | 303.741 0.759   | 1.1    |

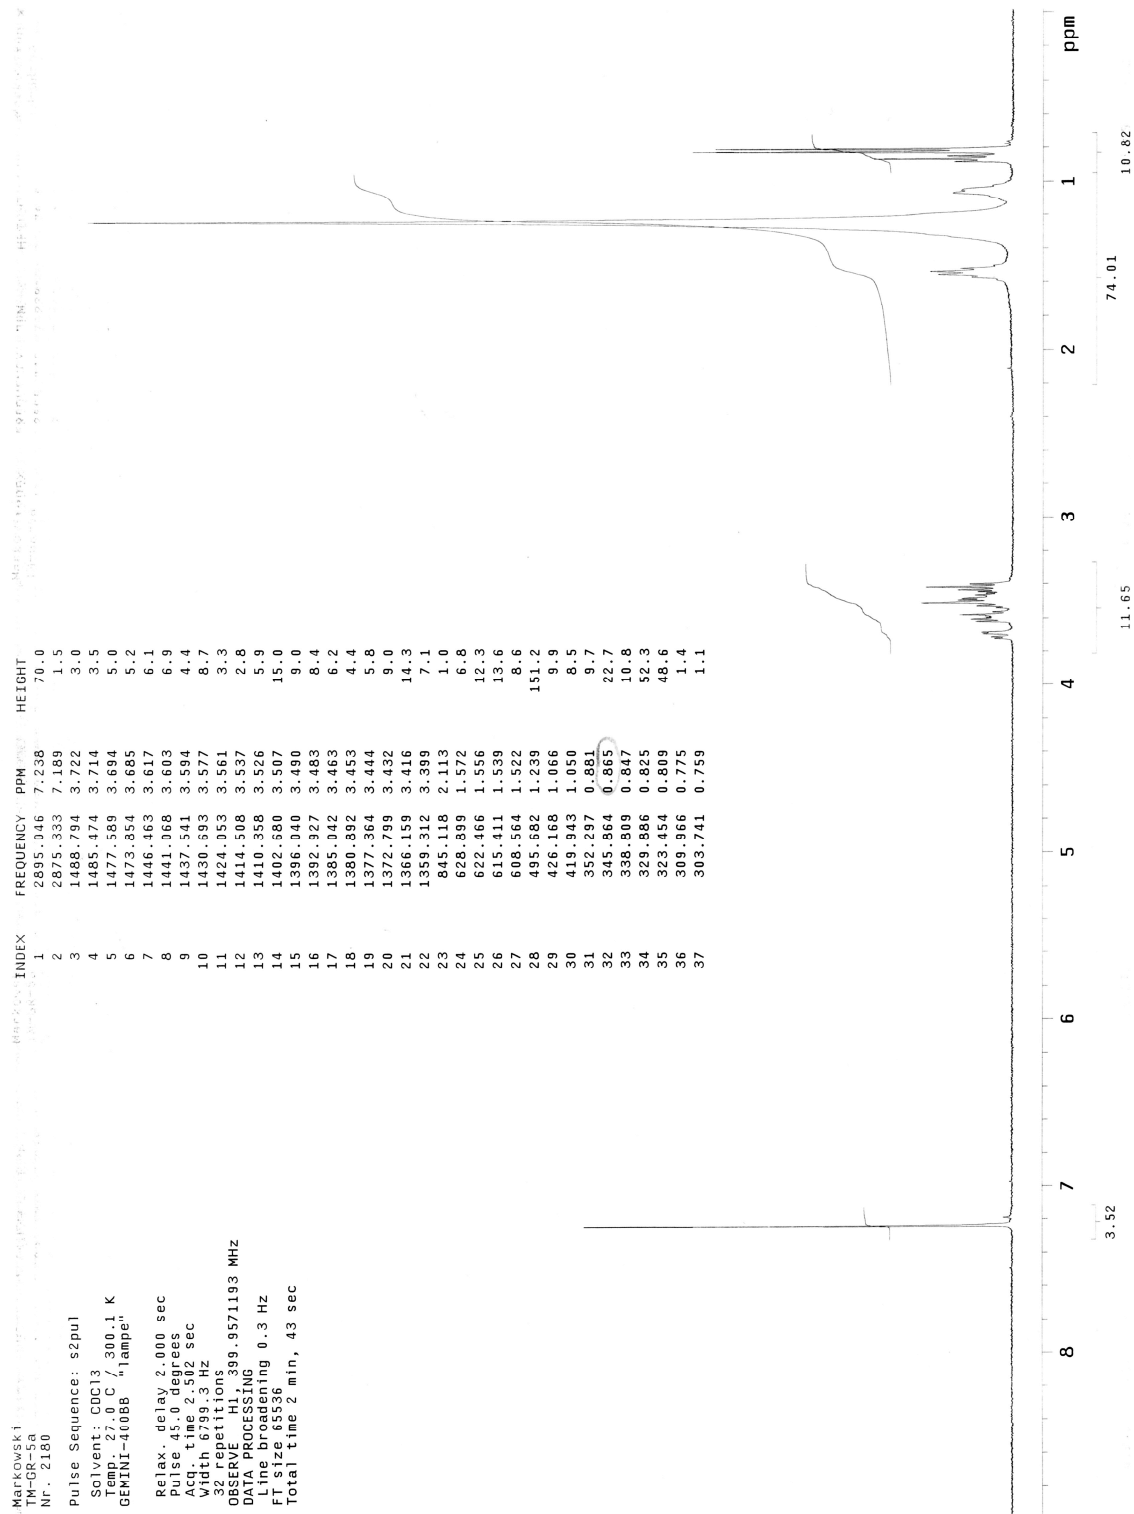



2000

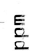

Compound 22a: <sup>1</sup>H NMR

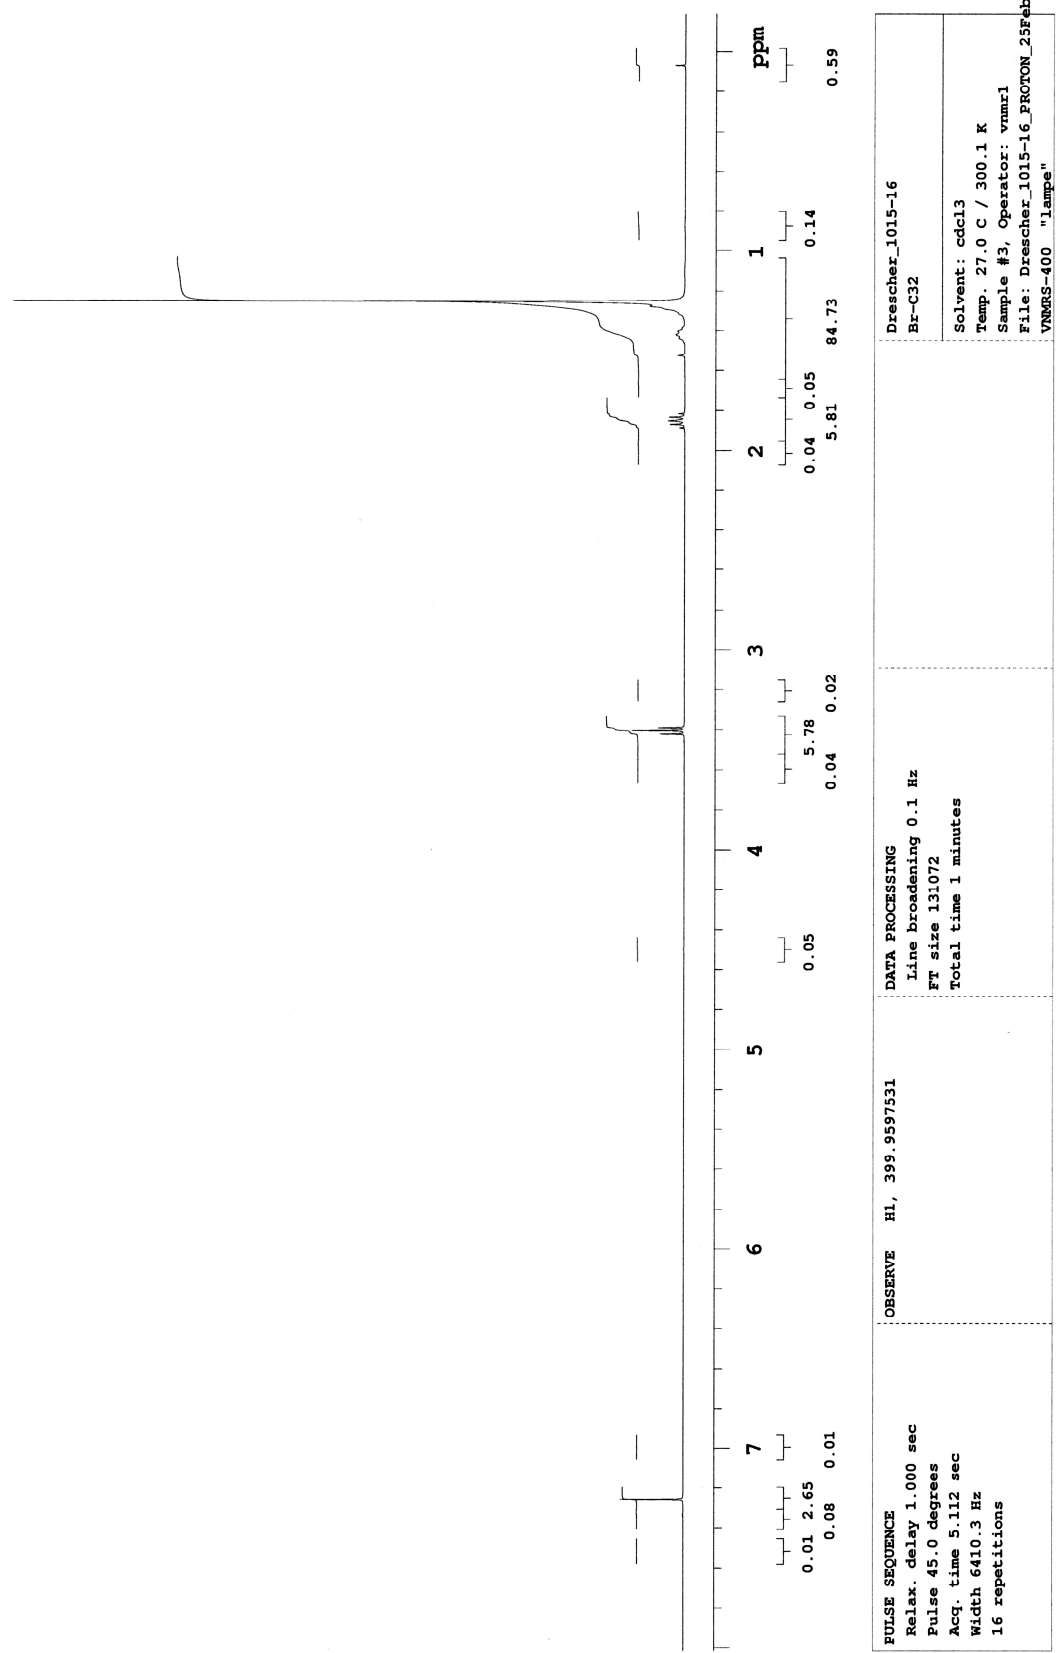

Compound 22a: <sup>13</sup>C NMR

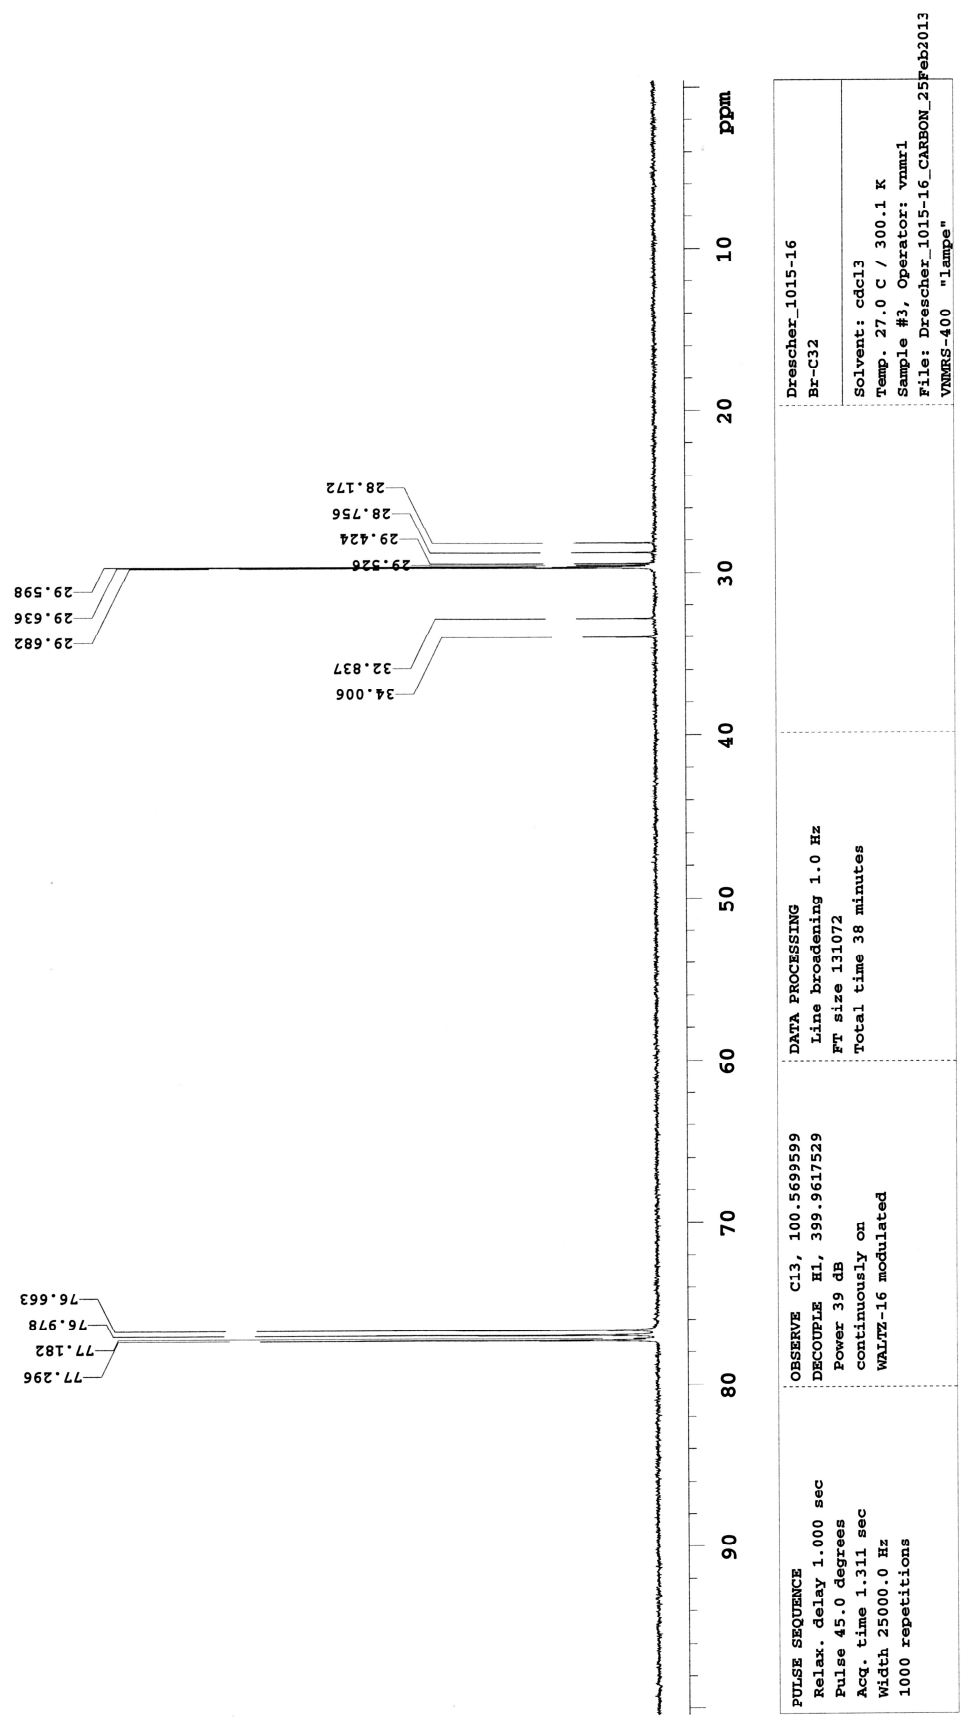

**Compound 22b: ESI-MS, positive mode**

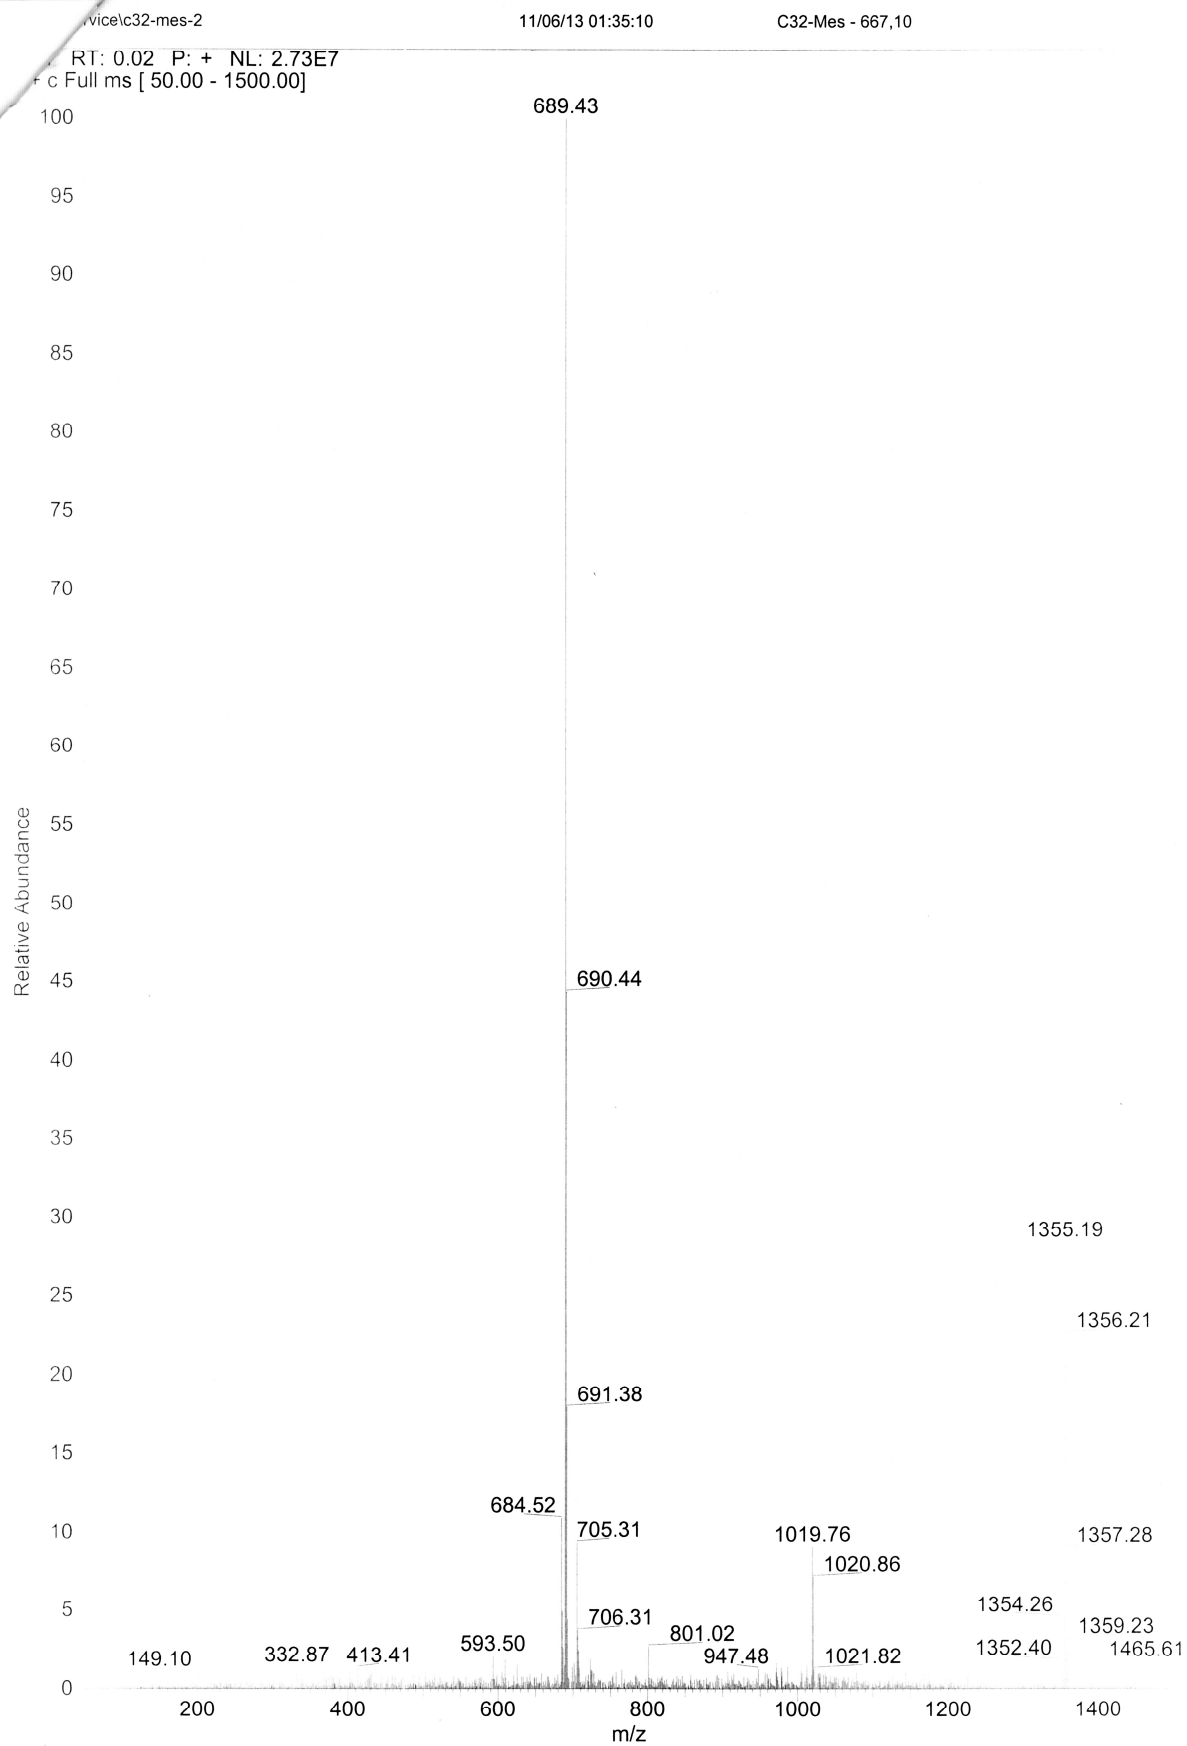

Compound 22b: <sup>1</sup>H NMR

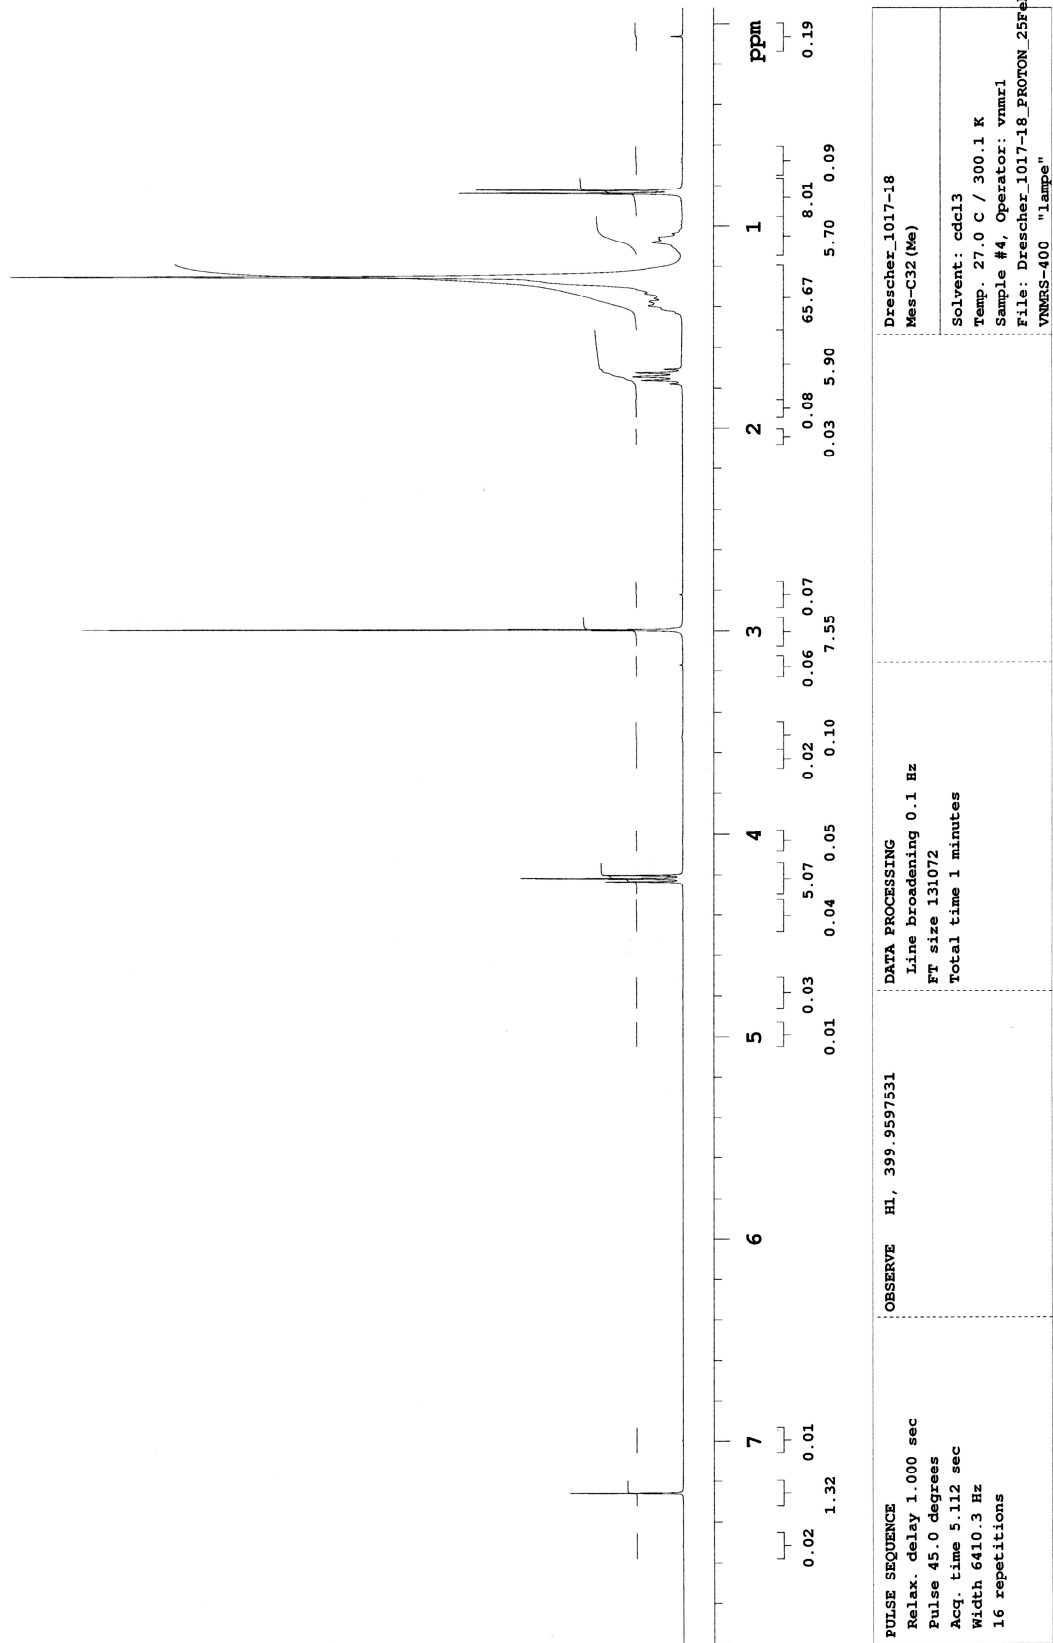

Compound 22b: <sup>13</sup>C NMR

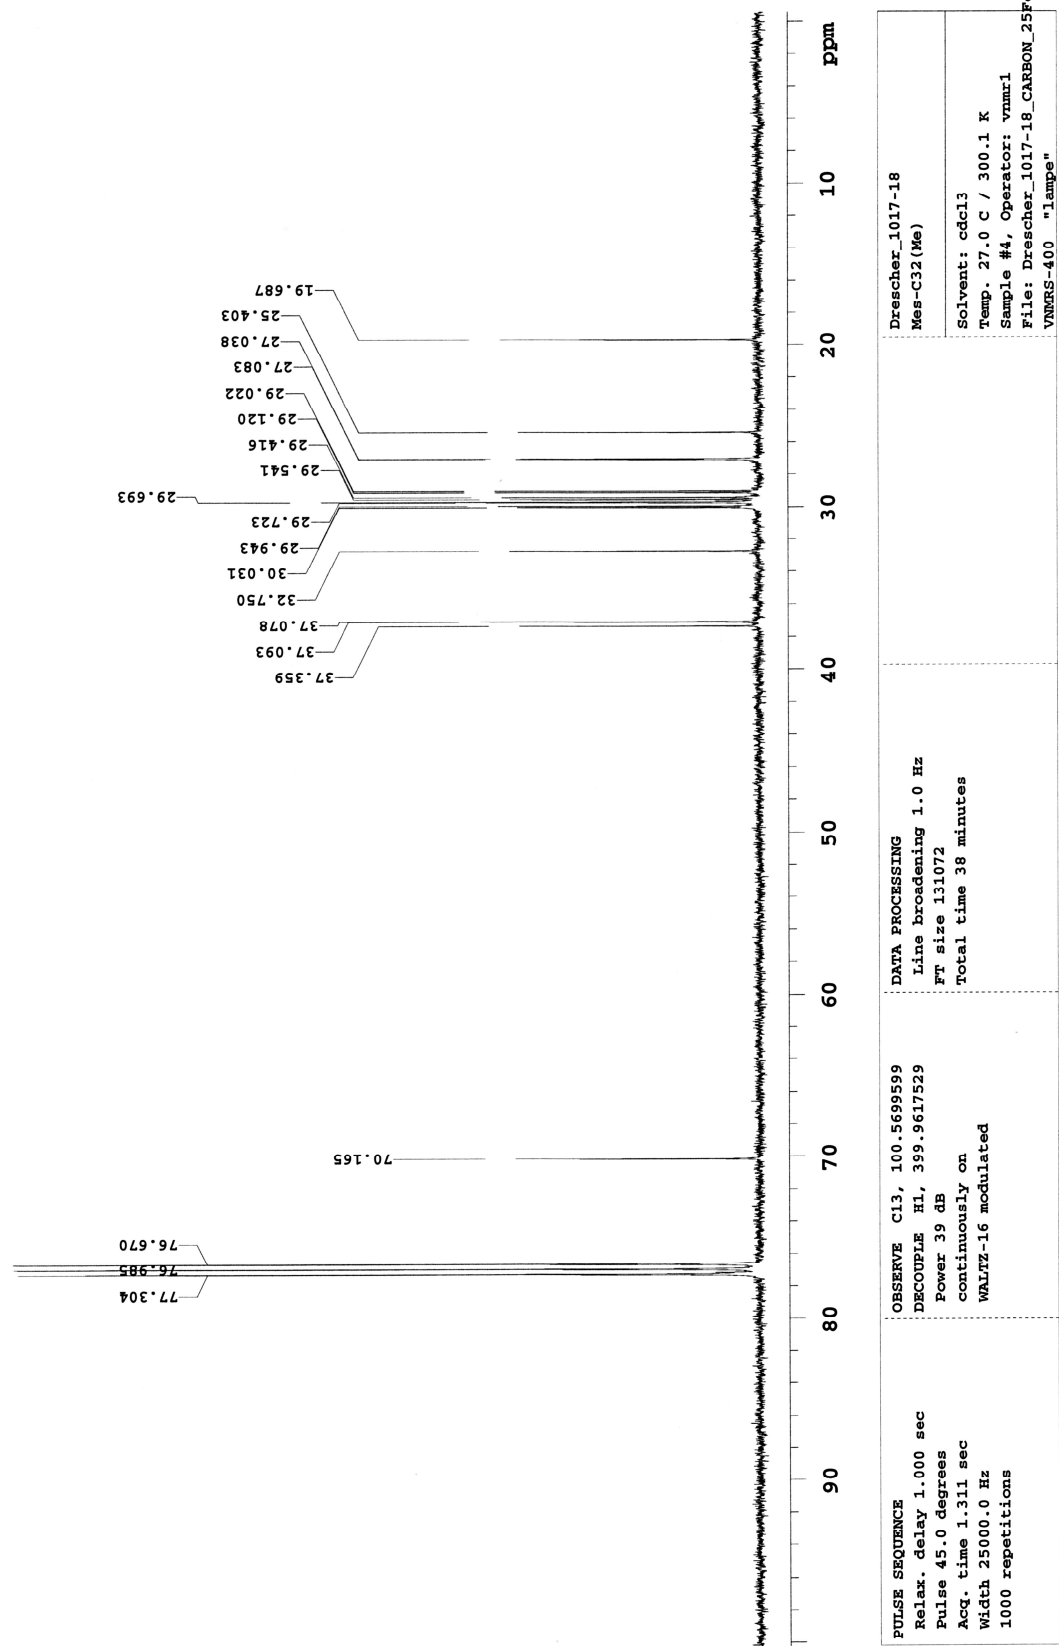

Compound **23a**: ESI-MS, positive mode

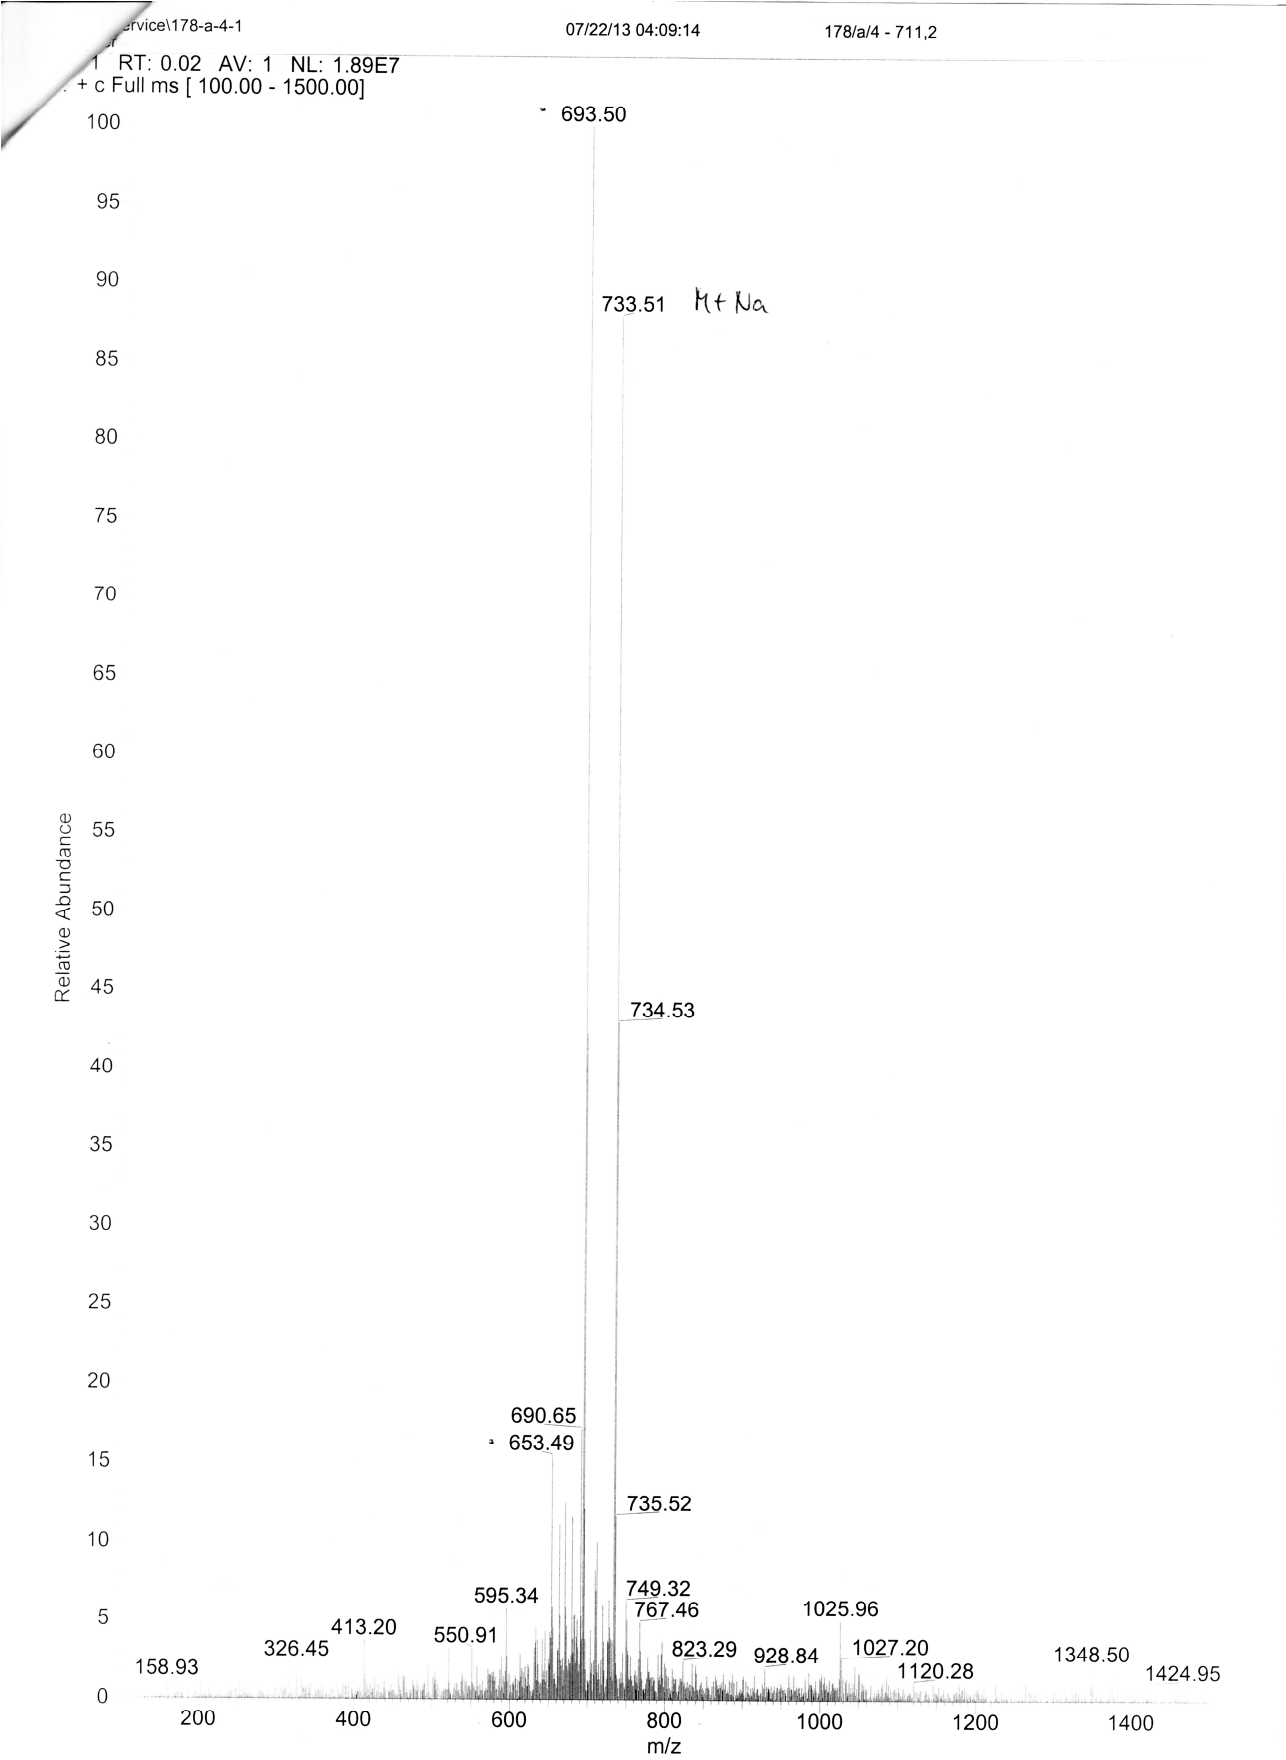

Compound 23a: <sup>1</sup>H NMR

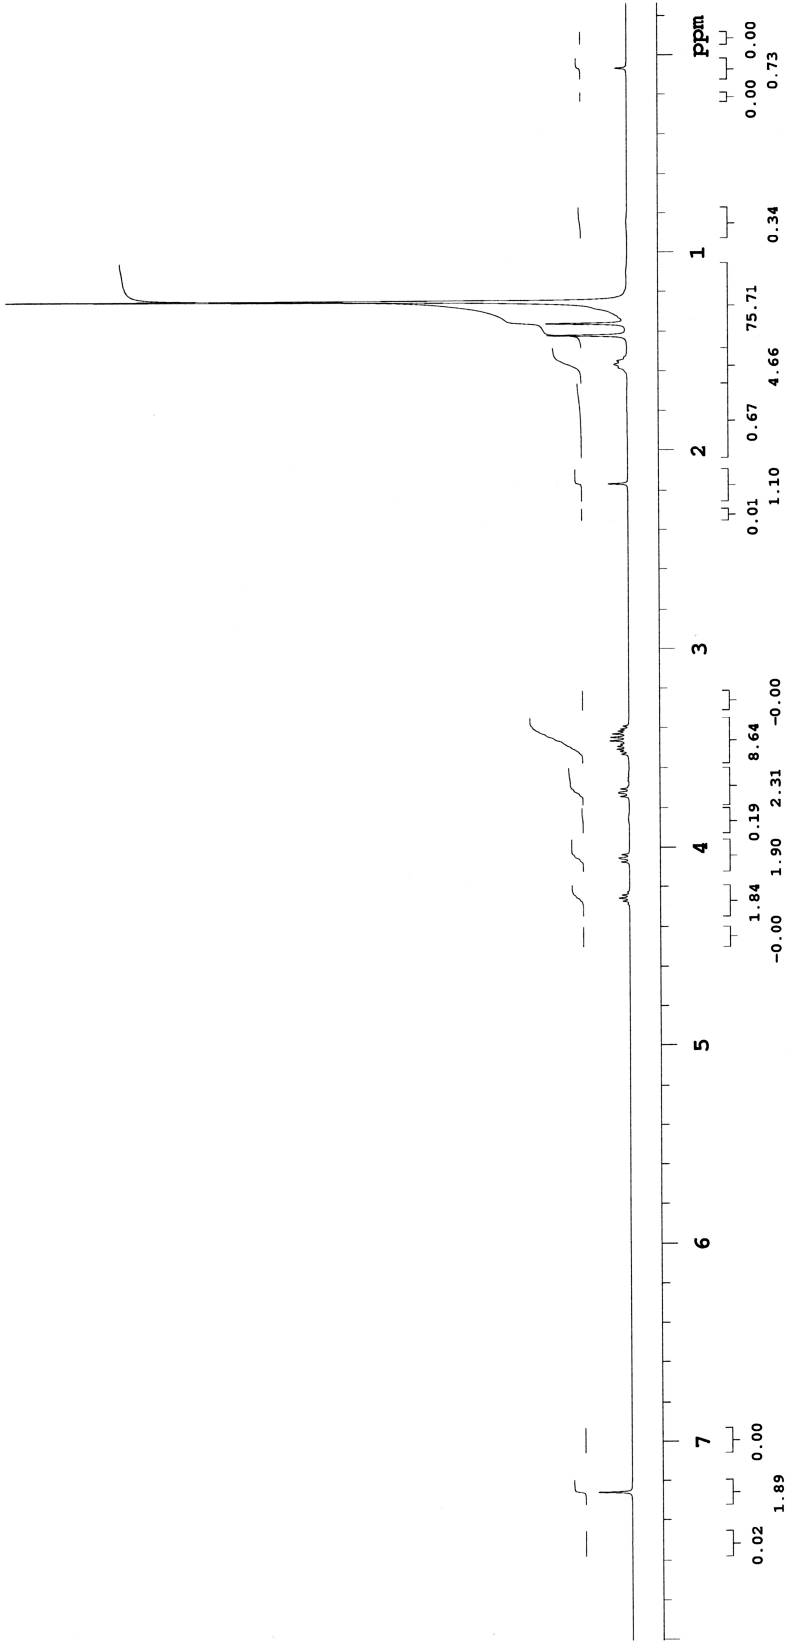

|                                                                                                                                   |                                |                                                                                            |                                                                                                                                |
|-----------------------------------------------------------------------------------------------------------------------------------|--------------------------------|--------------------------------------------------------------------------------------------|--------------------------------------------------------------------------------------------------------------------------------|
| <b>PULSE SEQUENCE</b><br>Relax. delay 1.000 sec<br>Pulse 45.0 degrees<br>Acq. time 5.112 sec<br>Width 6410.3 Hz<br>16 repetitions | <b>OBSERVE</b> H1, 399.9597531 | <b>DATA PROCESSING</b><br>Line broadening 1.0 Hz<br>FT size 131072<br>Total time 1 minutes | <b>Drescher</b><br>178/a/4<br>Nr. 5978<br><br>Solvent: cdcl3<br>Temp. 27.0 C / 300.1 K<br>Operator: vnmr1<br>VNMRS-400 "lampe" |
|-----------------------------------------------------------------------------------------------------------------------------------|--------------------------------|--------------------------------------------------------------------------------------------|--------------------------------------------------------------------------------------------------------------------------------|



Compound 23a: <sup>13</sup>C NMR

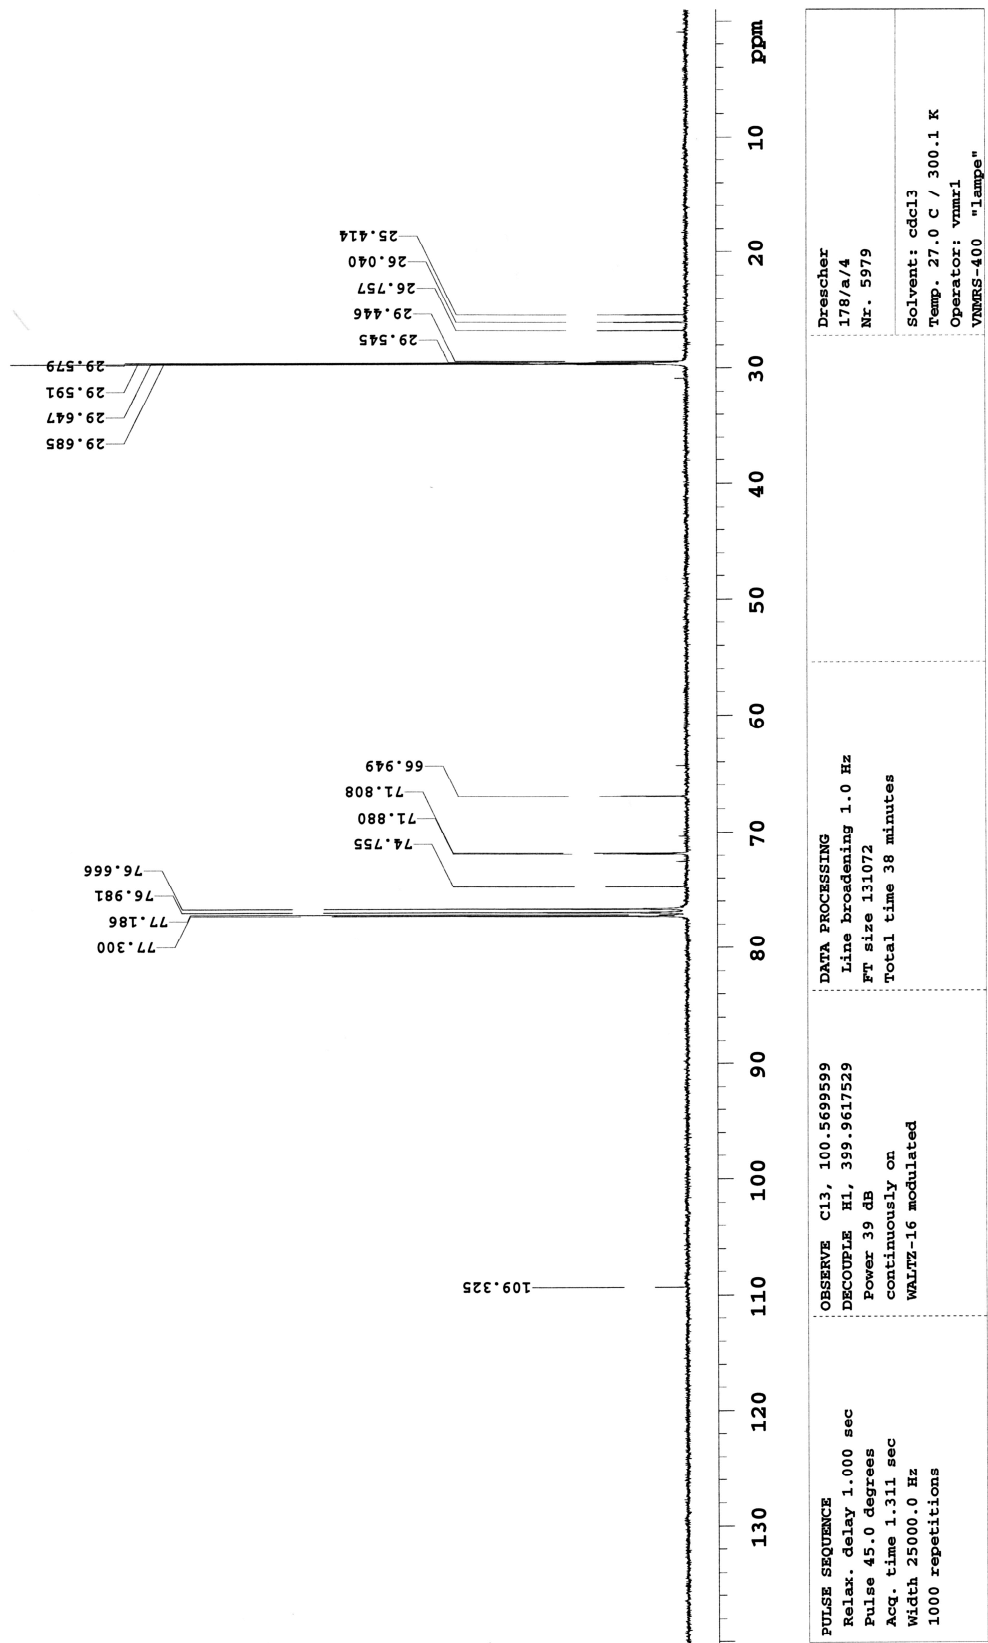

Compound **23b**: ESI-MS, positive mode

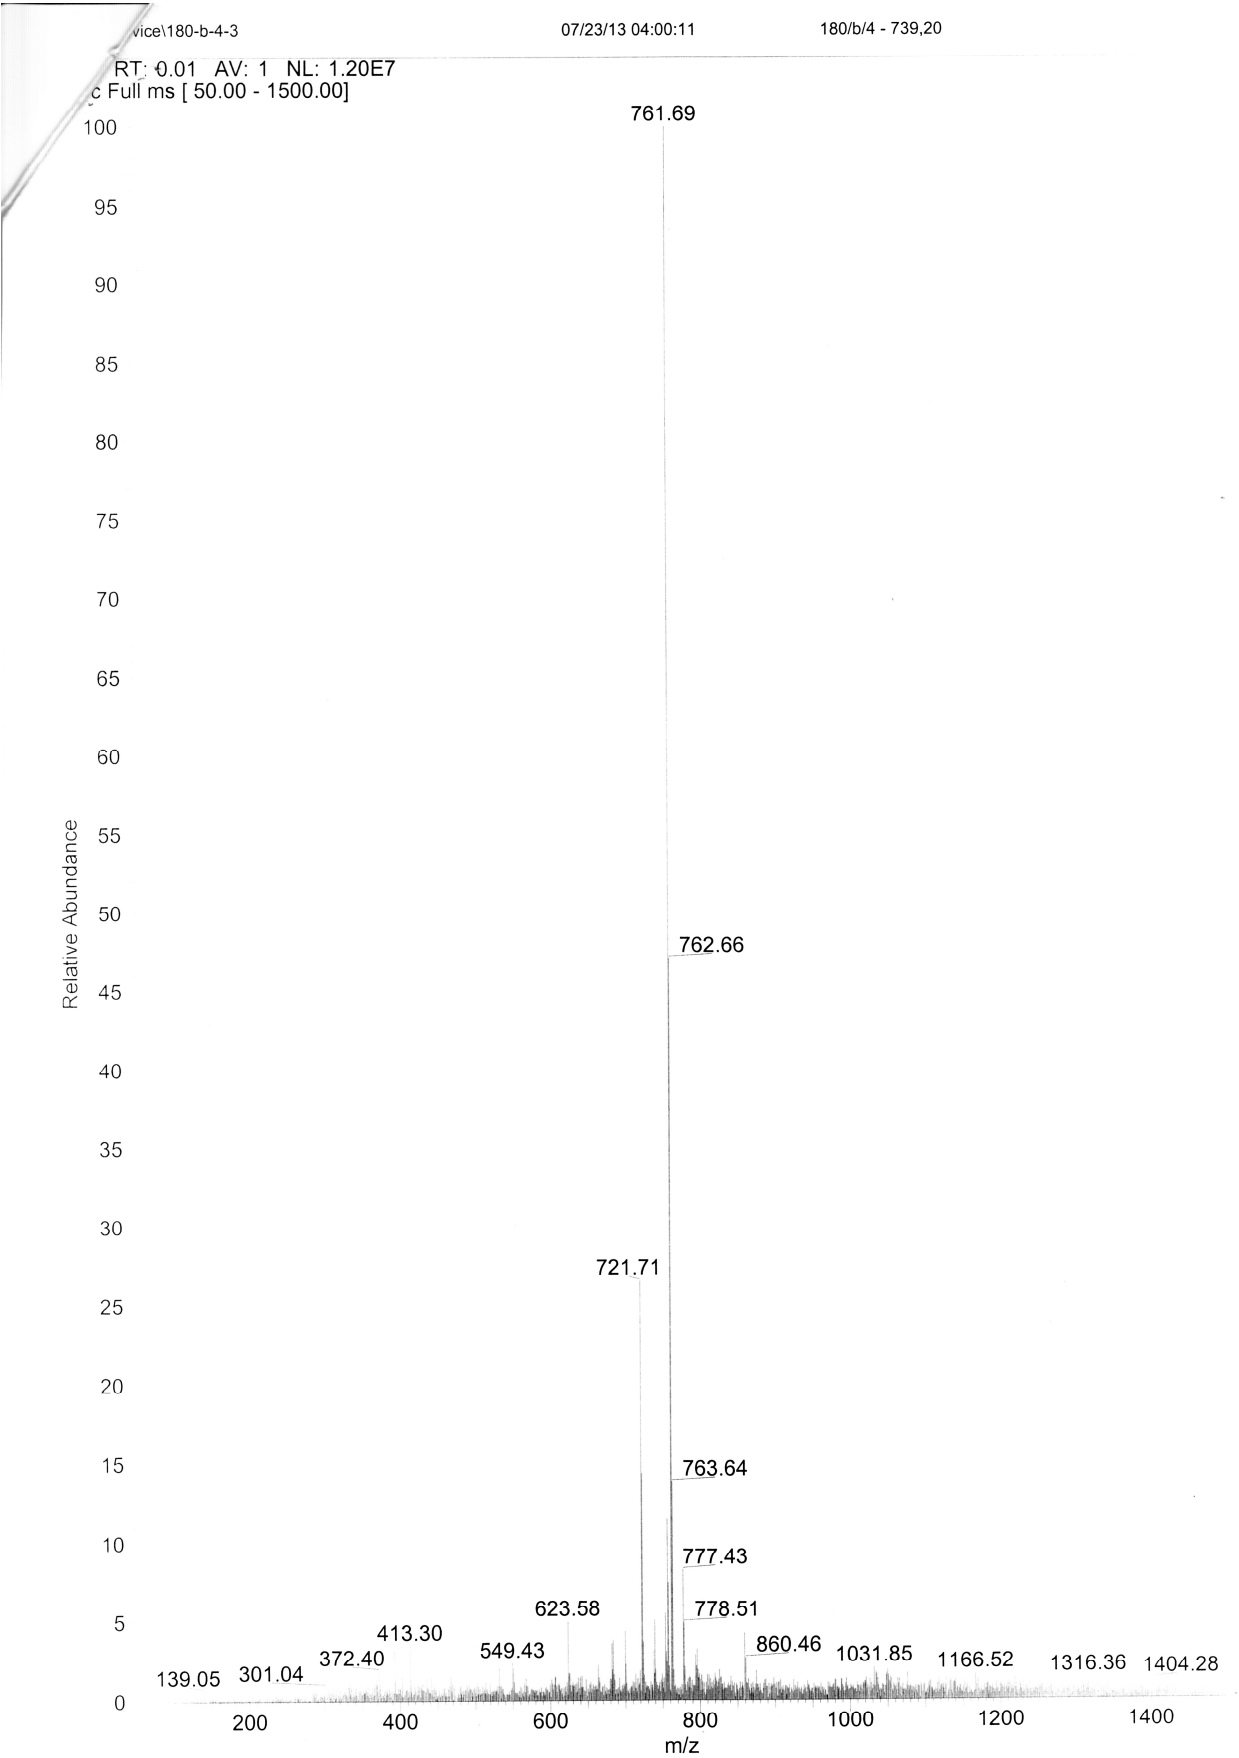

Compound 23b: <sup>1</sup>H NMR

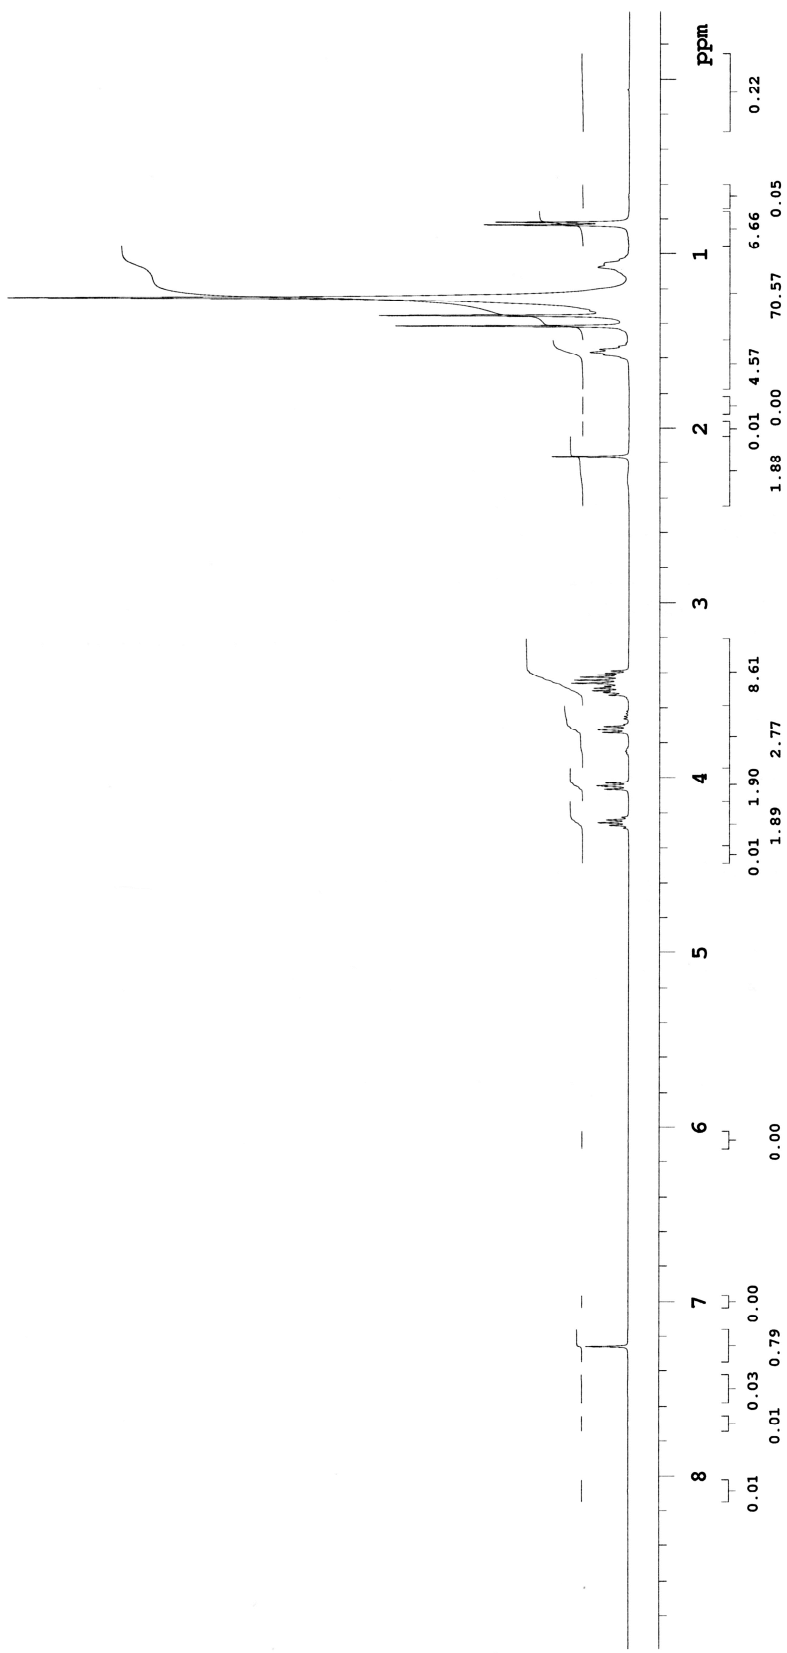

|                                                                                                                                                                               |                                               |                                                                                                                        |                                                                                                                                                                                |
|-------------------------------------------------------------------------------------------------------------------------------------------------------------------------------|-----------------------------------------------|------------------------------------------------------------------------------------------------------------------------|--------------------------------------------------------------------------------------------------------------------------------------------------------------------------------|
| <div>PULSE SEQUENCE</div> <div>Relax. delay 1.000 sec</div> <div>Pulse 45.0 degrees</div> <div>Acq. time 5.112 sec</div> <div>Width 6410.3 Hz</div> <div>16 repetitions</div> | <div>OBSERVE</div> <div>H1, 399.9597531</div> | <div>DATA PROCESSING</div> <div>Line broadening 1.0 Hz</div> <div>FT size 131072</div> <div>Total time 1 minutes</div> | <div>Drescher</div> <div>180/b/4</div> <div>Nr. 6078</div> <div>Solvent: cdcl3</div> <div>Temp. 27.0 C / 300.1 K</div> <div>Operator: vnmr1</div> <div>VNMRS-400 "lampe"</div> |
|-------------------------------------------------------------------------------------------------------------------------------------------------------------------------------|-----------------------------------------------|------------------------------------------------------------------------------------------------------------------------|--------------------------------------------------------------------------------------------------------------------------------------------------------------------------------|

Compound 23b: <sup>13</sup>C NMR

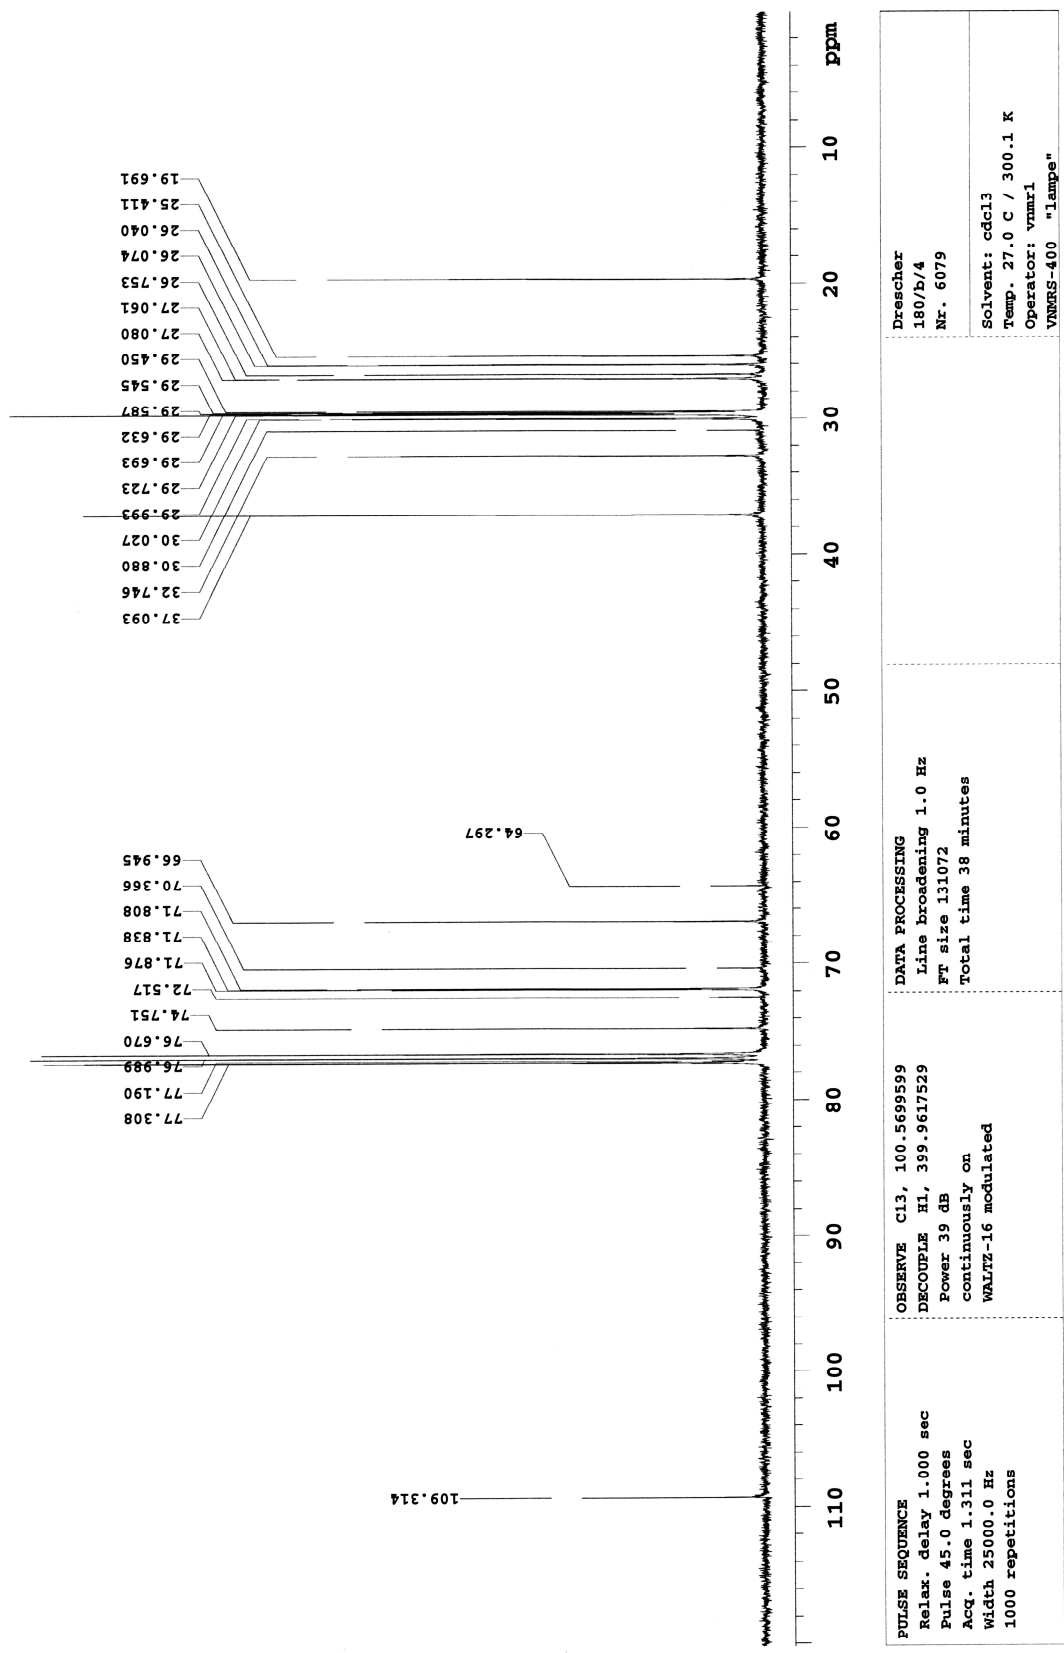

Compound **24a**: ESI-MS, positive mode

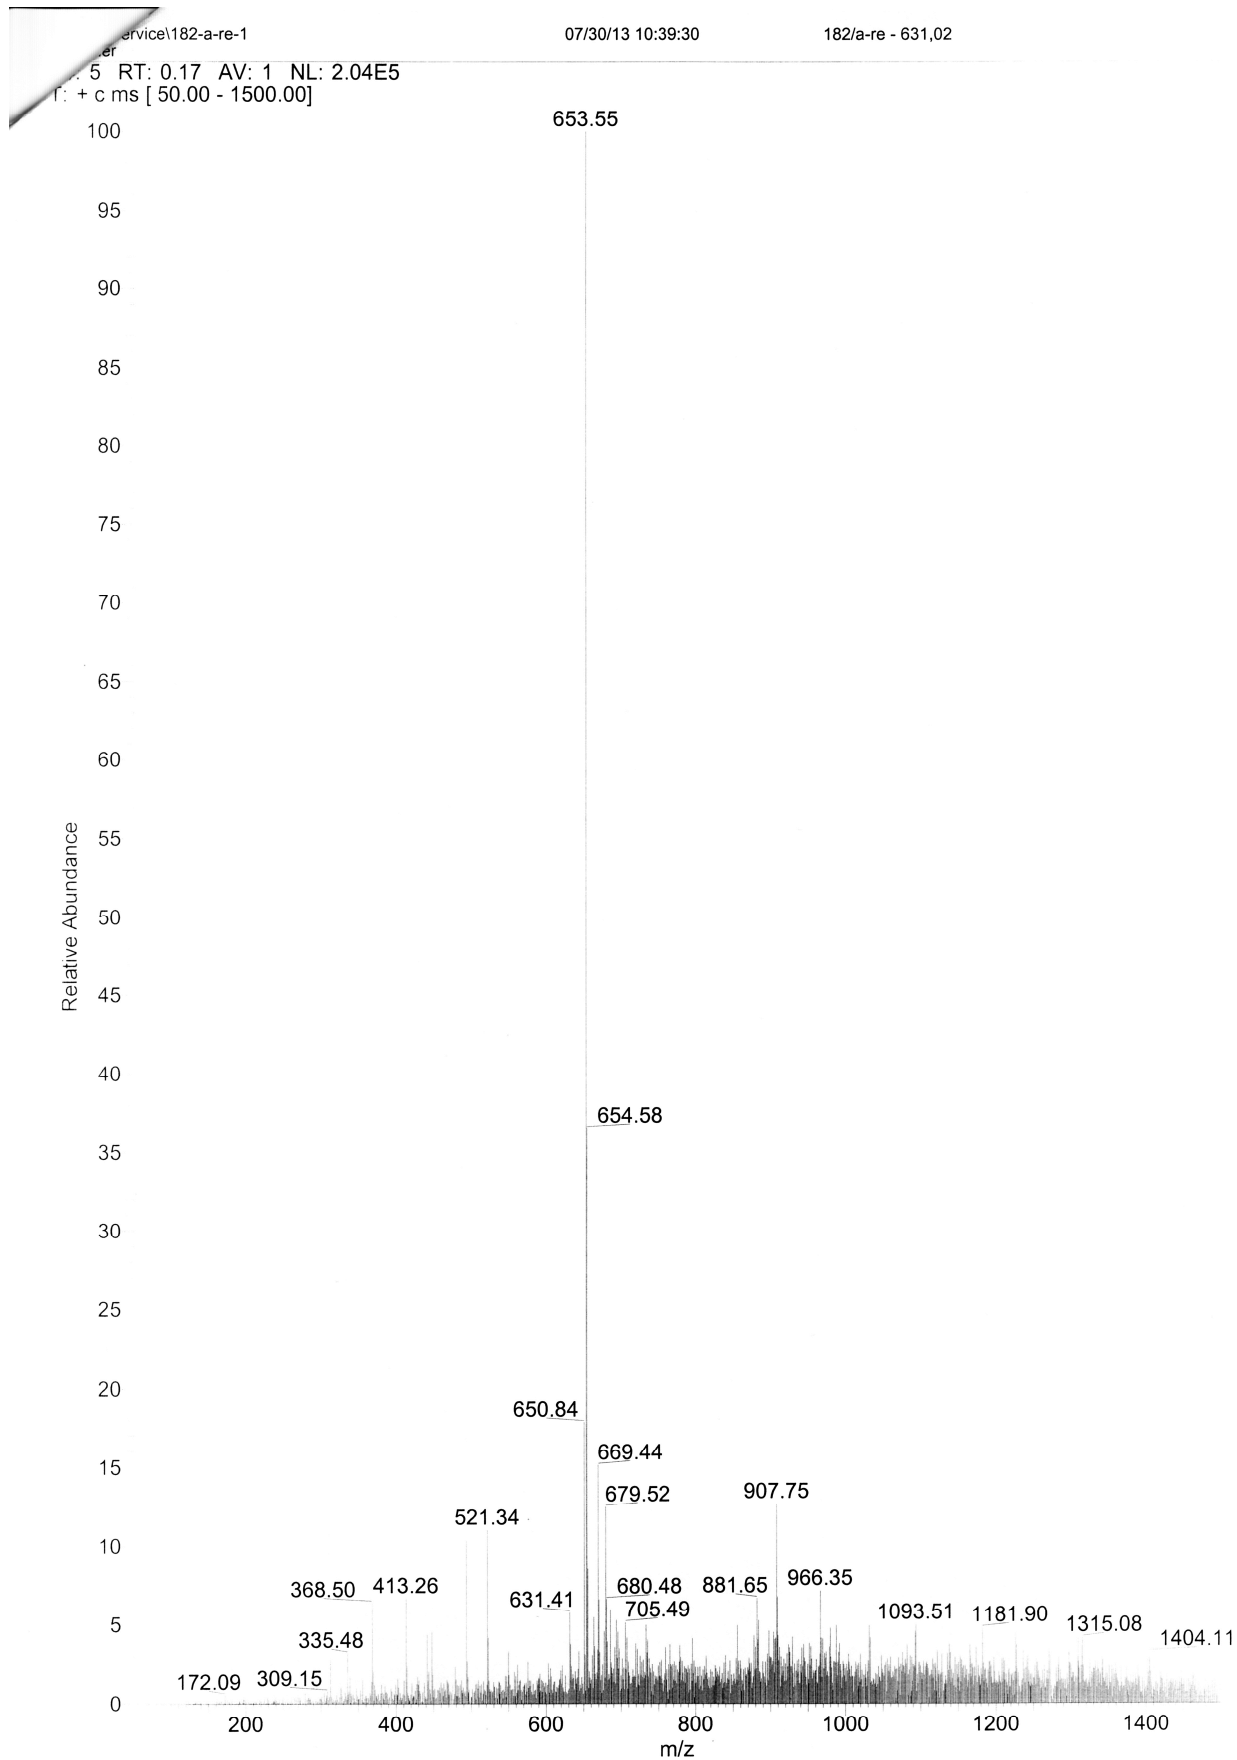

Compound 24a: <sup>1</sup>H NMR

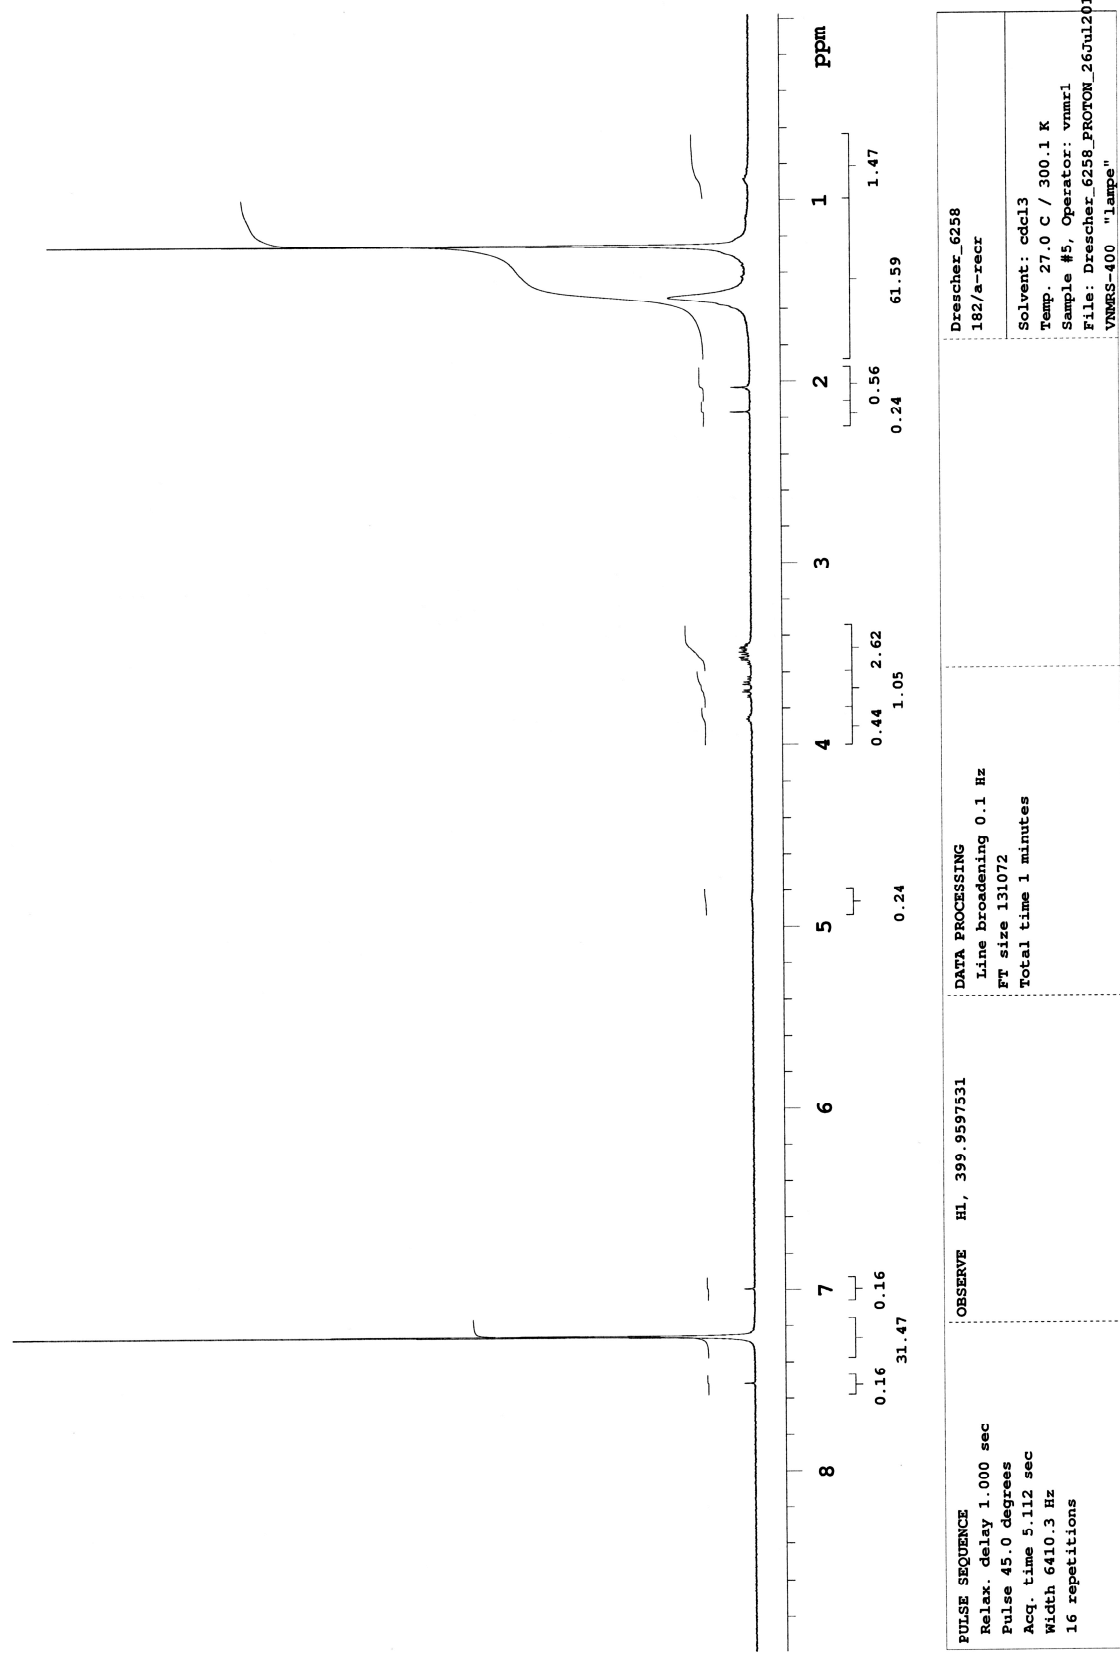

**Compound 24b: ESI-MS, positive mode**

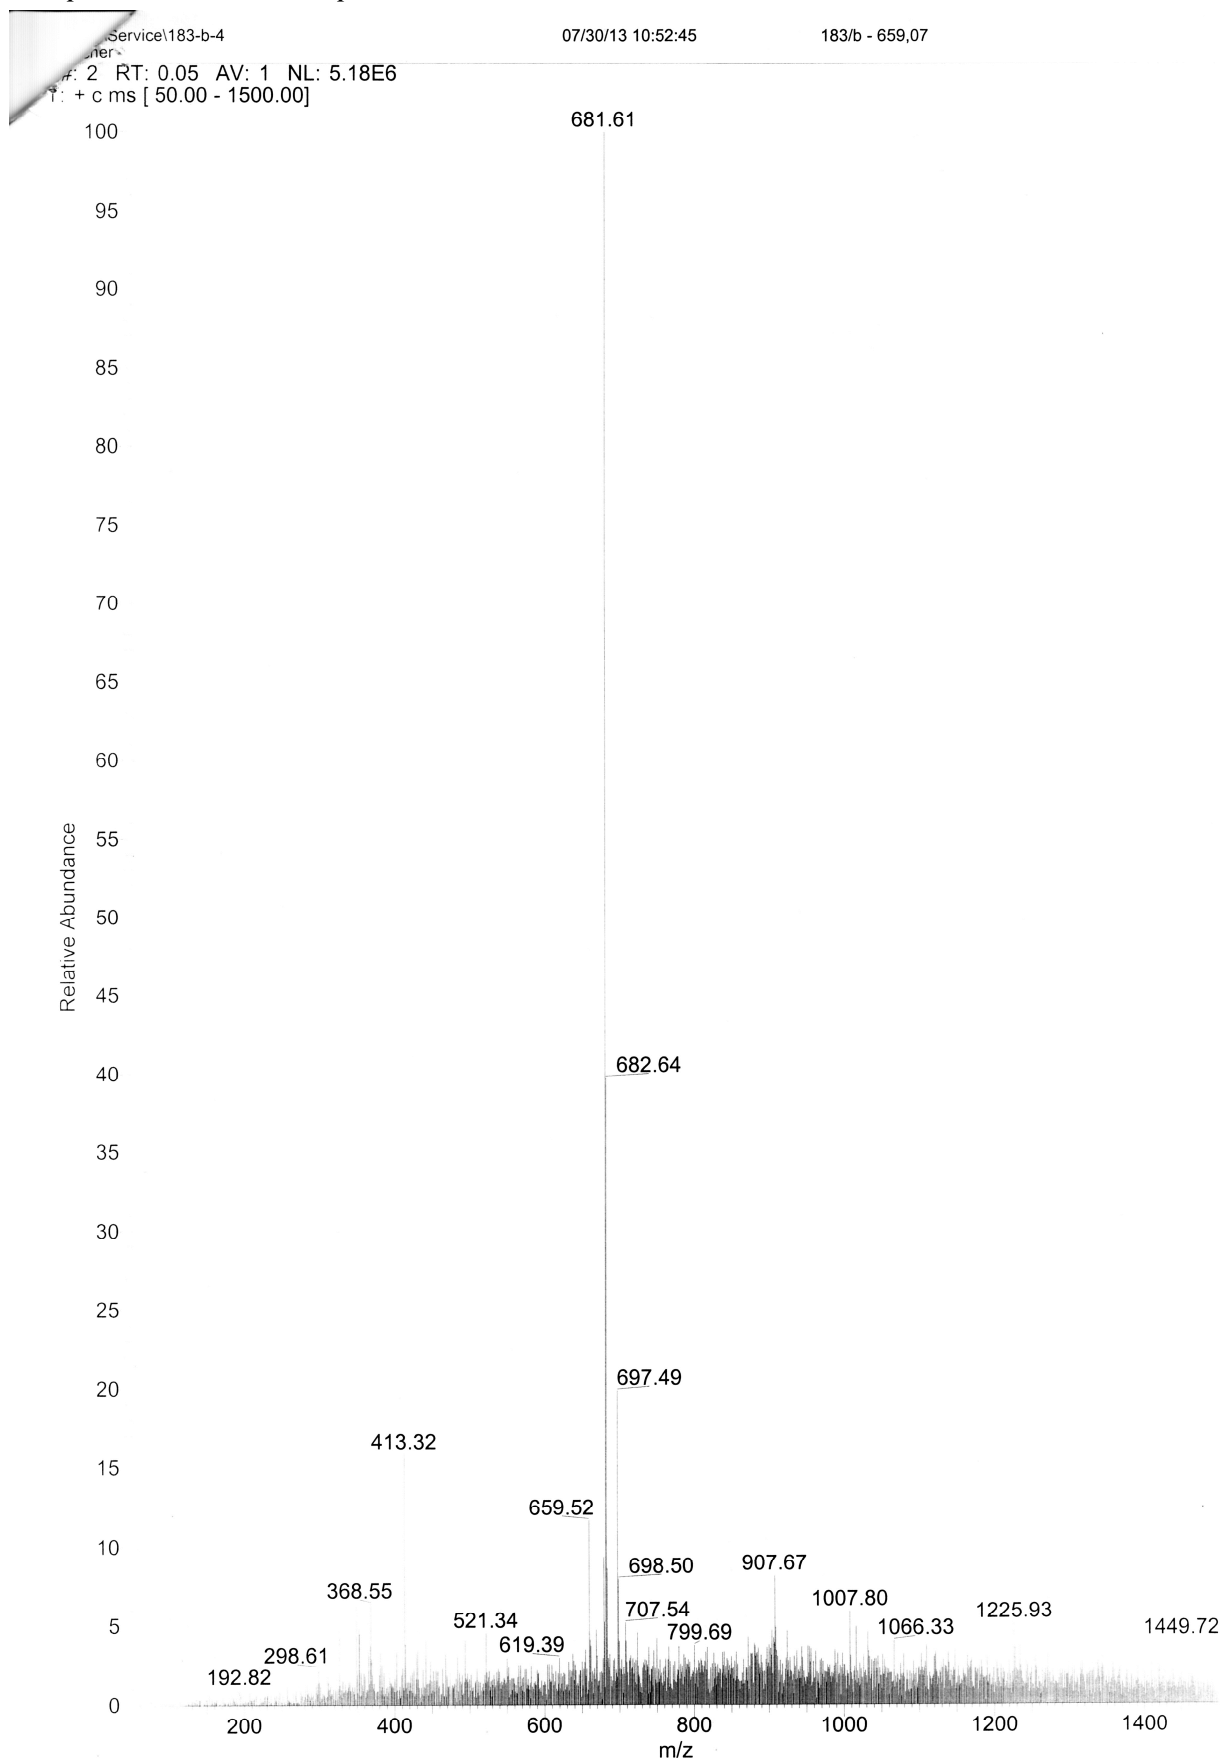

Compound **24b**: ESI-MS, negative mode

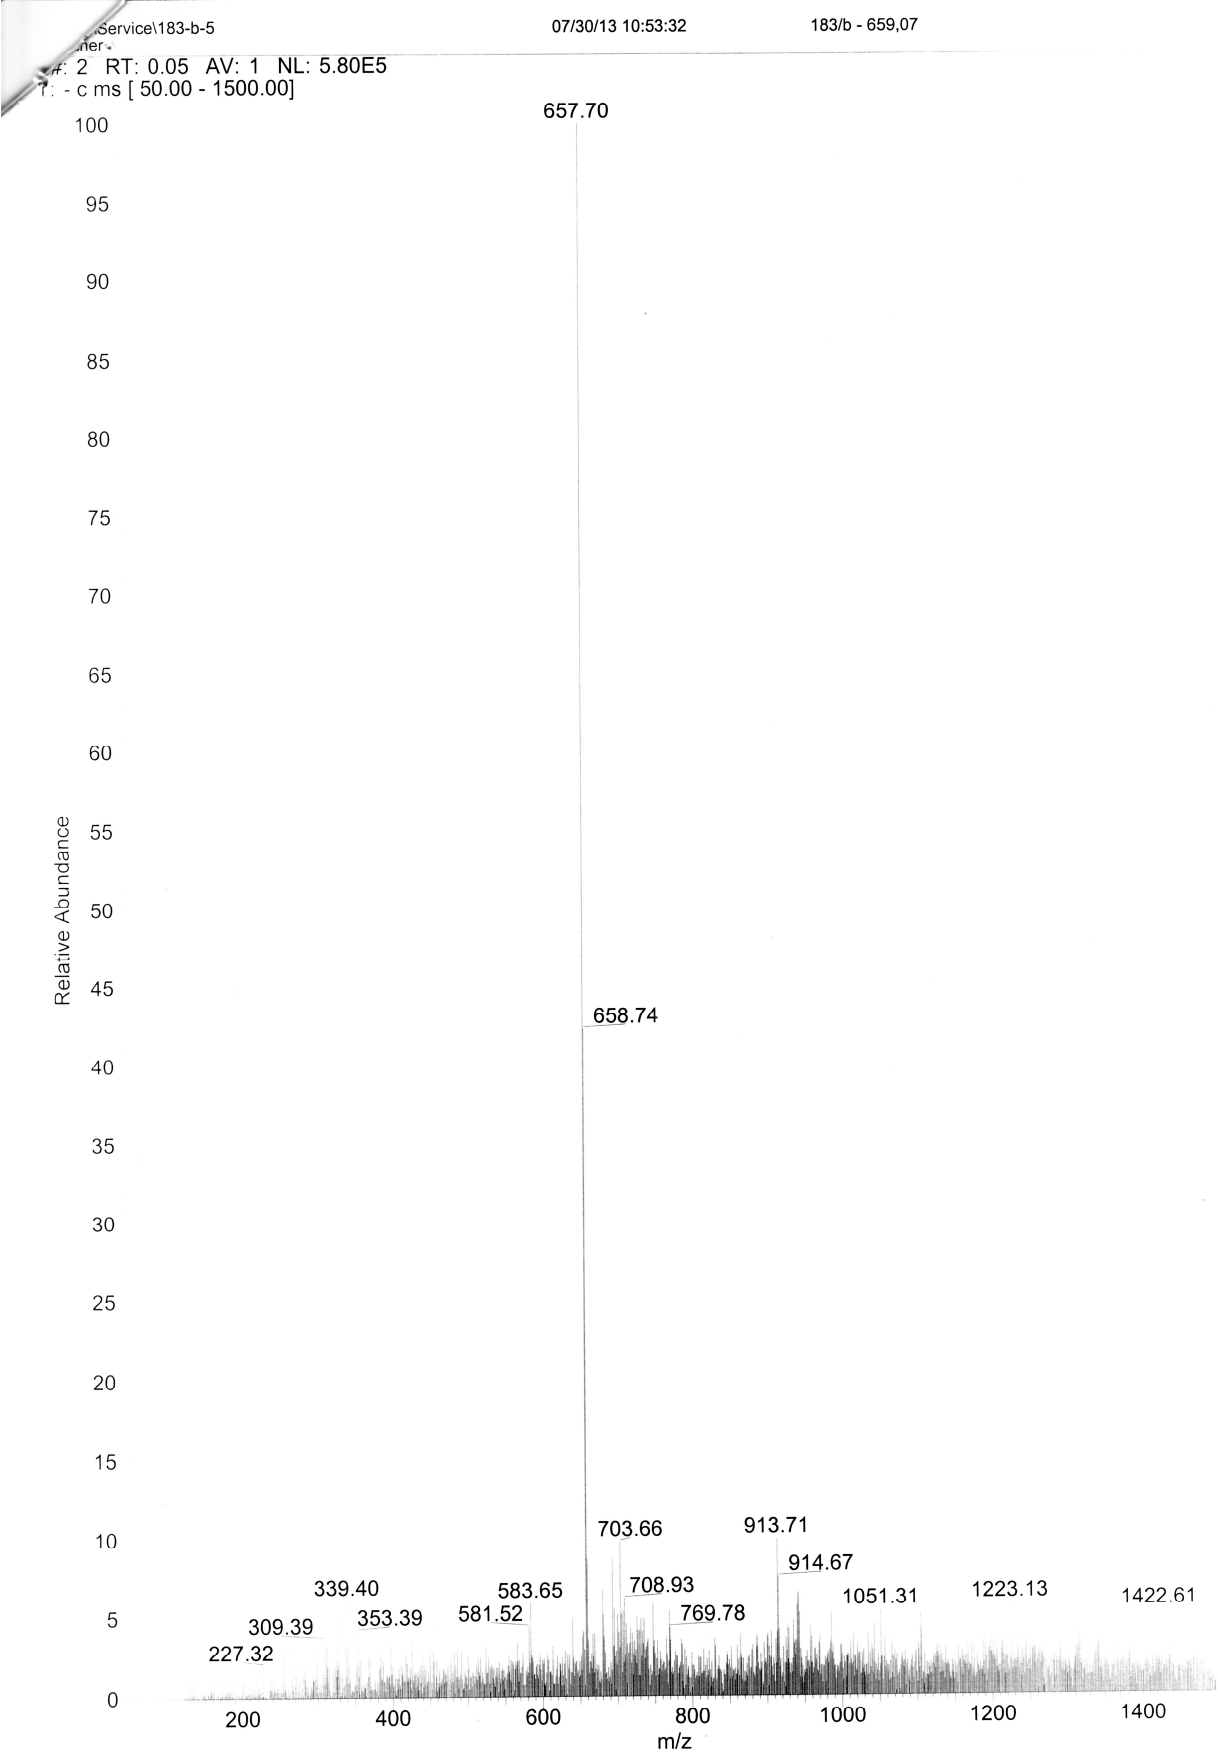



Compound 24b: <sup>1</sup>H NMR

Vorstufe  
Netzgeräts

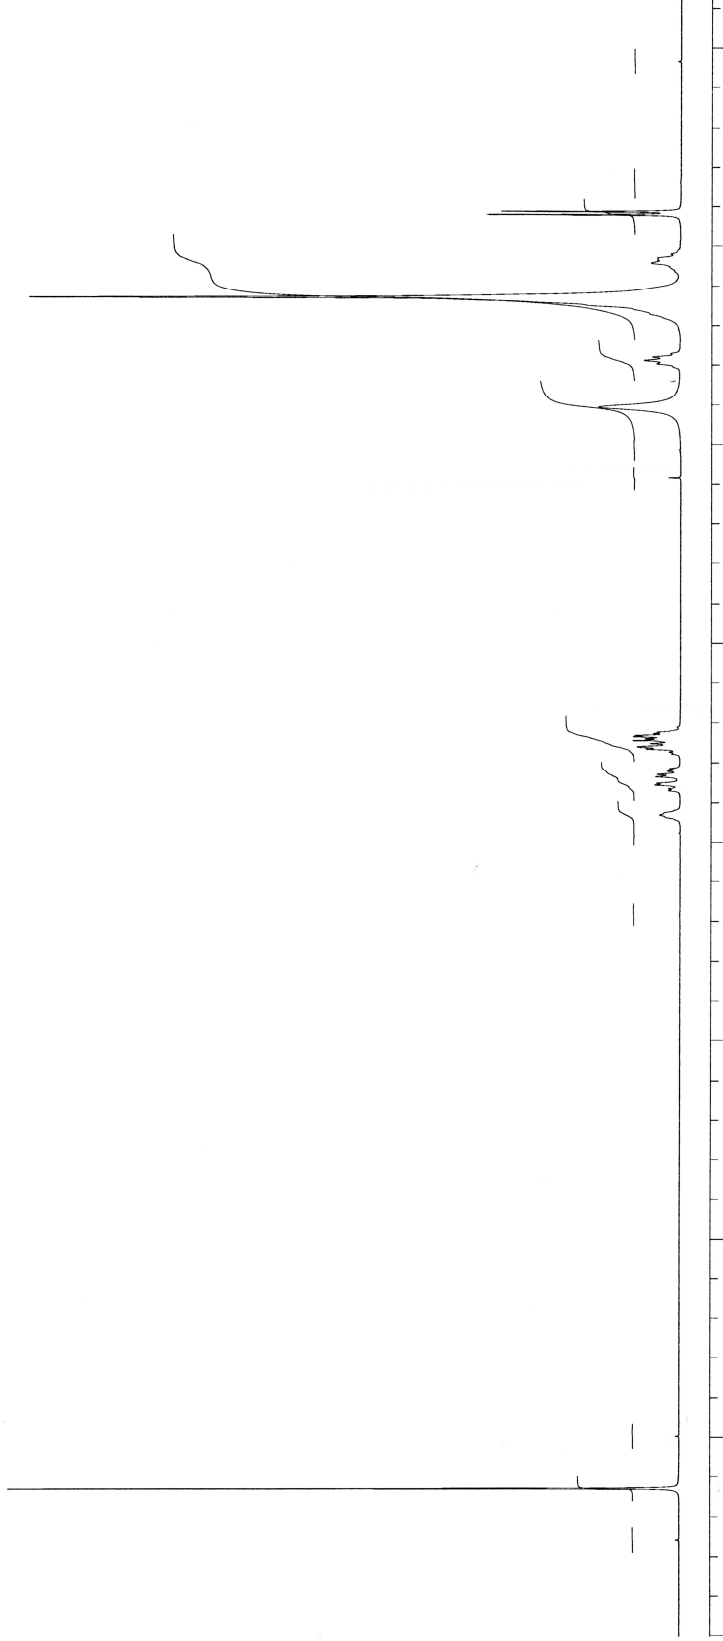

|                                                                                                                                   |                                |                                                                                            |                                                                                                                                                                             |
|-----------------------------------------------------------------------------------------------------------------------------------|--------------------------------|--------------------------------------------------------------------------------------------|-----------------------------------------------------------------------------------------------------------------------------------------------------------------------------|
| <b>PULSE SEQUENCE</b><br>Relax. delay 1.000 sec<br>Pulse 45.0 degrees<br>Acq. time 5.112 sec<br>Width 6410.3 Hz<br>16 repetitions | <b>OBSERVE</b> H1, 399.9597531 | <b>DATA PROCESSING</b><br>Line broadening 0.1 Hz<br>FT size 131072<br>Total time 1 minutes | <b>Drescher_6259</b><br>183/b<br><br>Solvent: cdcl3<br>Temp. 27.0 C / 300.1 K<br>Sample #6, Operator: vnmr1<br>File: Drescher_6259_PROTON_26Jul2013_01<br>VNMR5-400 "lampe" |
|-----------------------------------------------------------------------------------------------------------------------------------|--------------------------------|--------------------------------------------------------------------------------------------|-----------------------------------------------------------------------------------------------------------------------------------------------------------------------------|

Compound 25a: ESI-MS, positive mode

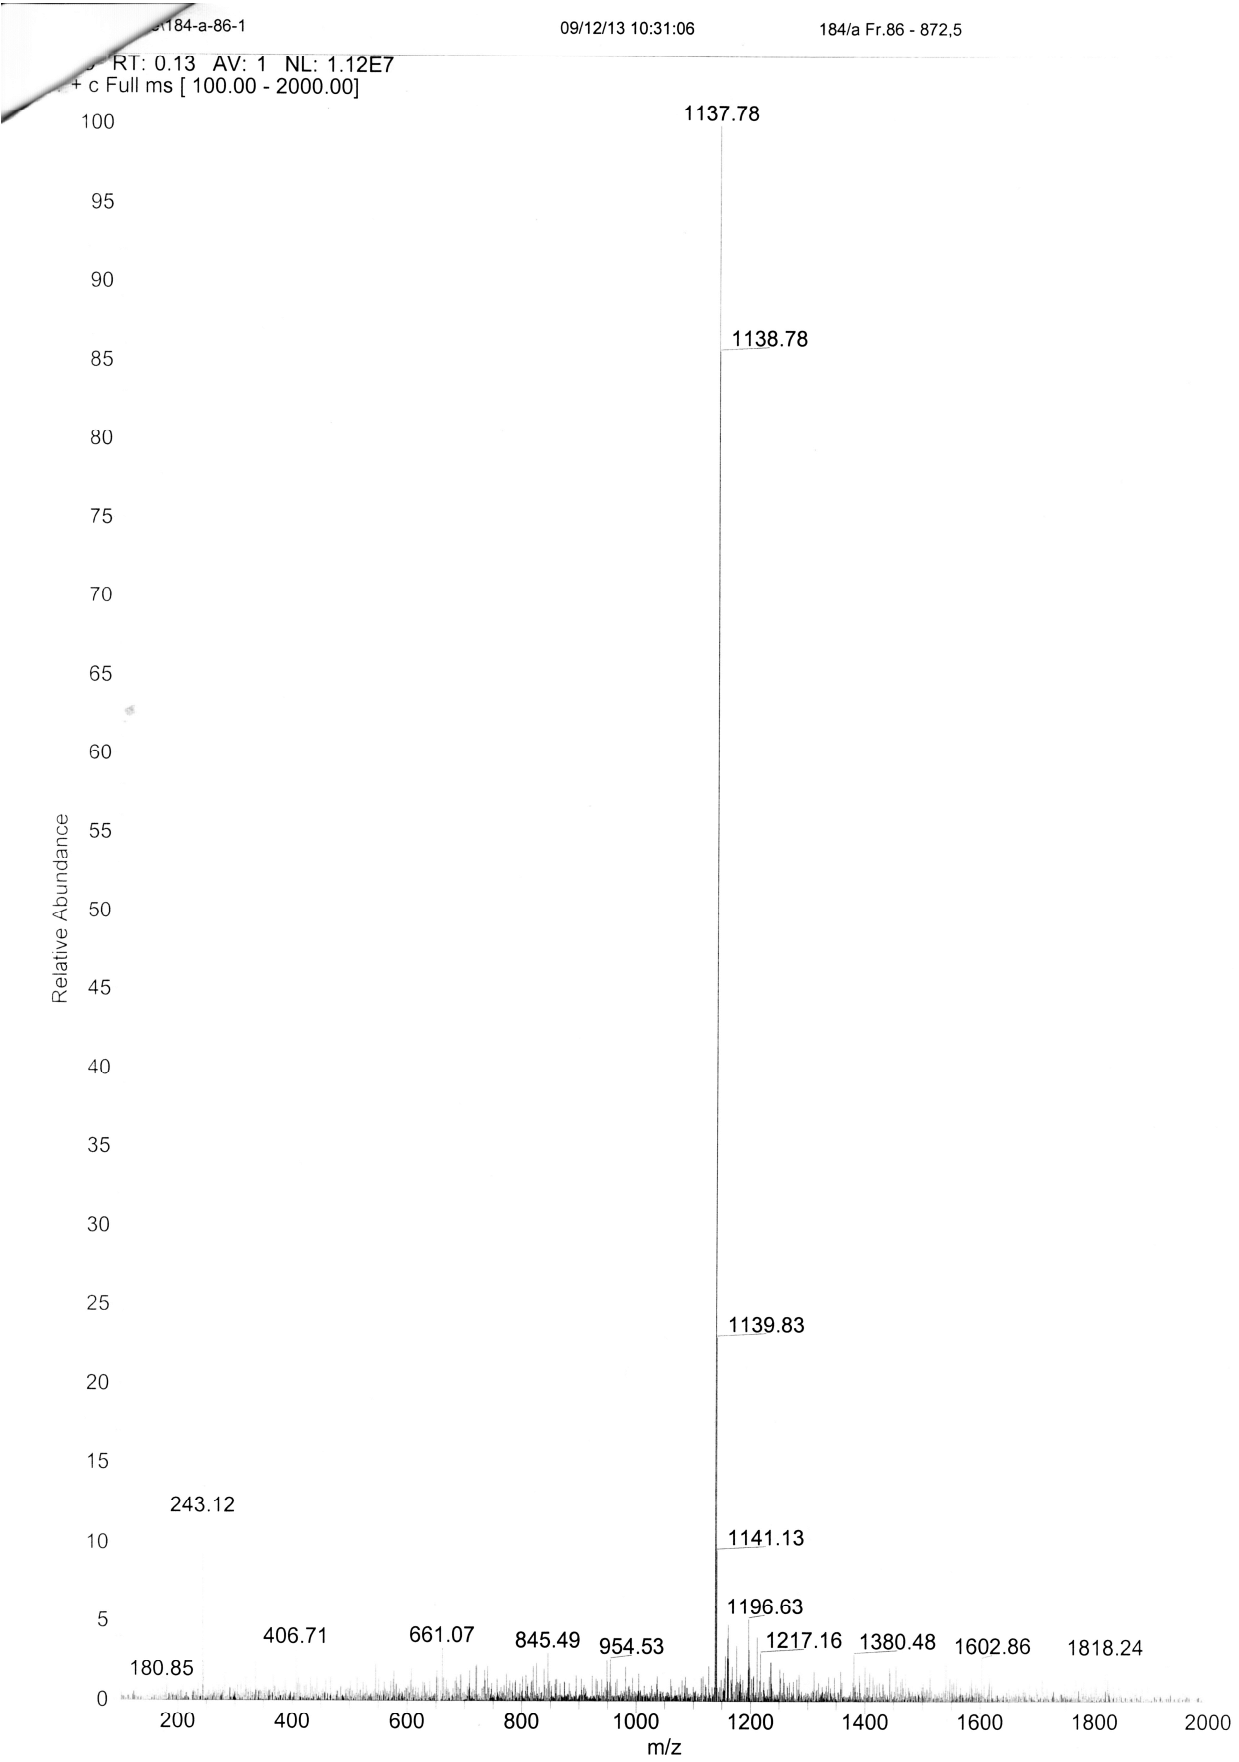

**Compound 25a: ESI-MS, negative mode**

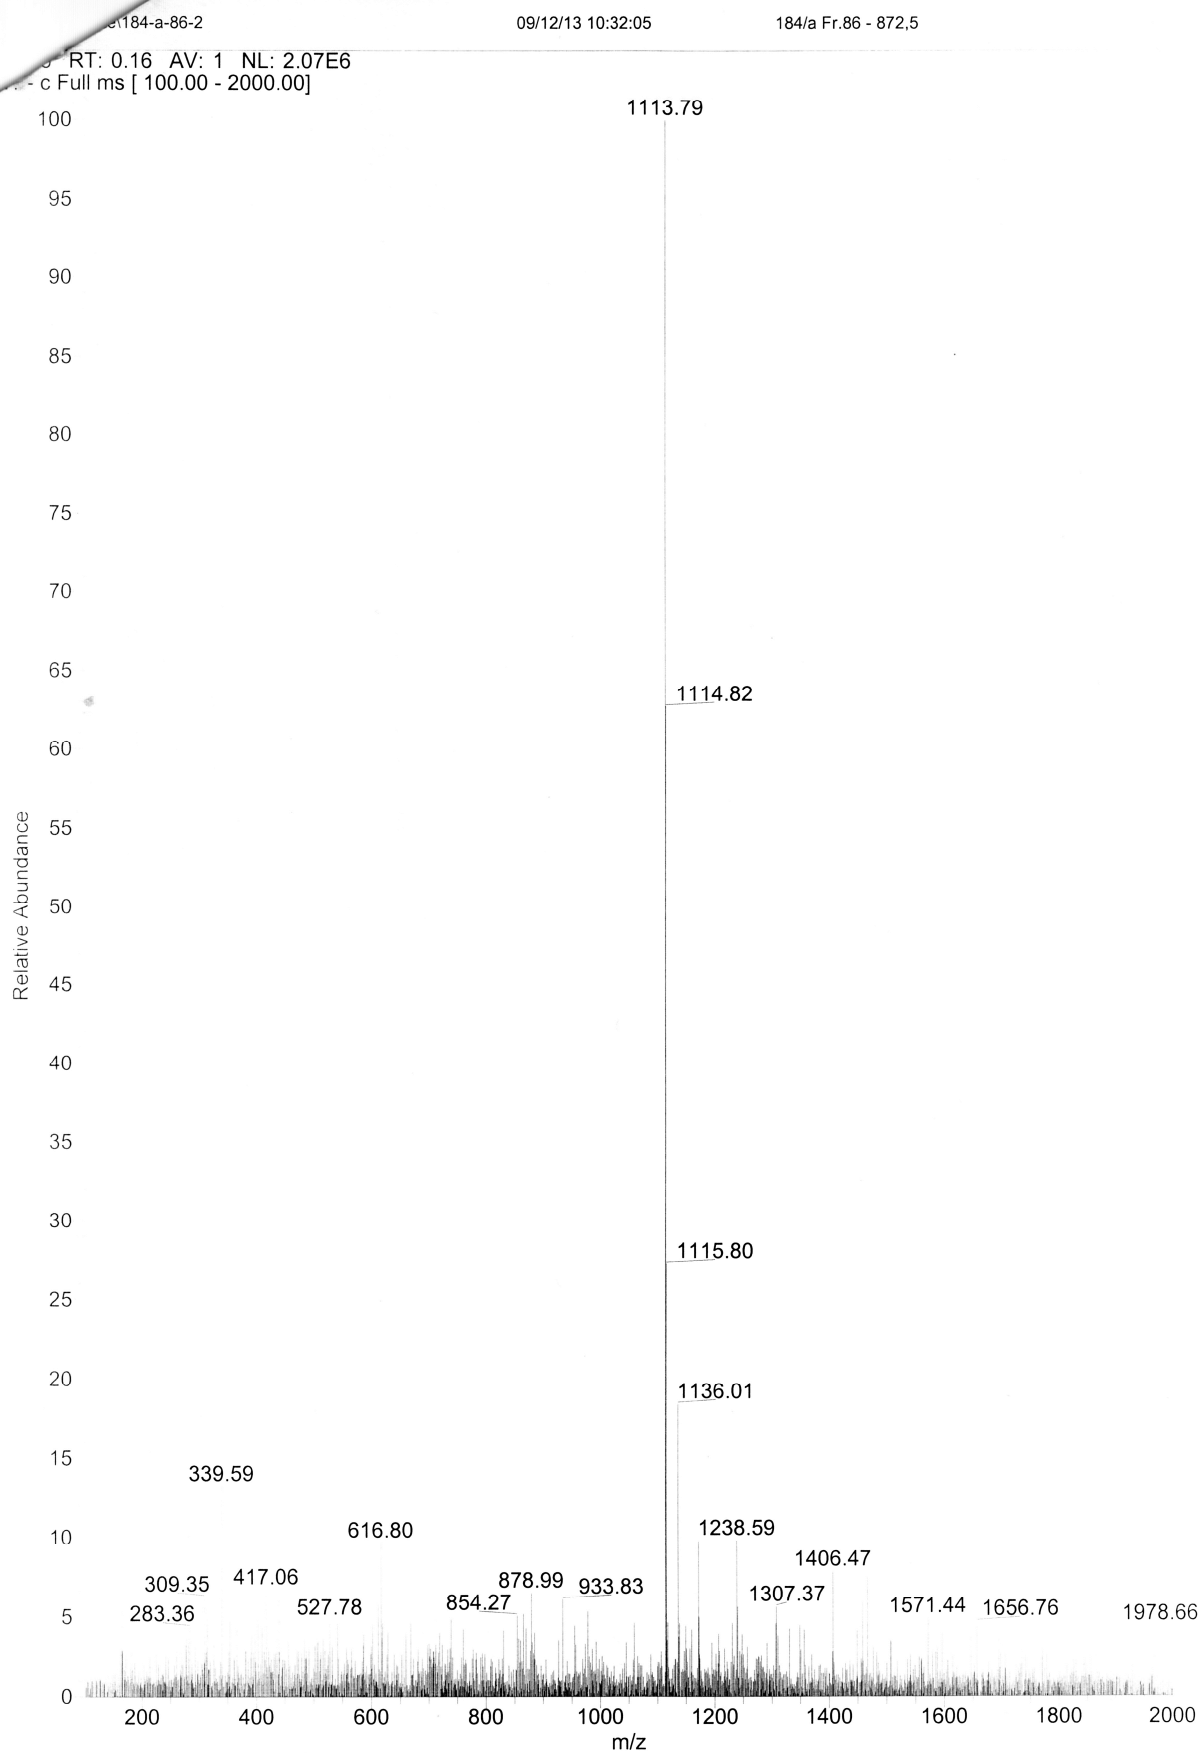

*Compound 25a: <sup>1</sup>H NMR*

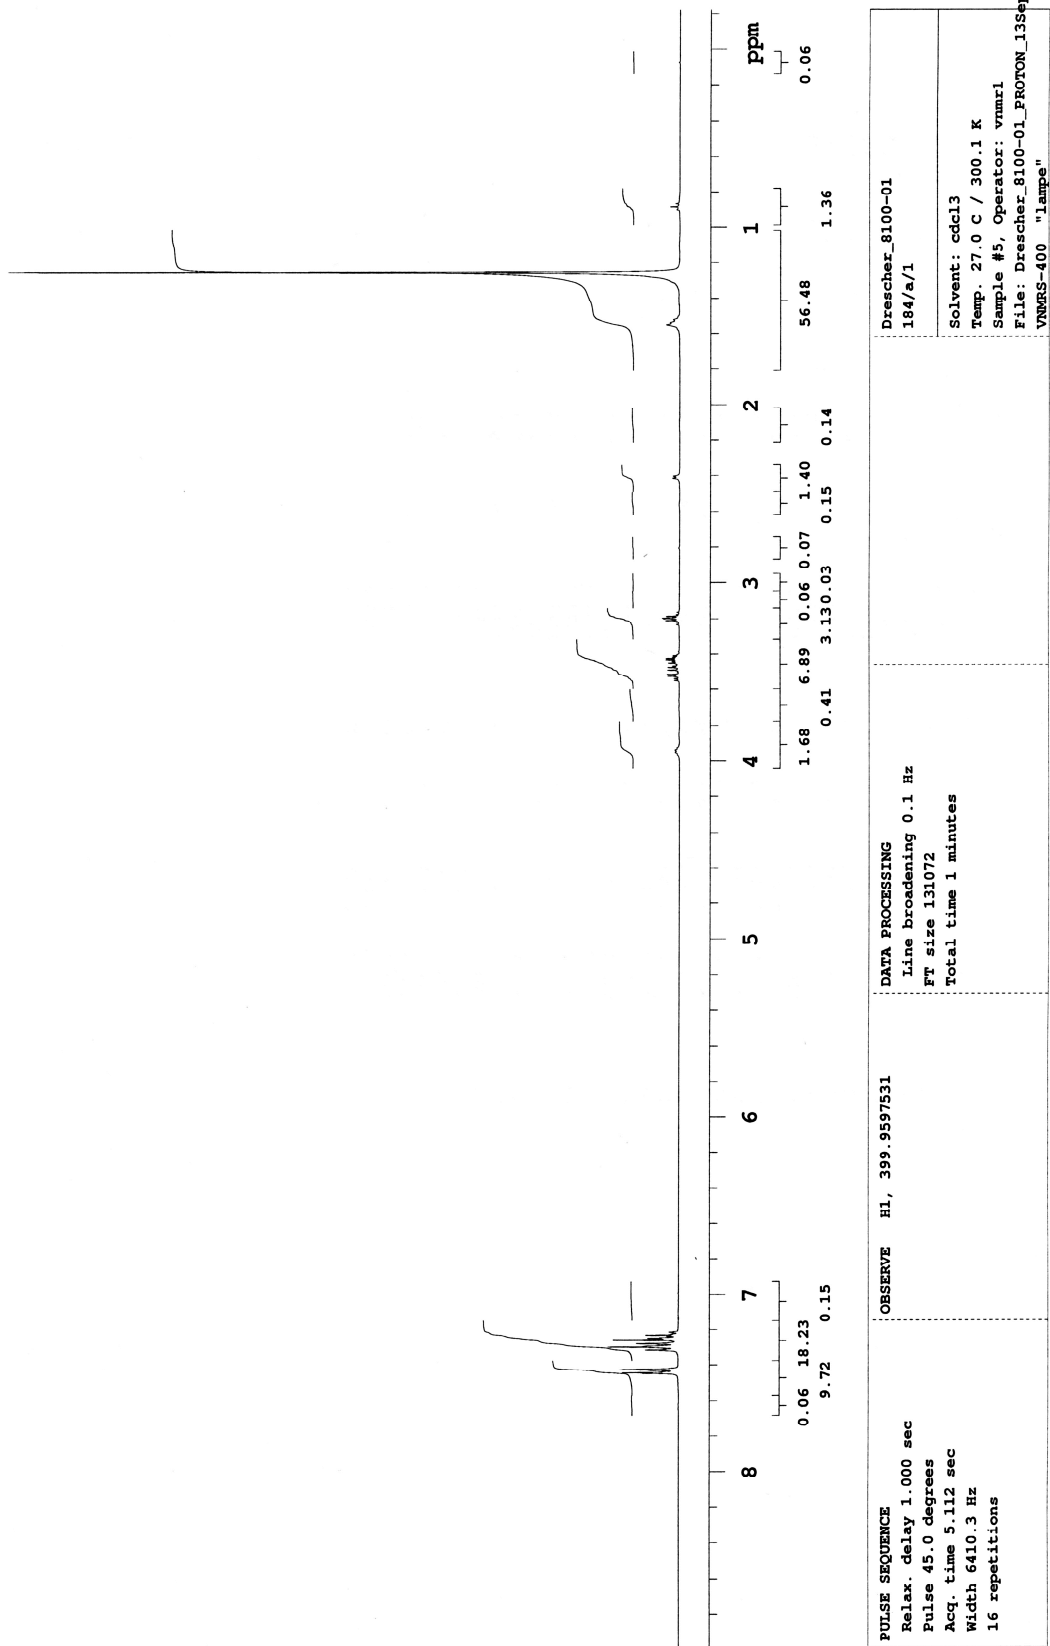

Compound 25a:  $^{13}\text{C}$  NMR

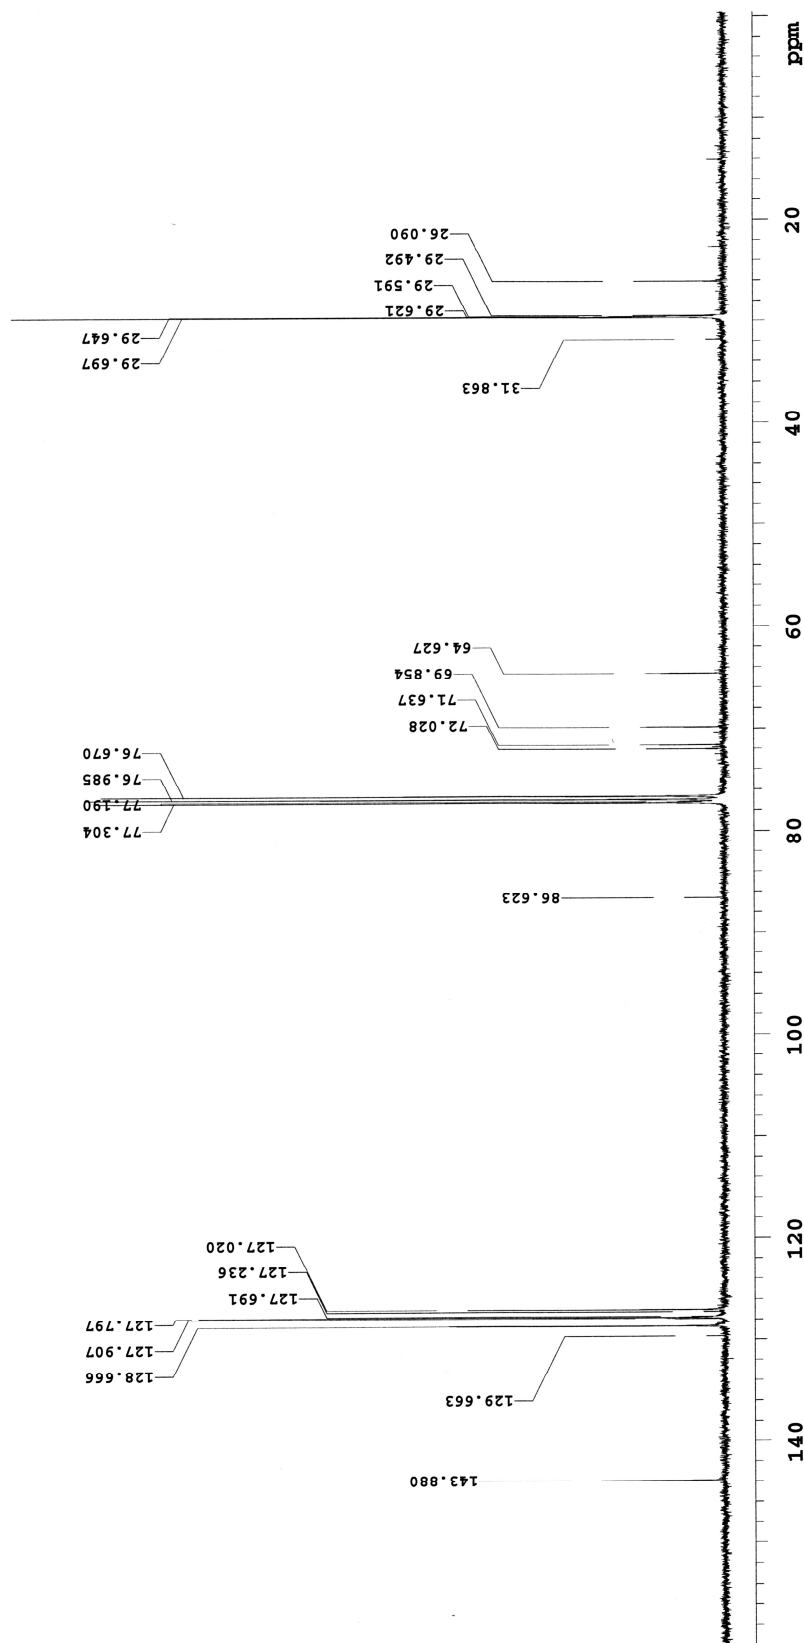

|                                                                                                                                                       |                                                                                                                             |                                                                                                   |                                                                                                                                                                                          |
|-------------------------------------------------------------------------------------------------------------------------------------------------------|-----------------------------------------------------------------------------------------------------------------------------|---------------------------------------------------------------------------------------------------|------------------------------------------------------------------------------------------------------------------------------------------------------------------------------------------|
| <p><b>PULSE SEQUENCE</b><br/> Relax. delay 1.000 sec<br/> Pulse 45.0 degrees<br/> Acq. time 1.311 sec<br/> Width 25000.0 Hz<br/> 1000 repetitions</p> | <p>OBSERVE C13, 100.5699599<br/> DECOUPLE H1, 399.9617529<br/> Power 39 dB<br/> continuously on<br/> WALTZ-16 modulated</p> | <p>DATA PROCESSING<br/> Line broadening 1.0 Hz<br/> Ft size 131072<br/> Total time 38 minutes</p> | <p>Drescher_8100-01<br/> 184/a/1<br/> Solvent: cdcl3<br/> Temp. 27.0 C / 300.1 K<br/> Sample #5, Operator: vnmr1<br/> File: Drescher_8100-01_CARBON_13Sep2013<br/> VNMR5-400 "lampe"</p> |
|-------------------------------------------------------------------------------------------------------------------------------------------------------|-----------------------------------------------------------------------------------------------------------------------------|---------------------------------------------------------------------------------------------------|------------------------------------------------------------------------------------------------------------------------------------------------------------------------------------------|

Compound **25b**: ESI-MS, positive mode

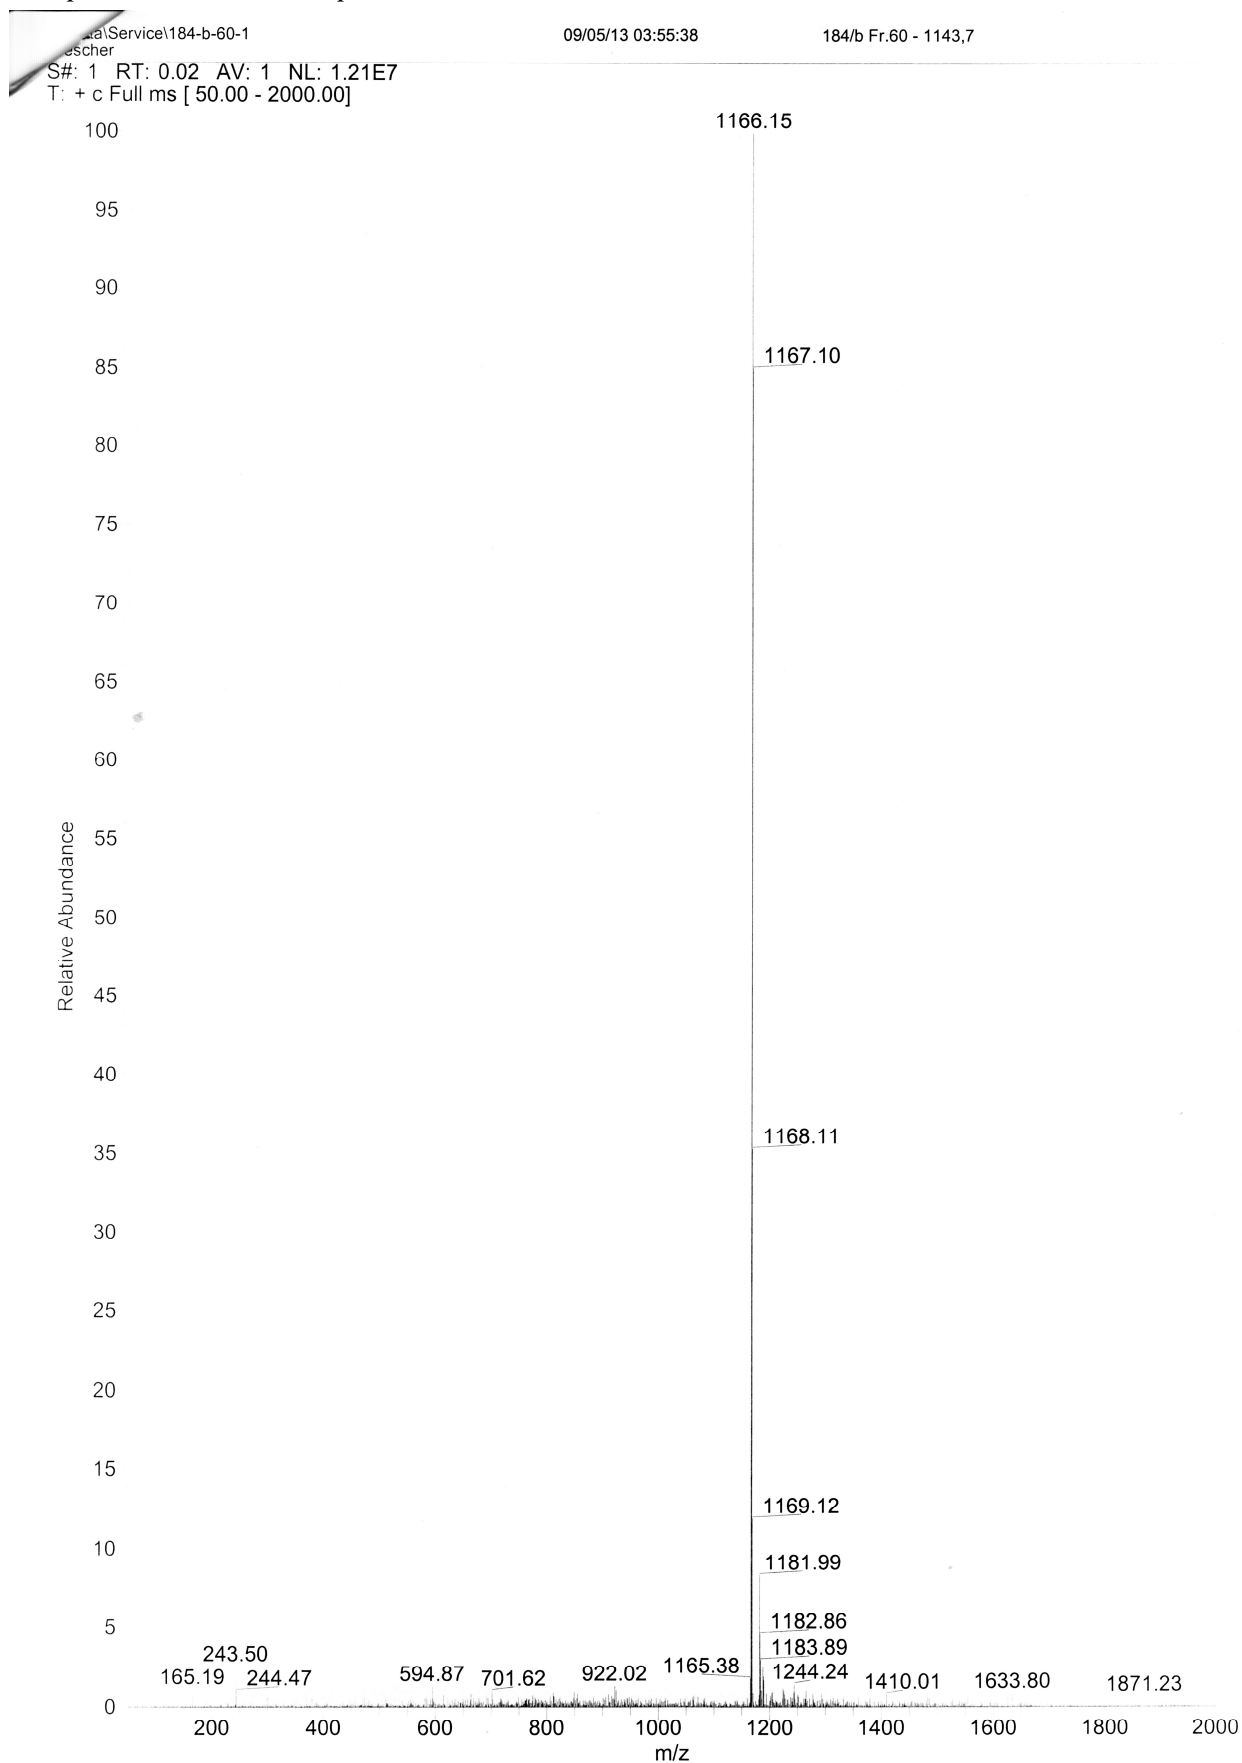

Compound **25b**: ESI-MS, negative mode

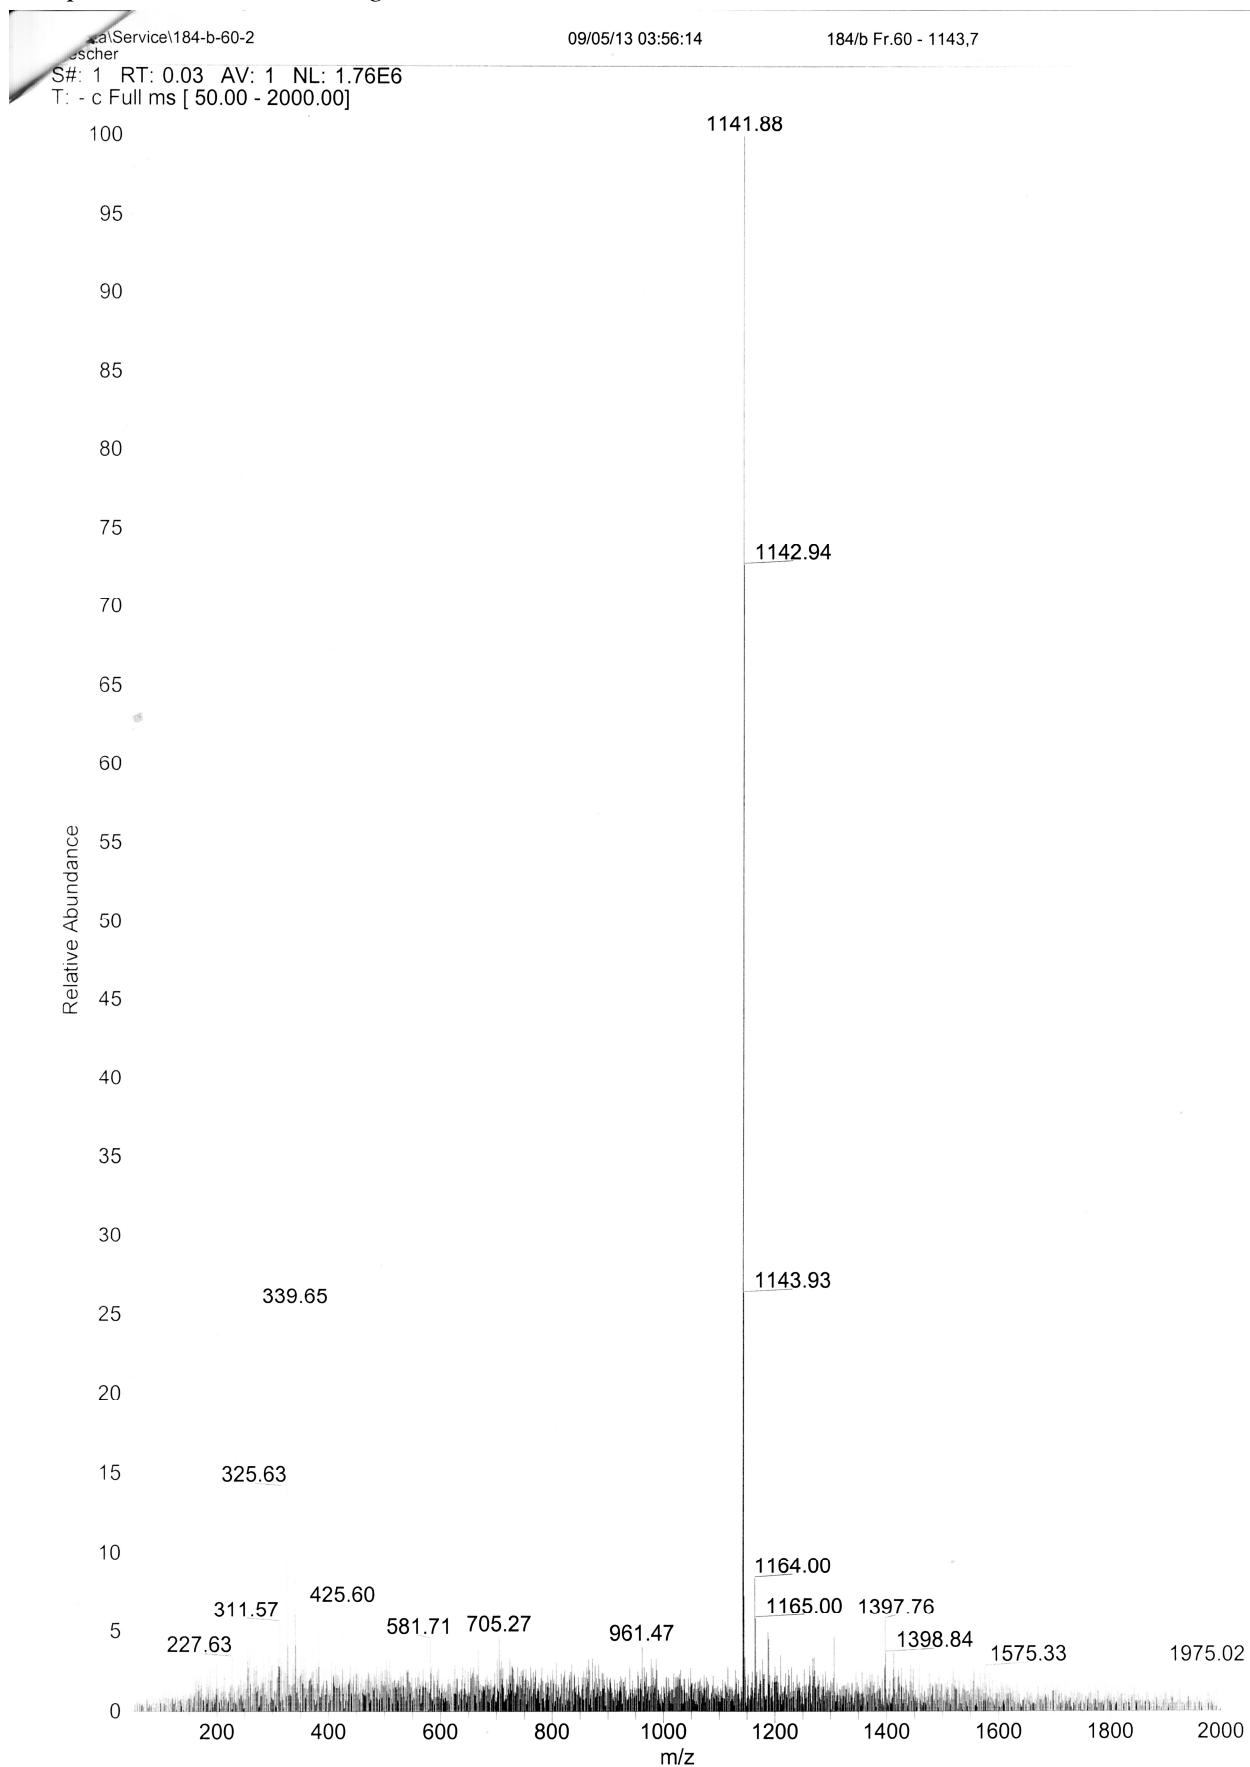

Compound 25b: <sup>1</sup>H NMR

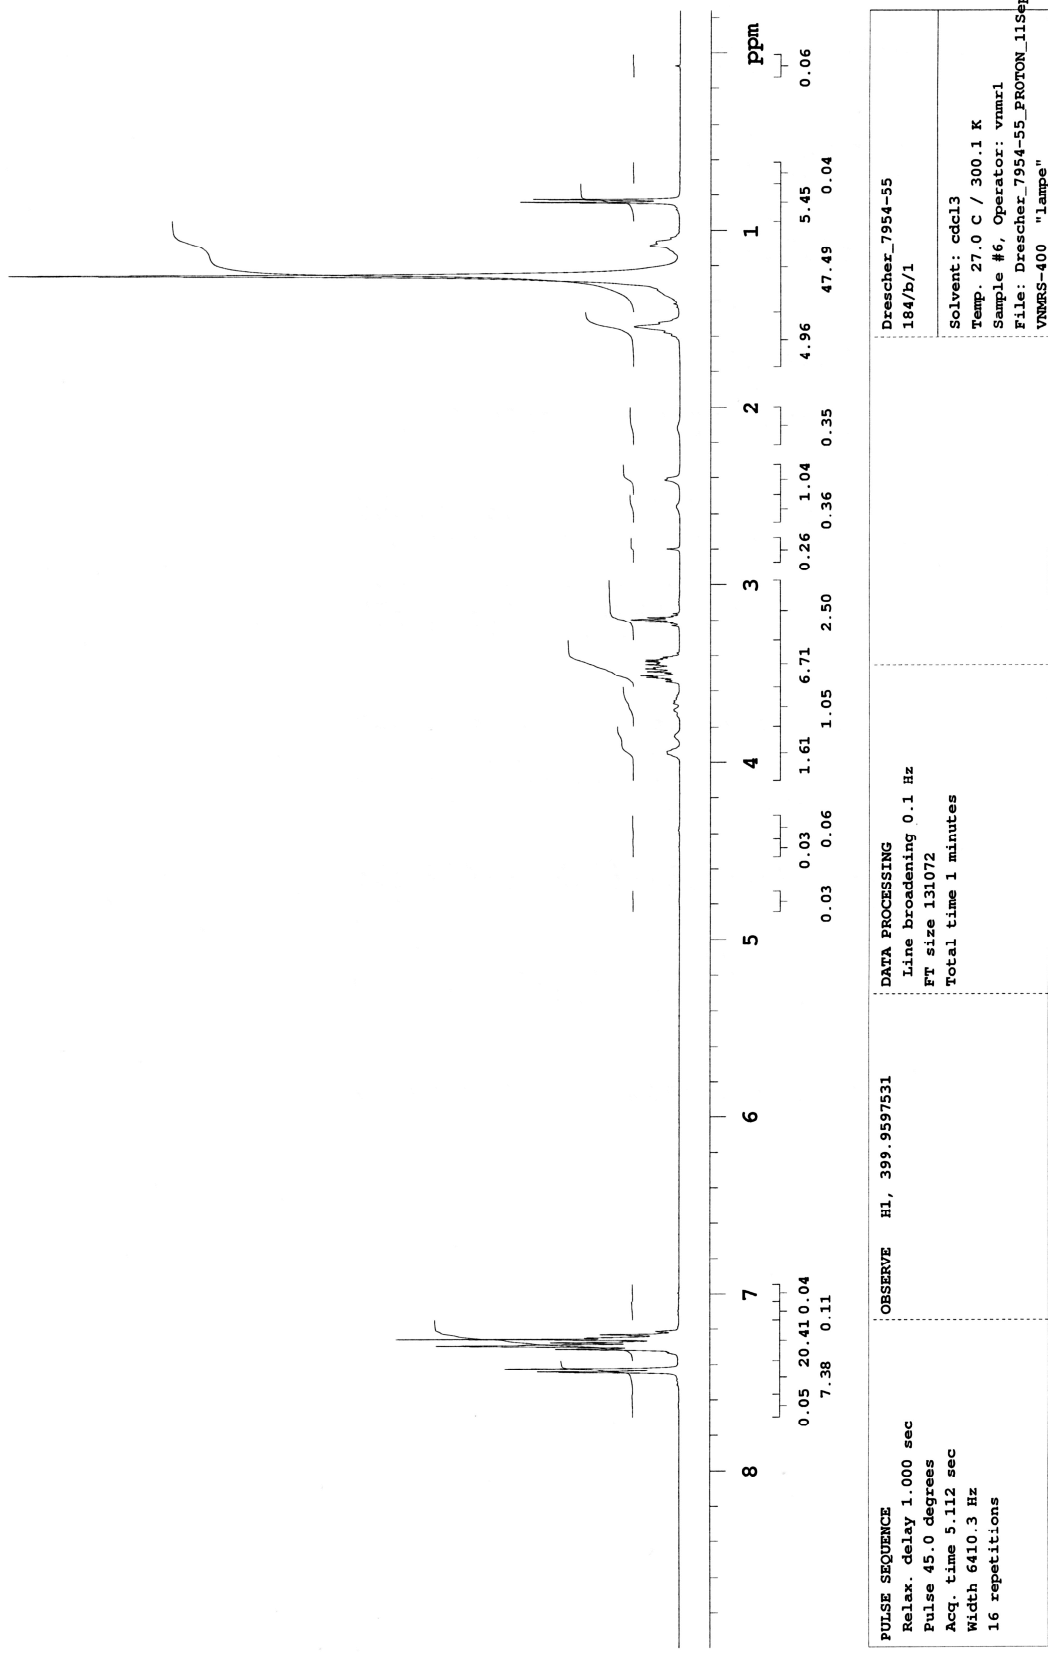



Compound 25b: <sup>13</sup>C NMR

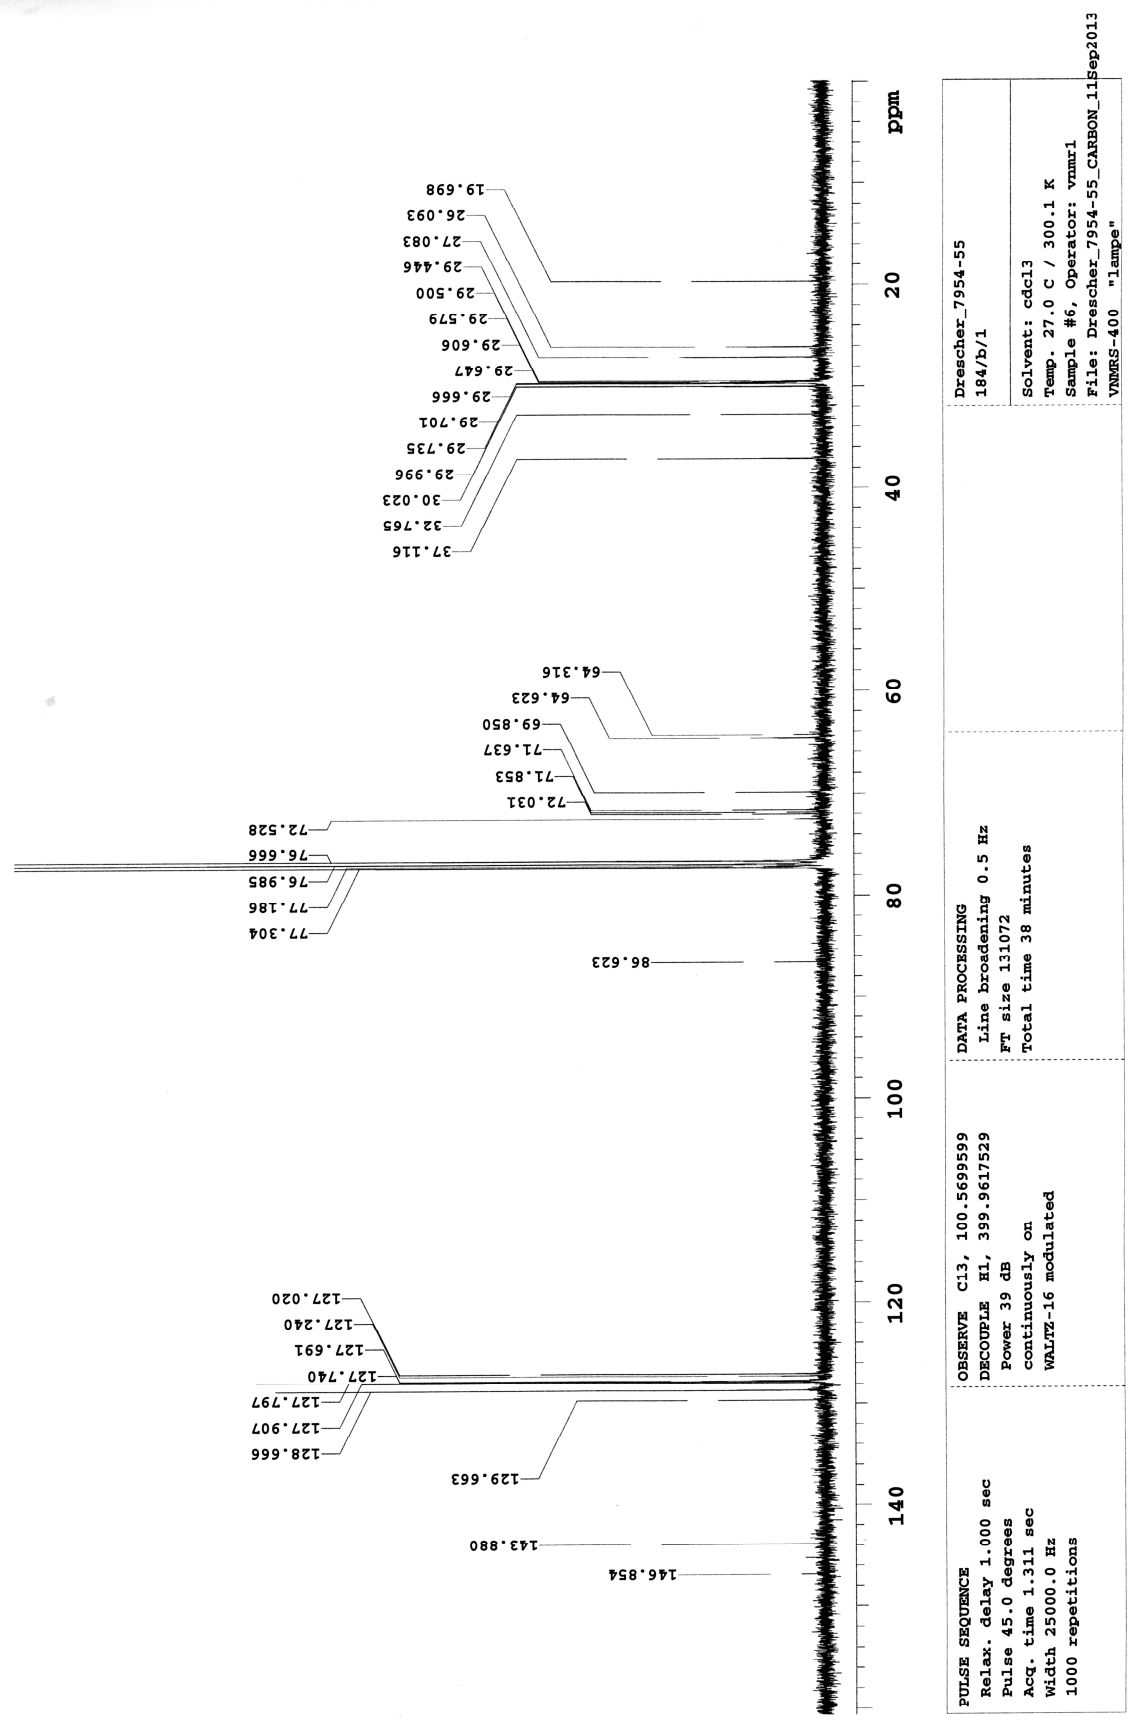

Compound **26a**: ESI-MS, positive mode

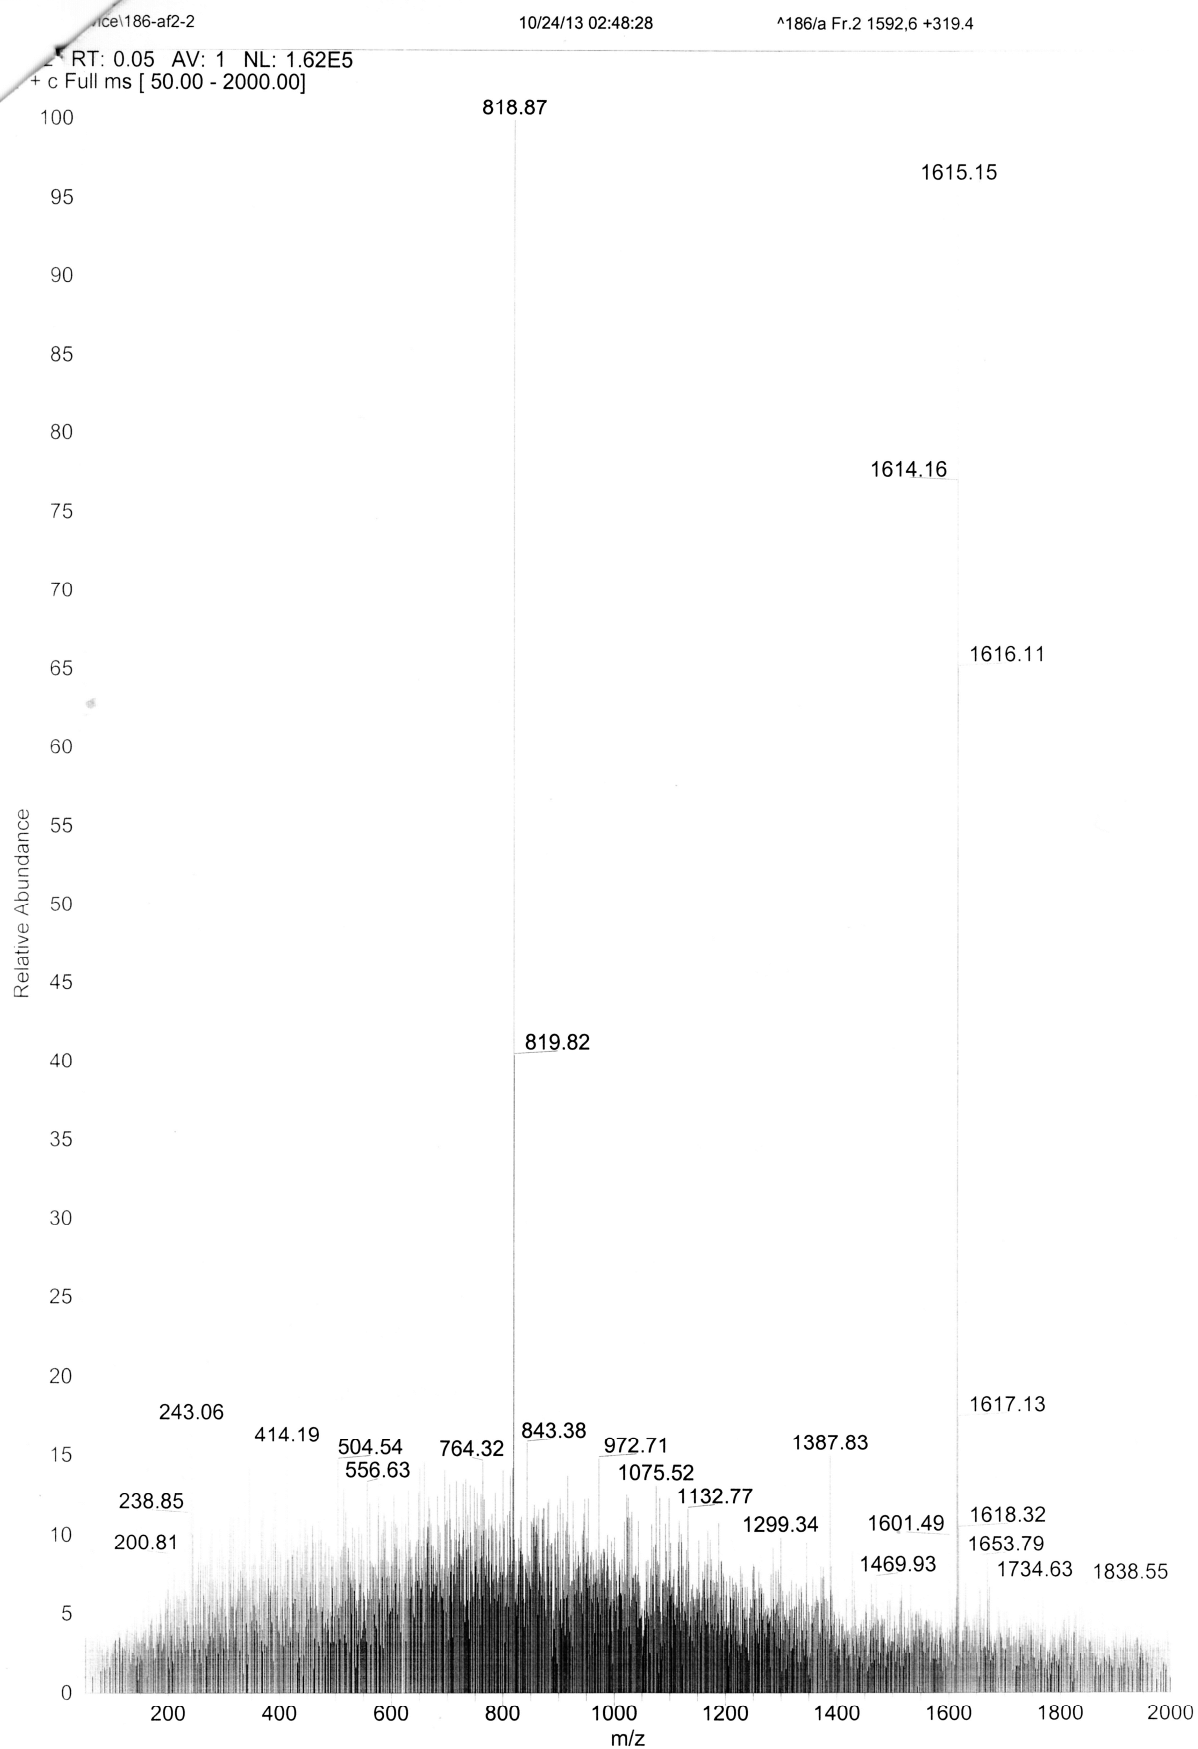

Compound 26a: <sup>1</sup>H NMR

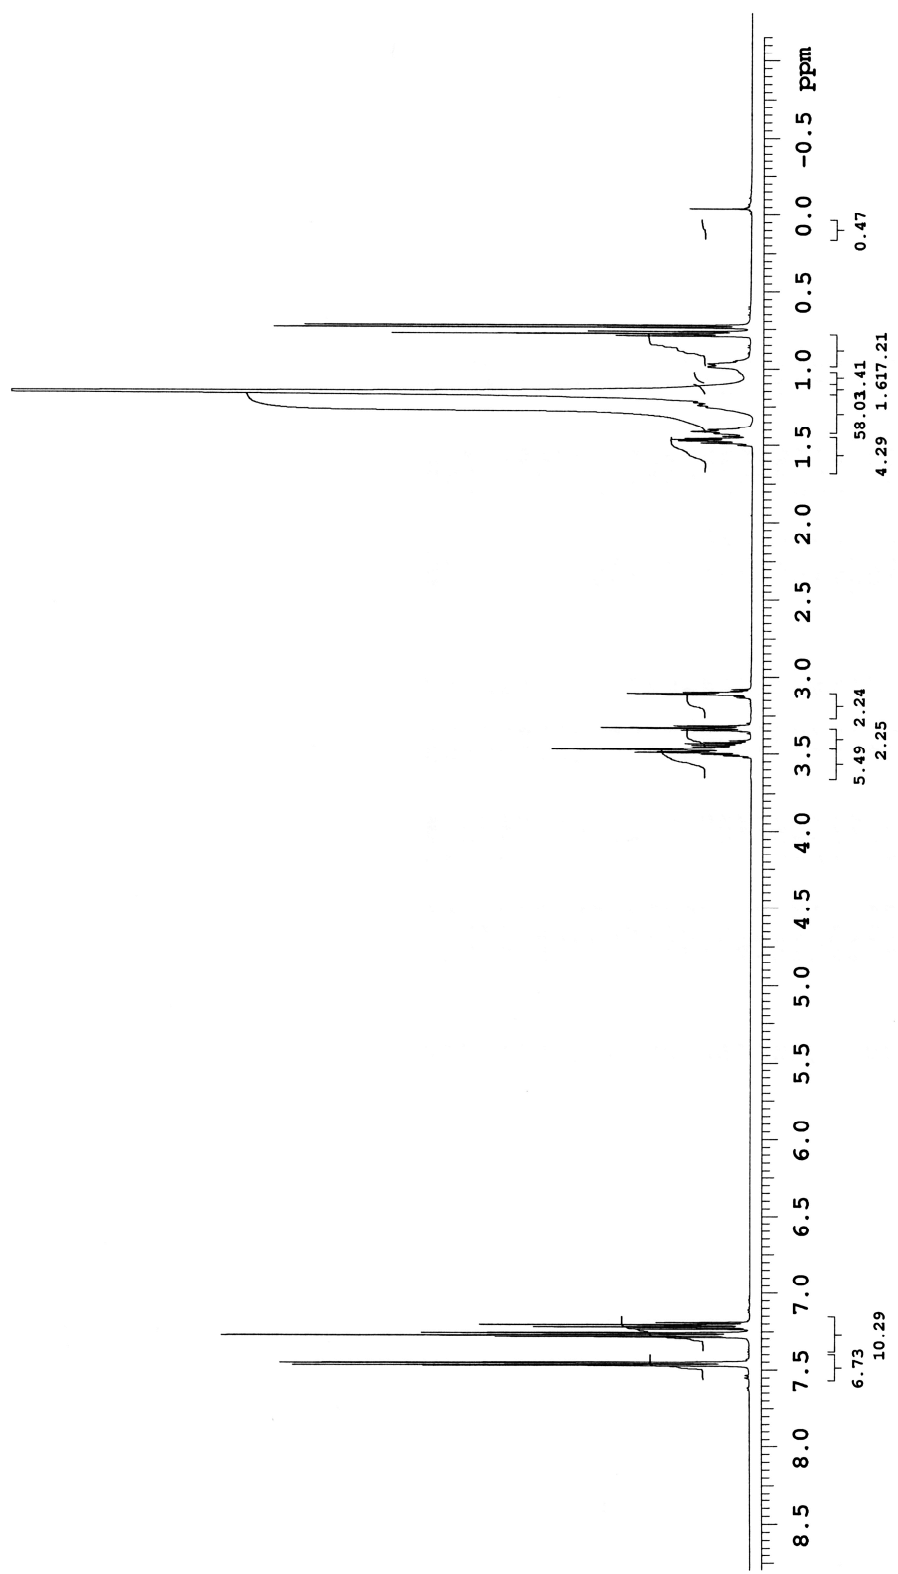

|                                                                                                                                   |                                |                                                                  |                                                                                                                         |
|-----------------------------------------------------------------------------------------------------------------------------------|--------------------------------|------------------------------------------------------------------|-------------------------------------------------------------------------------------------------------------------------|
| <b>PULSE SEQUENCE</b><br>Relax. delay 1.000 sec<br>Pulse 45.0 degrees<br>Acq. time 4.089 sec<br>Width 8012.8 Hz<br>32 repetitions | <b>OBSERVE</b> H1, 499.7466064 | <b>DATA PROCESSING</b><br>Ft size 131072<br>Total time 2 minutes | 2013-10-25<br>Drescher_5376-77<br>186/a/1<br><br>Solvent: cdcl3<br>Temp. 27.0 C / 300.1 K<br>Sample #6, Operator: vnmr1 |
|-----------------------------------------------------------------------------------------------------------------------------------|--------------------------------|------------------------------------------------------------------|-------------------------------------------------------------------------------------------------------------------------|

File: Drescher\_5376-77\_2013-10-25\_01/Drescher\_5376-77\_PROTON\_01

Compound 26a: <sup>13</sup>C NMR, APT mode

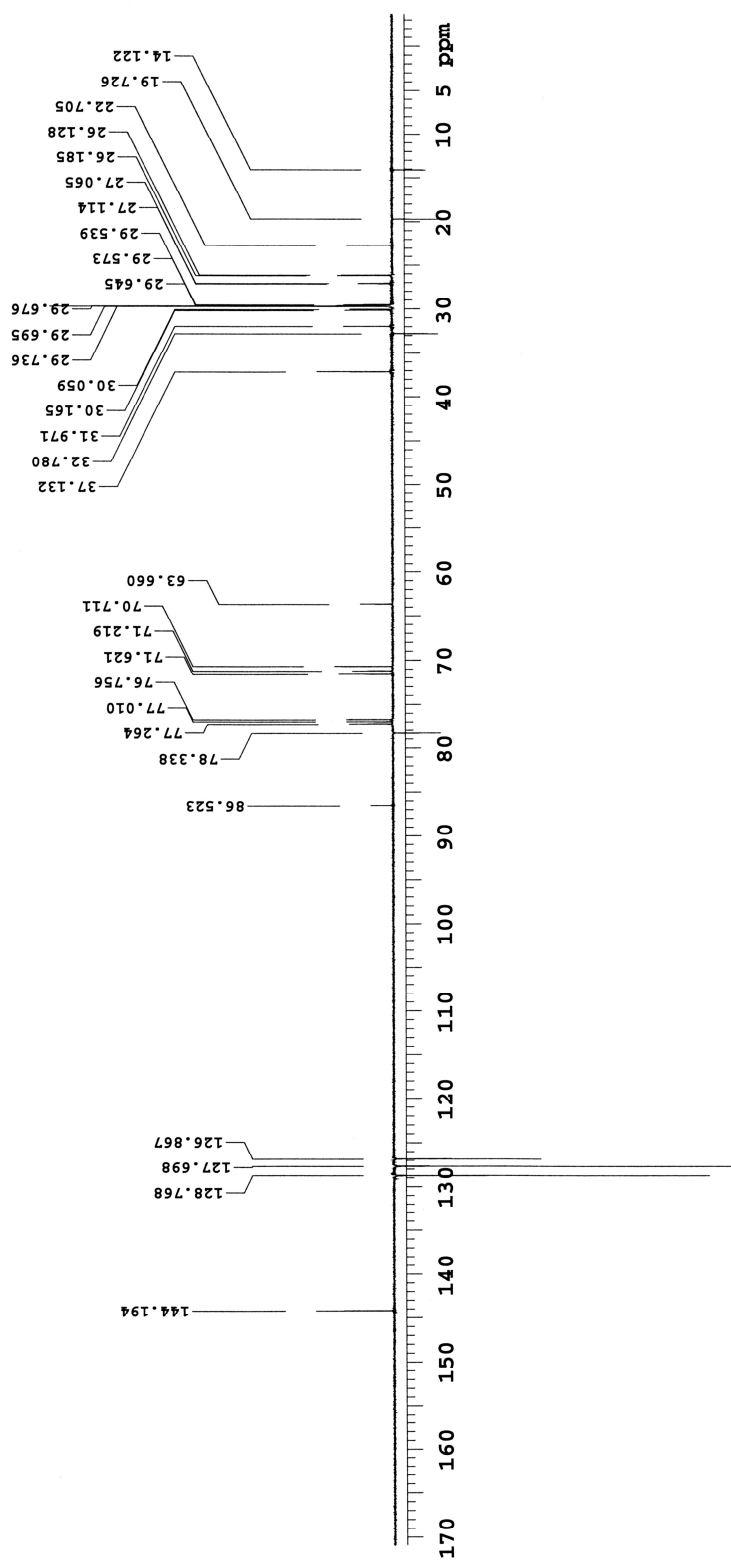

|                                                                                                                                                                               |                                                                                                                               |                                                                                               |                                                                                                                                      |
|-------------------------------------------------------------------------------------------------------------------------------------------------------------------------------|-------------------------------------------------------------------------------------------------------------------------------|-----------------------------------------------------------------------------------------------|--------------------------------------------------------------------------------------------------------------------------------------|
| <p>PULSE SEQUENCE: APT<br/>Relax. delay 1.000 sec<br/>1st pulse 90.0 degrees<br/>2nd pulse 45.0 degrees<br/>Acq. time 1.049 sec<br/>Width 31250.0 Hz<br/>5000 repetitions</p> | <p>OBSERVE C13, 125.6613841<br/>DECOUPLE H1, 499.7491051<br/>Power 40 dB<br/>on during acquisition<br/>WALTZ-16 modulated</p> | <p>DATA PROCESSING<br/>Line broadening 0.5 Hz<br/>FT size 131072<br/>Total time 2.8 hours</p> | <p>2013-10-25<br/>Drescher_5376-77<br/>186/a/1<br/><br/>Solvent: cdcl3<br/>Temp. 27.0 C / 300.1 K<br/>Sample #6, Operator: vnmr1</p> |
|-------------------------------------------------------------------------------------------------------------------------------------------------------------------------------|-------------------------------------------------------------------------------------------------------------------------------|-----------------------------------------------------------------------------------------------|--------------------------------------------------------------------------------------------------------------------------------------|

File: Drescher\_5376-77\_2013-10-25\_01/Drescher\_5376-77\_APT\_01

**Compound 26a** – monoalkylate side-product: ESI-MS, positive mode

$\text{C}_{93}\text{H}_{140}\text{O}_6\text{Na}$   $[\text{M} + \text{Na}]^+$  – 1376.05  $\text{g mol}^{-1}$

Service\186-af12-1

10/24/13 02:54:47

186/a Fr.12 1354,1

# 2 RT: 0.06 AV: 1 NL: 3.19E5

T: + c Full ms [ 50.00 - 2000.00]

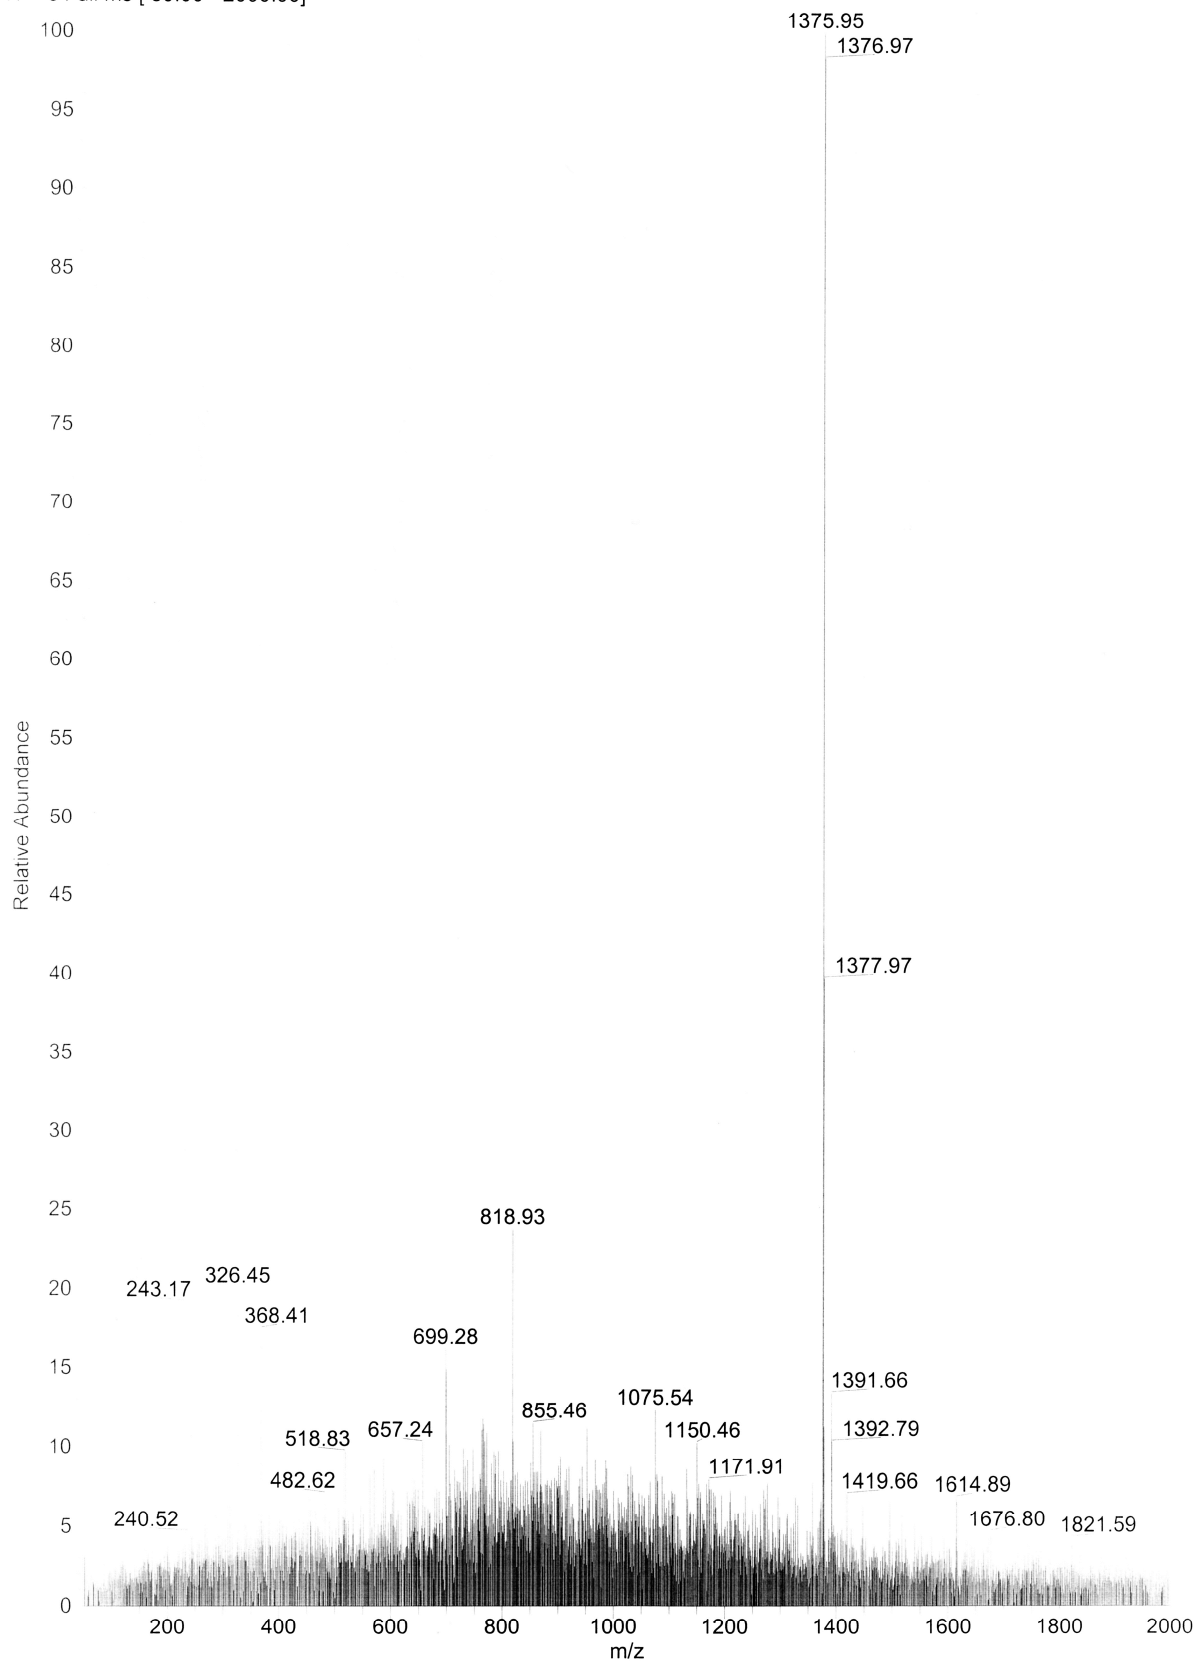

**Compound 26b: ESI-MS, positive mode**

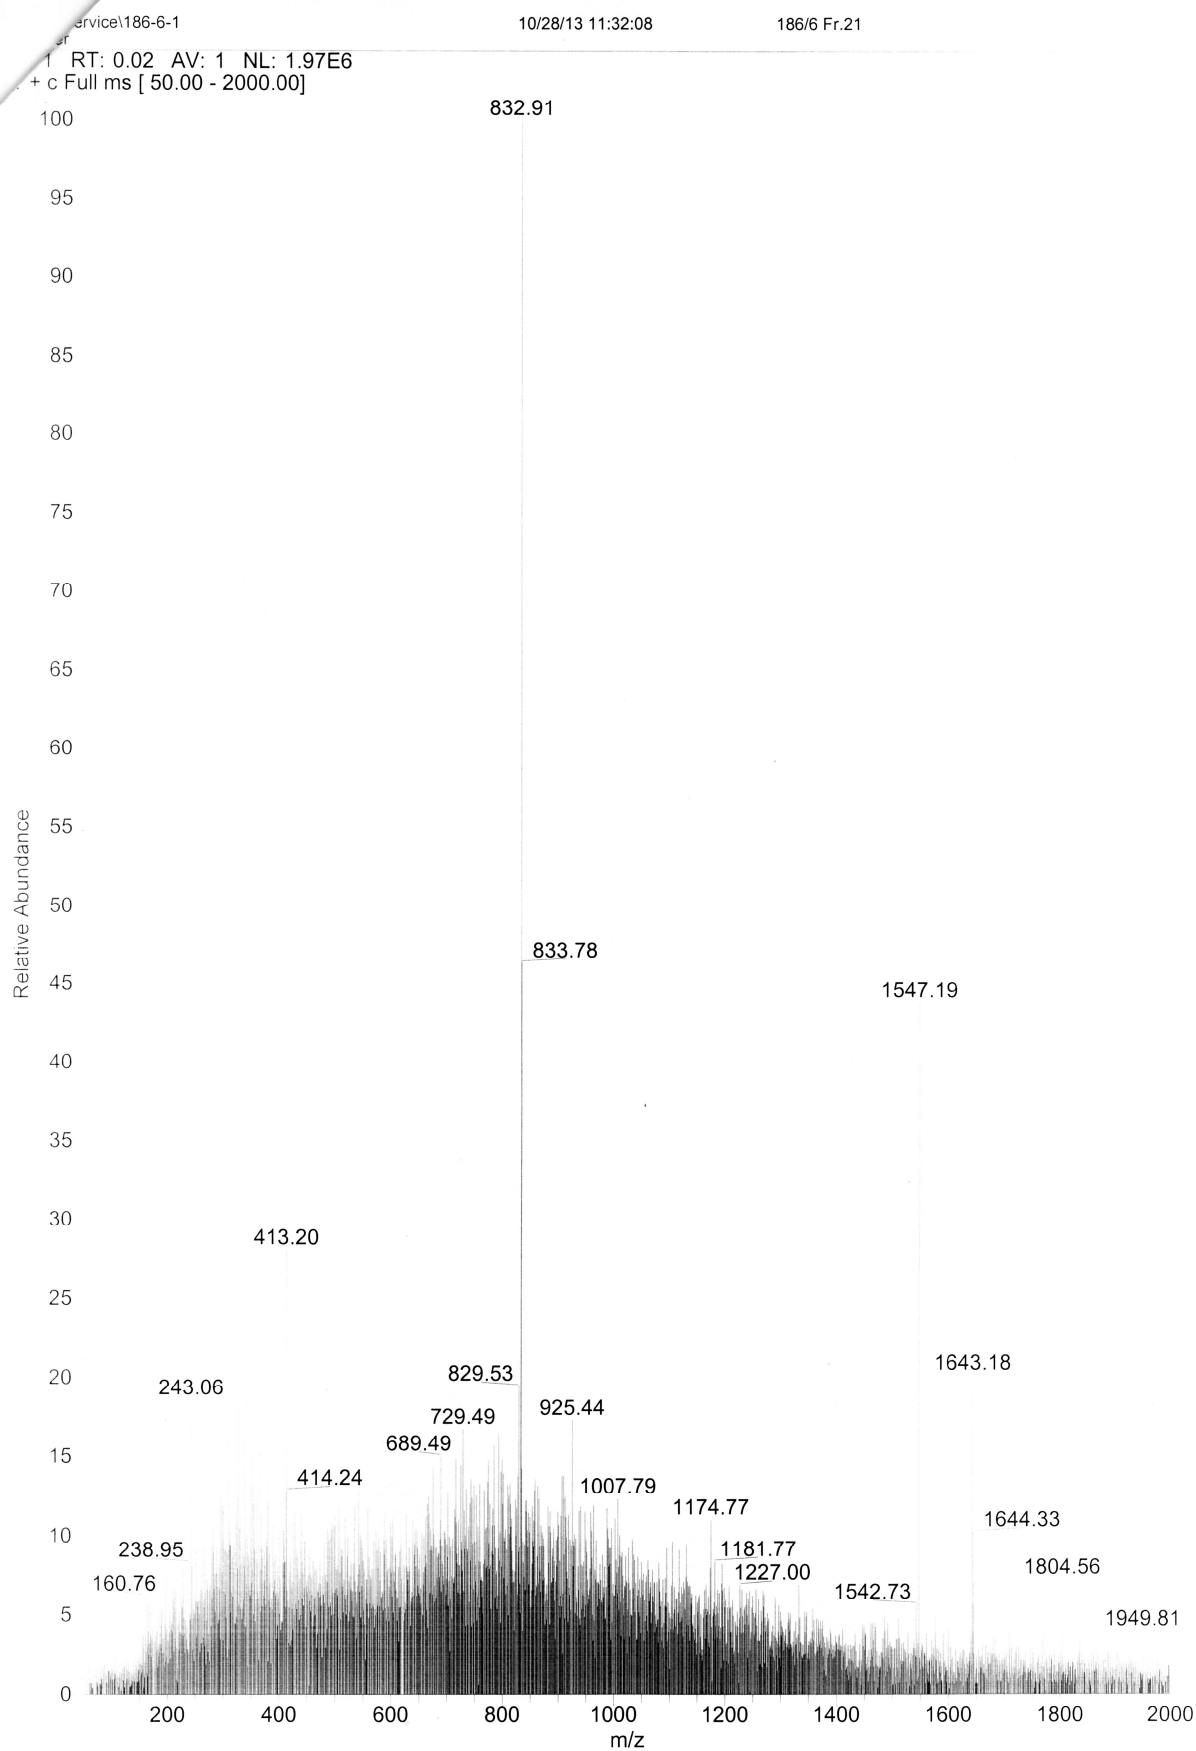

Compound 26b: <sup>1</sup>H NMR

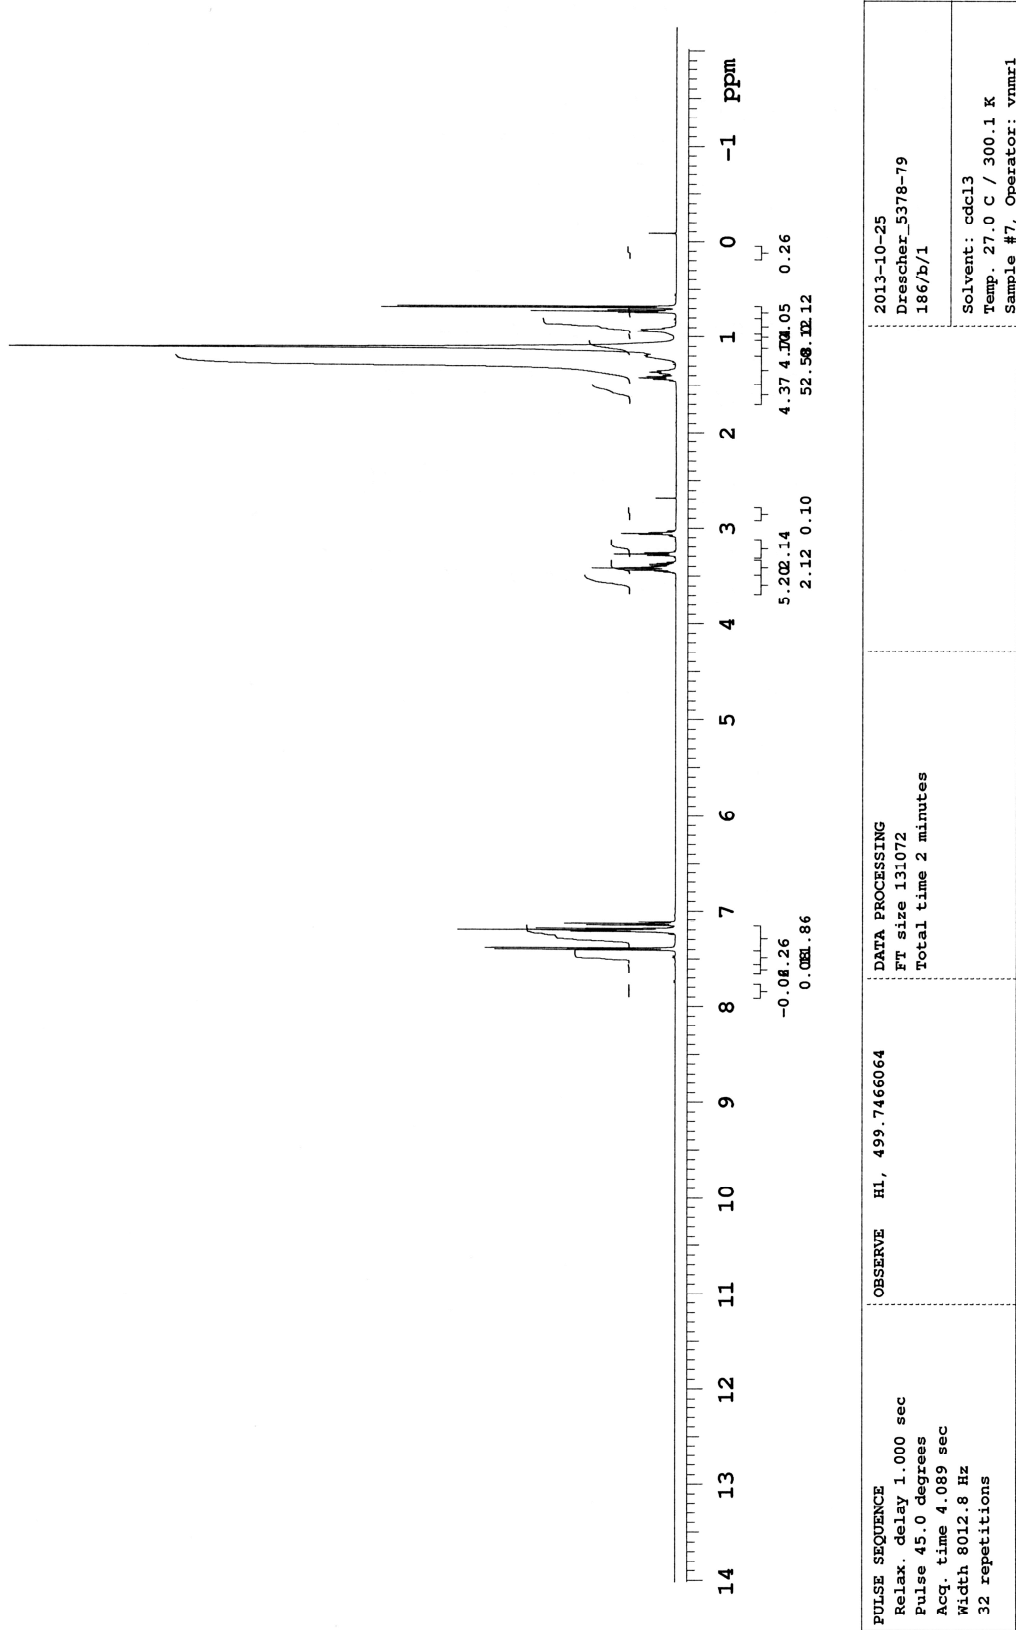

File: Drescher\_5378-79\_2013-10-25\_01/Drescher\_5378-79\_PROTON\_01

Compound 26b: <sup>13</sup>C NMR, APT mode

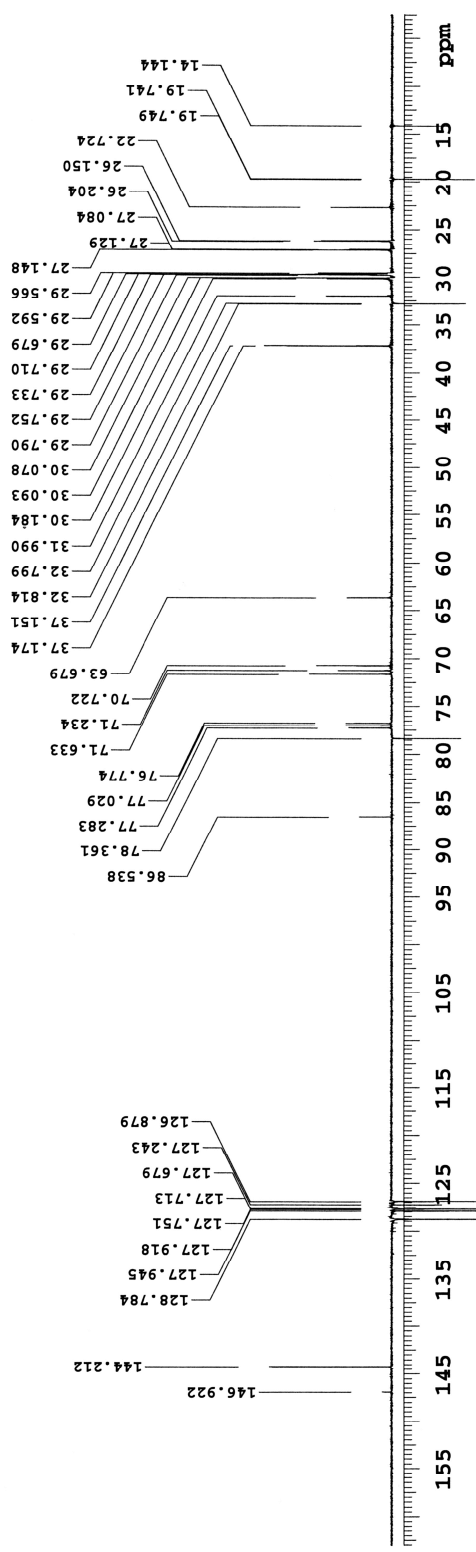

|                                                                                                                                                                         |                                                                                                                                  |                                                                                            |                                                                                                                         |
|-------------------------------------------------------------------------------------------------------------------------------------------------------------------------|----------------------------------------------------------------------------------------------------------------------------------|--------------------------------------------------------------------------------------------|-------------------------------------------------------------------------------------------------------------------------|
| <b>PULSE SEQUENCE: APT</b><br>Relax. delay 1.000 sec<br>1st pulse 90.0 degrees<br>2nd pulse 45.0 degrees<br>Acq. time 1.049 sec<br>Width 31250.0 Hz<br>5000 repetitions | <b>OBSERVE</b> C13, 125.6613841<br><b>DECOUPLE</b> H1, 499.7491051<br>Power 40 dB<br>on during acquisition<br>WALTZ-16 modulated | <b>DATA PROCESSING</b><br>Line broadening 0.5 Hz<br>FT size 131072<br>Total time 2.8 hours | 2013-10-25<br>Drescher_5378-79<br>186/b/1<br><br>Solvent: cdcl3<br>Temp. 27.0 C / 300.1 K<br>Sample #7, Operator: vnmr1 |
|-------------------------------------------------------------------------------------------------------------------------------------------------------------------------|----------------------------------------------------------------------------------------------------------------------------------|--------------------------------------------------------------------------------------------|-------------------------------------------------------------------------------------------------------------------------|

File: Drescher\_5378-79\_2013-10-25\_01/Drescher\_5378-79\_APT\_01



$$\text{C}_{95}\text{H}_{144}\text{O}_6\text{Na} [\text{M} + \text{Na}]^+ - 1404.08 \text{ g mol}^{-1}$$
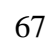

# Lipid I: <sup>1</sup>H NMR

Markowski  
TM-OR-D  
Nr. 583

Pulse Sequence: zgpg30

Solvent: CDCl<sub>3</sub>

Temp: 40.0 C / 313.1 K

QNP-135 "Jamps"

Relax. delay 2.000 sec

Pulse 52.2 degrees

Acc. time 2.502 sec

Width 6789.3 Hz

32 repetitions

OBSERVE F1: 399.9571183 MHz

DATA PROCESSING

FT: 812.1359611

Total time 2 min, 43 sec

HEIGHT INDEX FREQUENCY PPM HEIGHT

| INDEX | FREQUENCY | PPM   | HEIGHT |
|-------|-----------|-------|--------|
| 1     | 2894.218  | 7.236 | 13.3   |
| 2     | 1586.545  | 4.217 | 2.2    |
| 3     | 1542.122  | 3.855 | 2.6    |
| 4     | 1536.520  | 3.842 | 4.8    |
| 5     | 1530.917  | 3.828 | 2.8    |
| 6     | 1438.123  | 3.621 | 2.9    |
| 7     | 1433.551  | 3.609 | 3.1    |
| 8     | 1432.993  | 3.598 | 2.8    |
| 9     | 1427.373  | 3.569 | 1.2    |
| 10    | 1423.015  | 3.558 | 1.7    |
| 11    | 1418.035  | 3.545 | 2.2    |
| 12    | 1408.905  | 3.523 | 3.6    |
| 13    | 1401.850  | 3.505 | 3.5    |
| 14    | 1386.247  | 3.491 | 2.8    |
| 15    | 1382.305  | 3.481 | 2.7    |
| 16    | 1372.582  | 3.432 | 2.2    |
| 17    | 1356.863  | 3.418 | 2.0    |
| 18    | 1352.217  | 3.405 | 1.4    |
| 19    | 1356.614  | 3.392 | 2.8    |
| 20    | 1350.182  | 3.376 | 3.4    |
| 21    | 1348.106  | 3.371 | 3.4    |
| 22    | 1343.334  | 3.359 | 4.8    |
| 23    | 1341.259  | 3.354 | 2.1    |
| 24    | 1338.551  | 3.347 | 1.4    |
| 25    | 1281.705  | 3.205 | 53.5   |
| 26    | 843.458   | 2.108 | 8.7    |
| 27    | 593.641   | 1.489 | 2.8    |
| 28    | 593.258   | 1.483 | 4.2    |
| 29    | 586.583   | 1.463 | 3.2    |
| 30    | 483.231   | 1.268 | 151.2  |
| 31    | 464.141   | 1.180 | 2.5    |
| 32    | 446.371   | 1.121 | 3.5    |
| 33    | 415.170   | 1.058 | 1.8    |
| 34    | 408.115   | 1.050 | 1.4    |
| 35    | 355.186   | 0.946 | 3.2    |
| 36    | 331.754   | 0.829 | 7.8    |
| 37    | 324.689   | 0.812 | 8.5    |
| 38    | 317.421   | 0.793 | 11.0   |
| 39    | 310.381   | 0.775 | 16.1   |

ppm

1.68

2

1

Lipid I: <sup>13</sup>C NMR

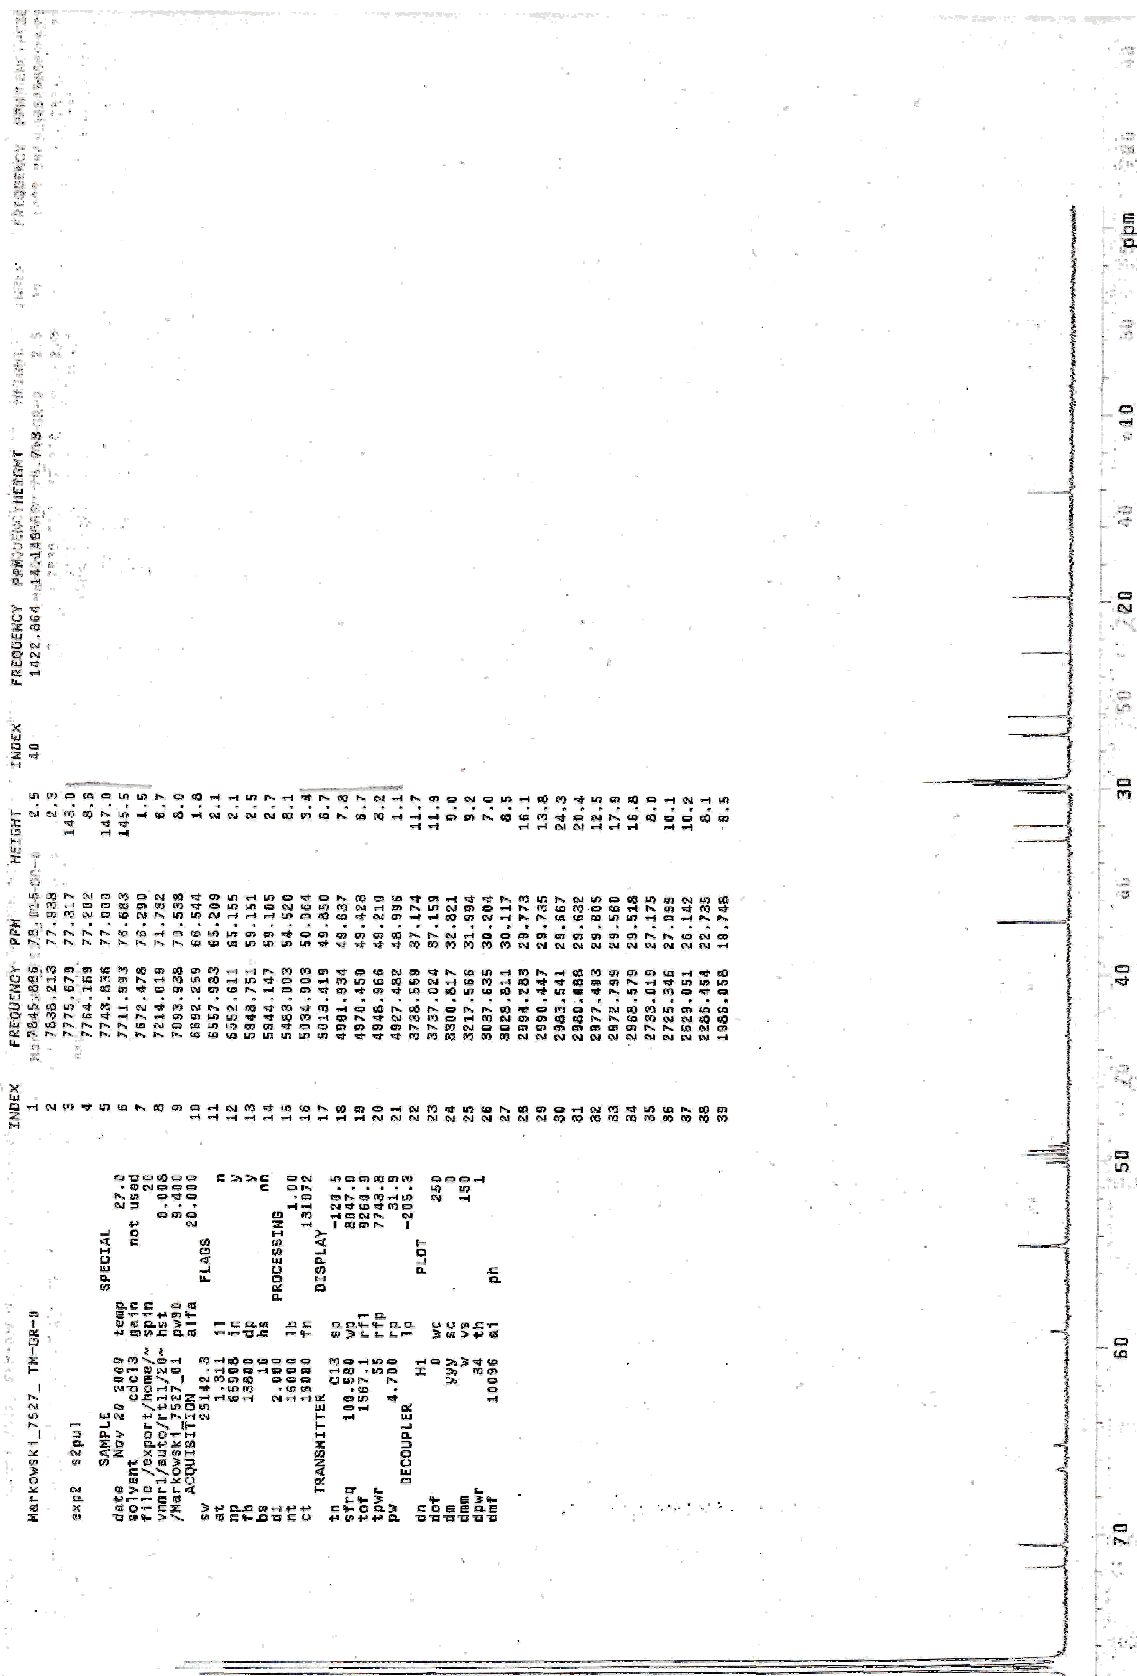

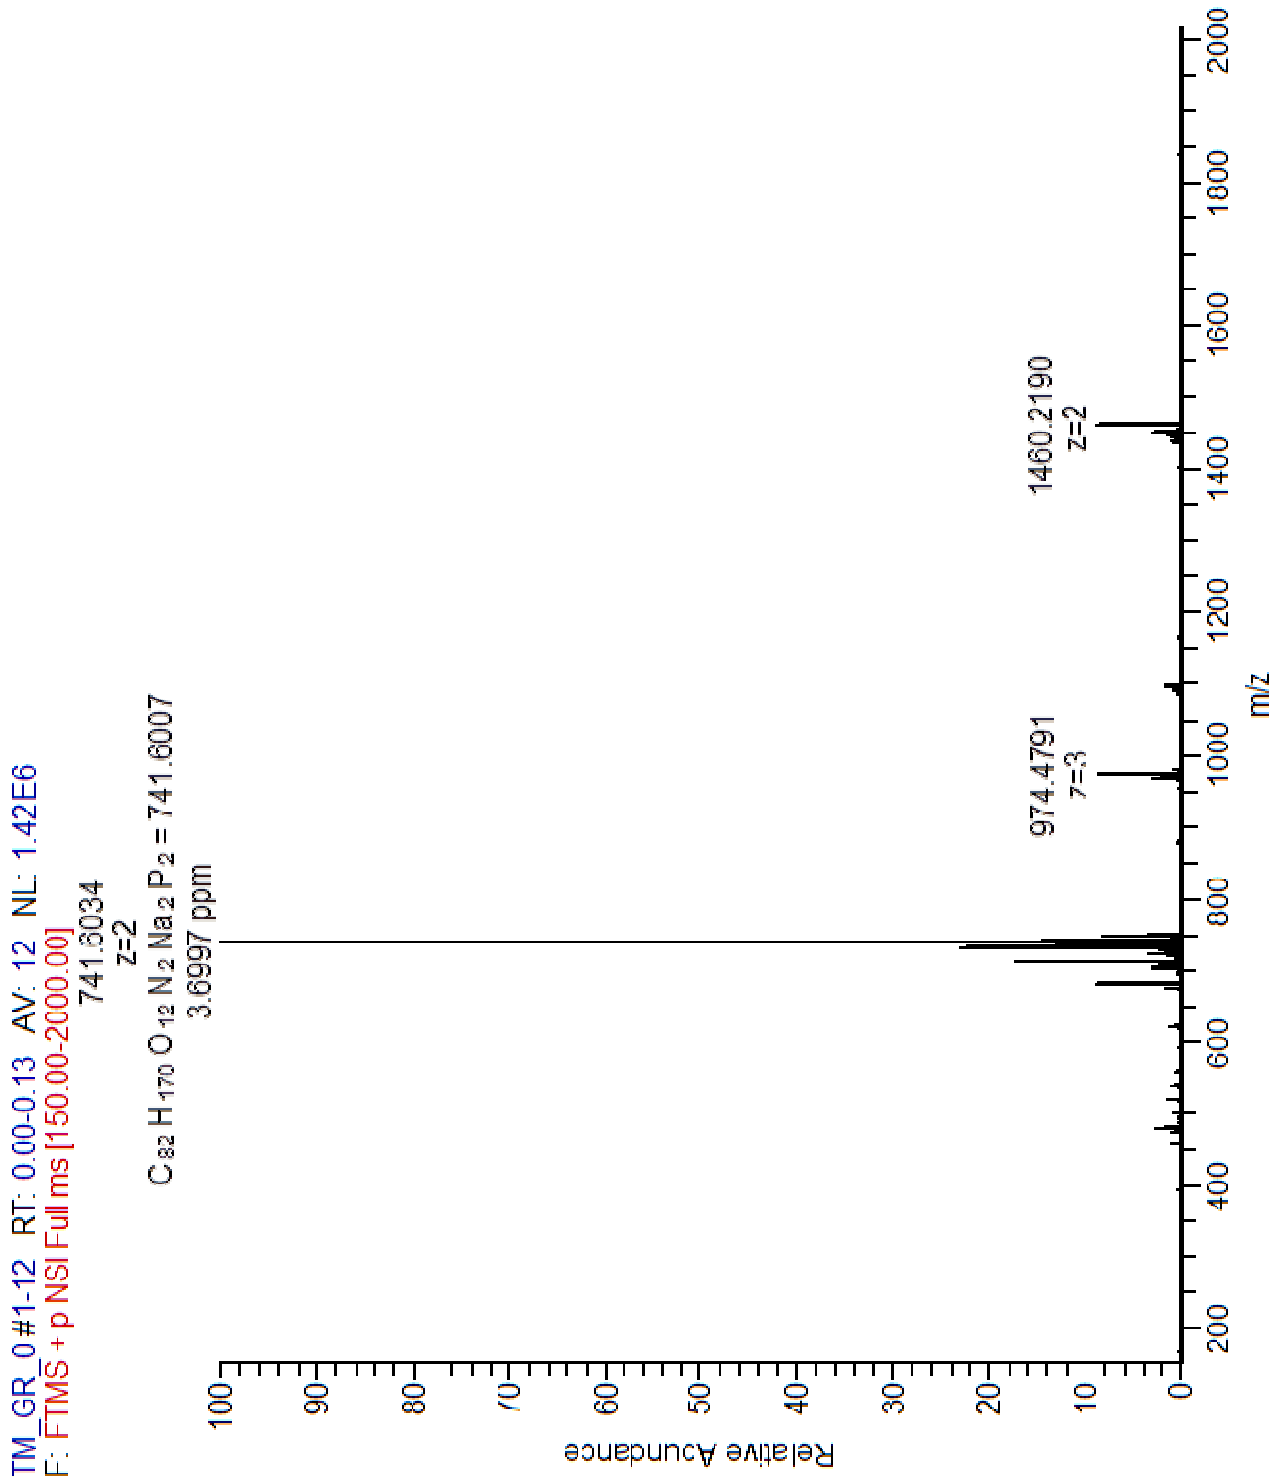

# Lipid II: <sup>1</sup>H NMR

MacKowski\_7262\_17-08-9

INDEX: 2594.758 7.127 132.7

Archive directory: /export/home/vnmr1/vnmrsvs/data: 2594.754 7.128 2.6  
Sample directory: auto\_10Mv2019 3 1992.303 4.981 -3.2

Pulse Sequence: s2pu1

Solvent: cdcl3  
Temp: 27.3 C / 300.1 K  
File: MacKowski\_7262\_01  
GEMINI-300EB 17ampm

Relax. delay 2.000 sec  
Pulse 45.0 degrees  
Acq. time 2.682 sec  
Width 6789.3 Hz  
256 repetitions  
OBS. FREQ 300.13571183 MHz  
NUC1: 1H  
Line broadening 0.3 Hz  
FT size 65536  
Total time 2 min, 43 sec

|    |          |       |       |
|----|----------|-------|-------|
| 4  | 1654.368 | 4.211 | 9.8   |
| 5  | 1637.965 | 3.845 | 4.3   |
| 6  | 1428.253 | 3.574 | 5.1   |
| 7  | 1419.086 | 3.546 | 3.5   |
| 8  | 1414.186 | 3.536 | 2.9   |
| 9  | 1409.383 | 3.524 | 3.2   |
| 10 | 1402.485 | 3.507 | 3.8   |
| 11 | 1395.430 | 3.488 | 6.8   |
| 12 | 1368.583 | 3.472 | 5.4   |
| 13 | 1367.417 | 3.418 | 3.4   |
| 14 | 1361.515 | 3.485 | 2.9   |
| 15 | 1357.042 | 3.393 | 2.4   |
| 16 | 1351.232 | 3.378 | 3.9   |
| 17 | 1342.724 | 3.357 | 5.4   |
| 18 | 1335.877 | 3.340 | 3.3   |
| 19 | 1331.934 | 3.330 | 5.3   |
| 20 | 1329.274 | 3.326 | 9.3   |
| 21 | 1328.514 | 3.322 | 13.5  |
| 22 | 1326.554 | 3.318 | 10.2  |
| 23 | 1325.294 | 3.314 | 5.4   |
| 24 | 1317.819 | 3.170 | 84.9  |
| 25 | 1248.518 | 3.132 | 1.8   |
| 26 | 1091.438 | 2.739 | 34.4  |
| 27 | 1068.157 | 2.671 | 24.6  |
| 28 | 956.959  | 1.483 | 9.4   |
| 29 | 478.482  | 1.164 | 151.2 |
| 30 | 405.431  | 1.014 | 3.0   |
| 31 | 323.889  | 0.825 | 5.4   |
| 32 | 323.467  | 0.809 | 15.1  |
| 33 | 316.412  | 0.791 | 6.7   |
| 34 | 308.341  | 0.772 | 15.6  |
| 35 | 302.509  | 0.756 | 13.7  |

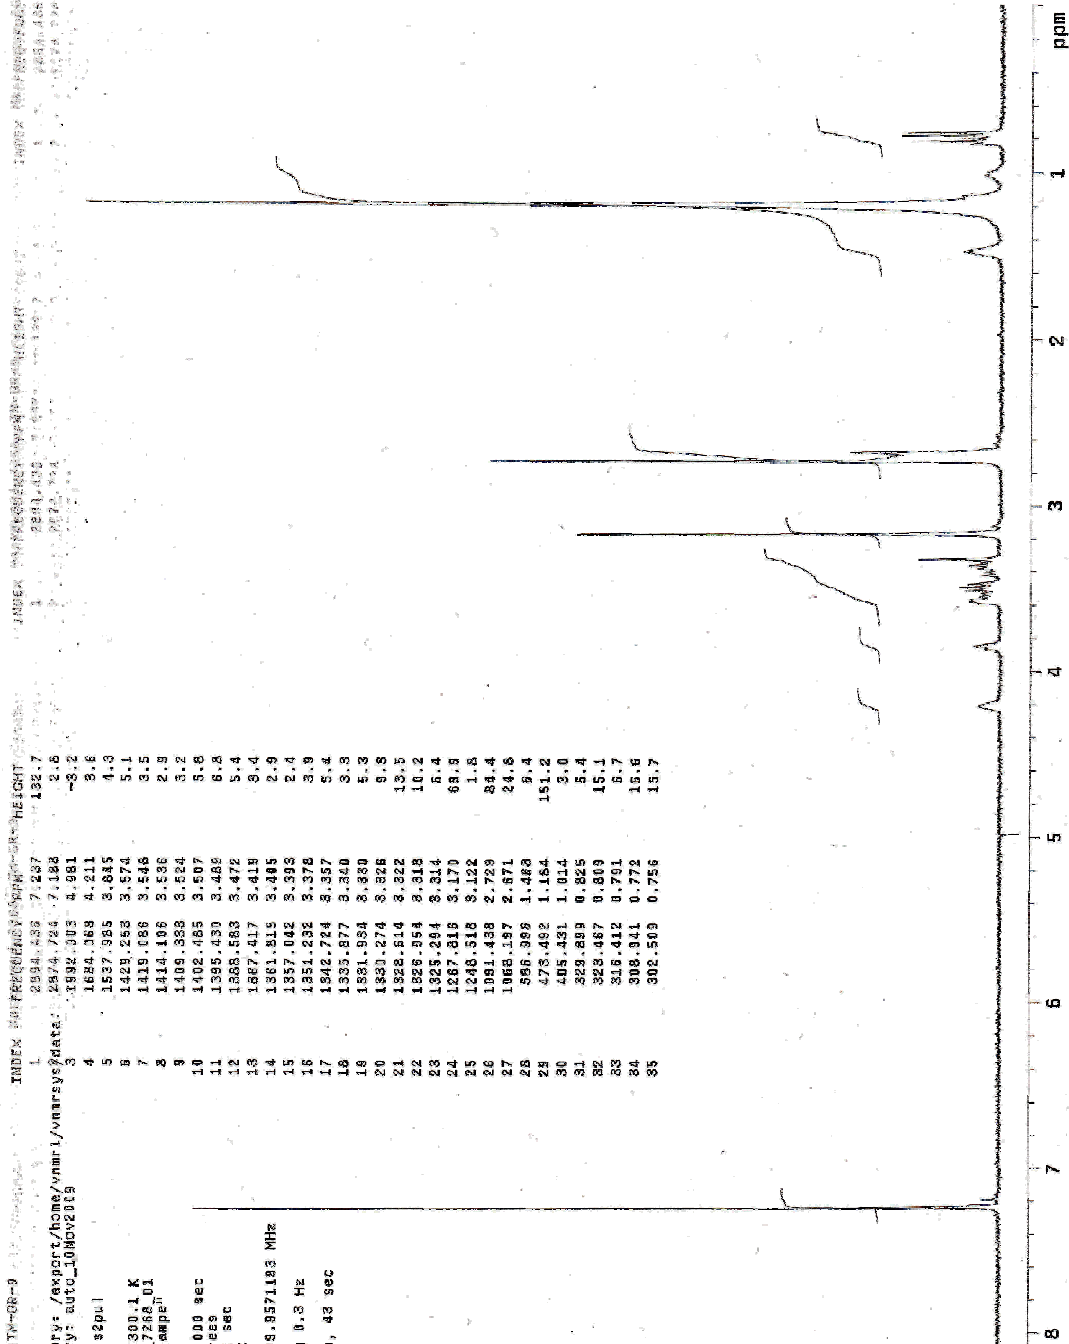

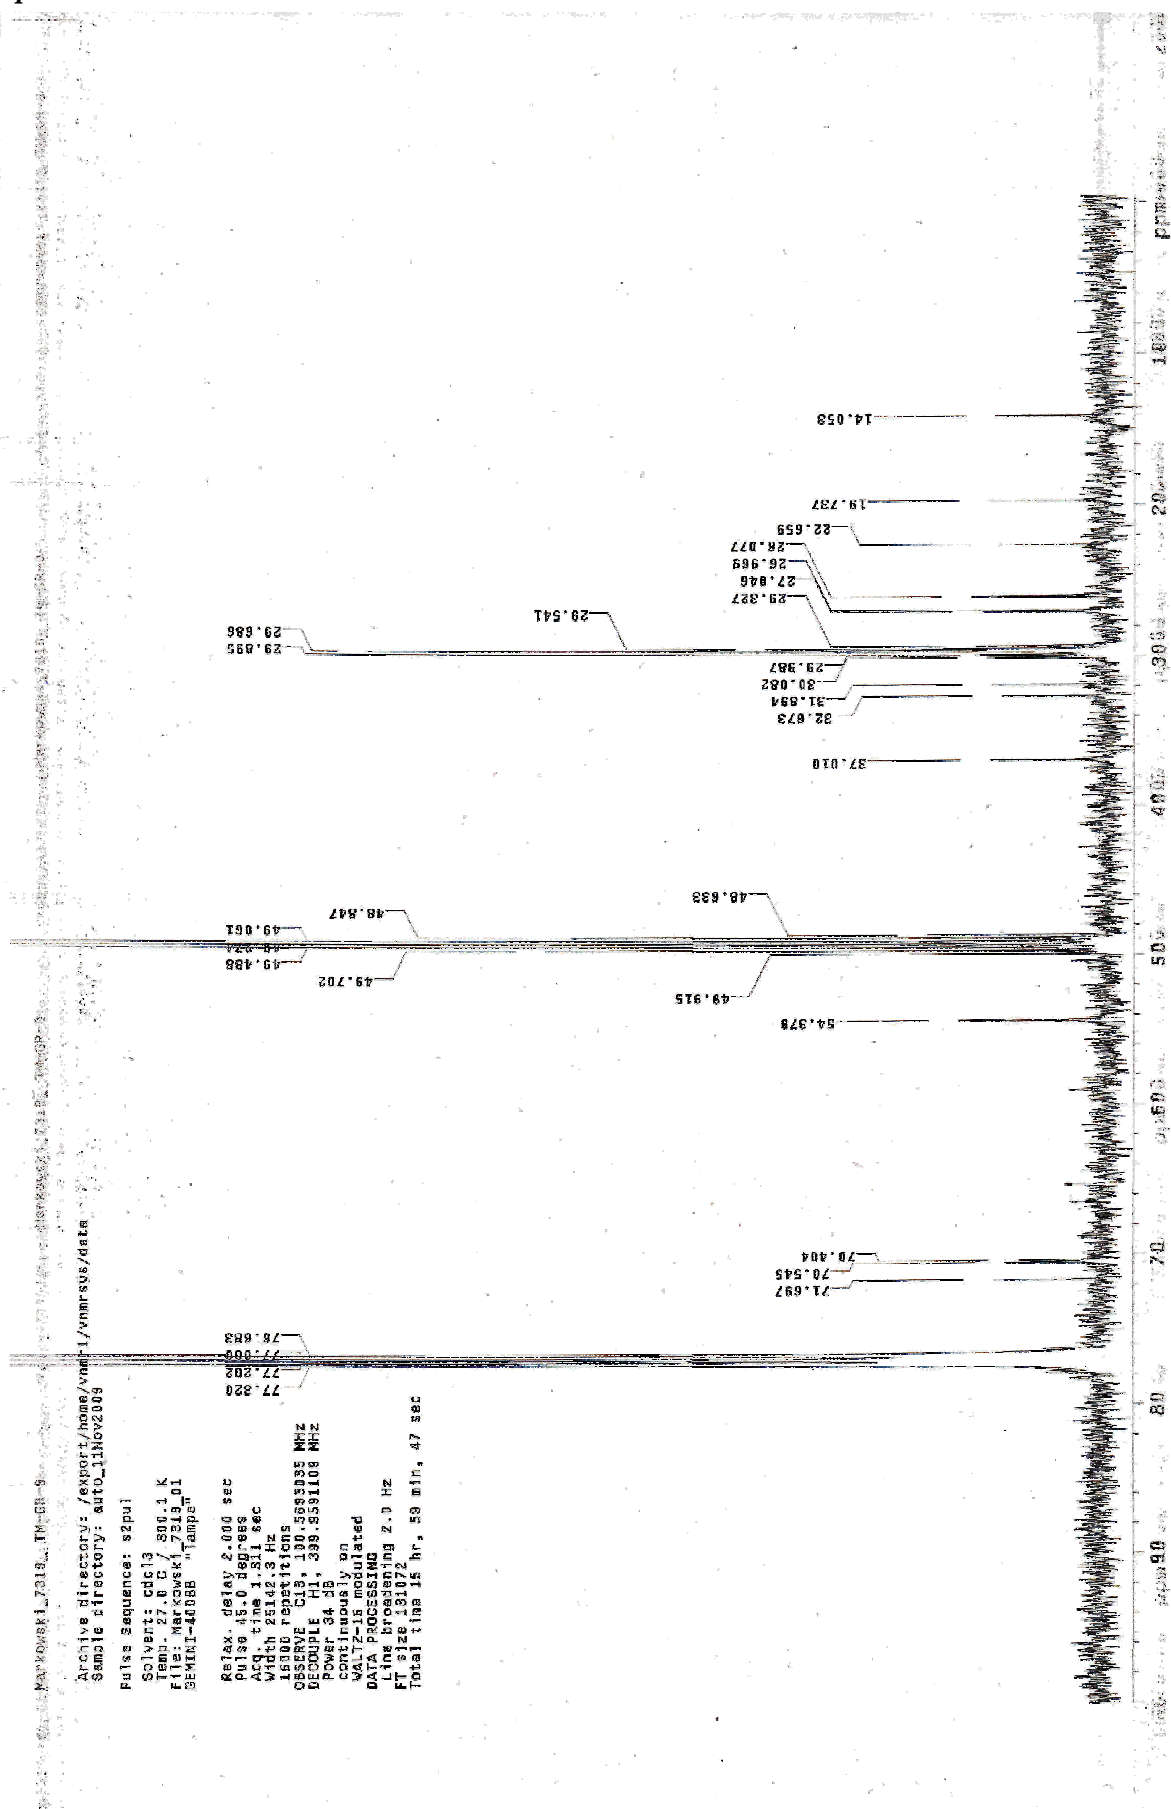

**Lipid II: ESI-MS, positive mode**

D:\Daten\service\lm-gr-9-1  
Markowski

11/26/09 10:32:55

TM-GR-9 - 1438.18

lm-gr-9-1#1 RT: 0.01 AV: 1 NL: 1.64E7

T: + c Full ms [ 50.00-2000.00]

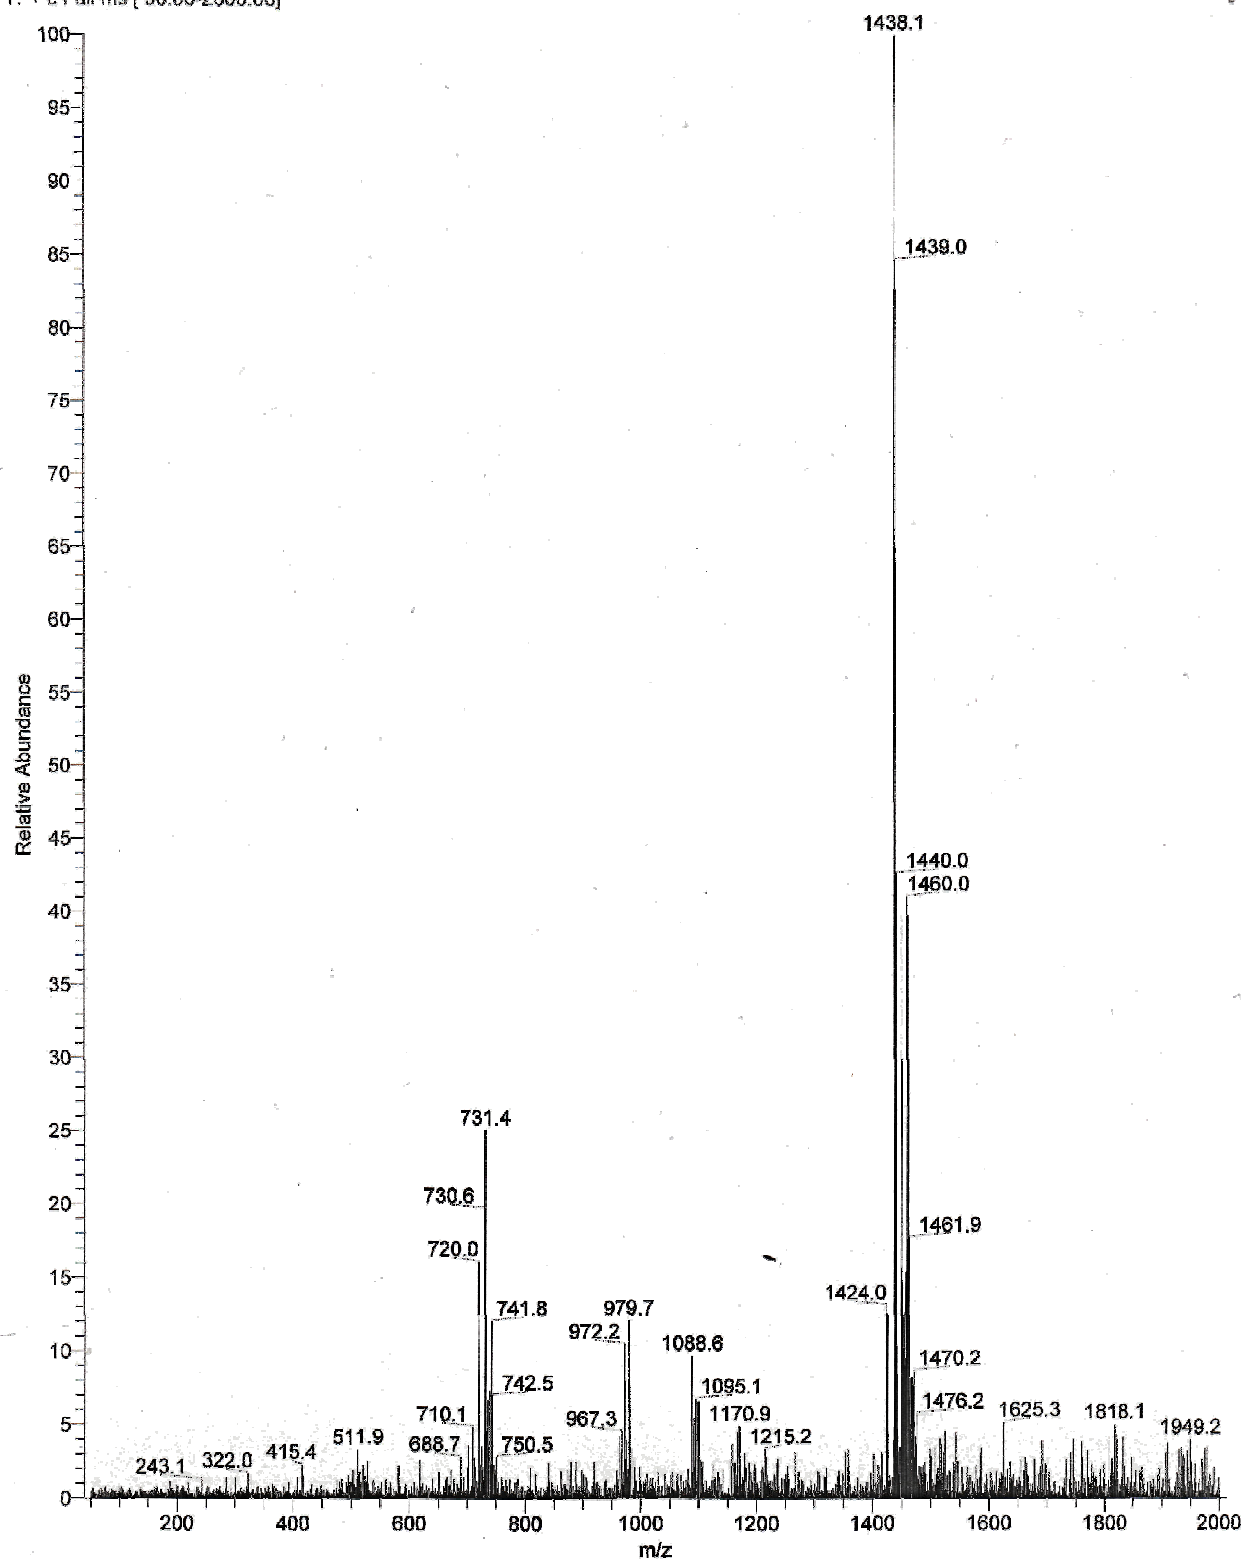

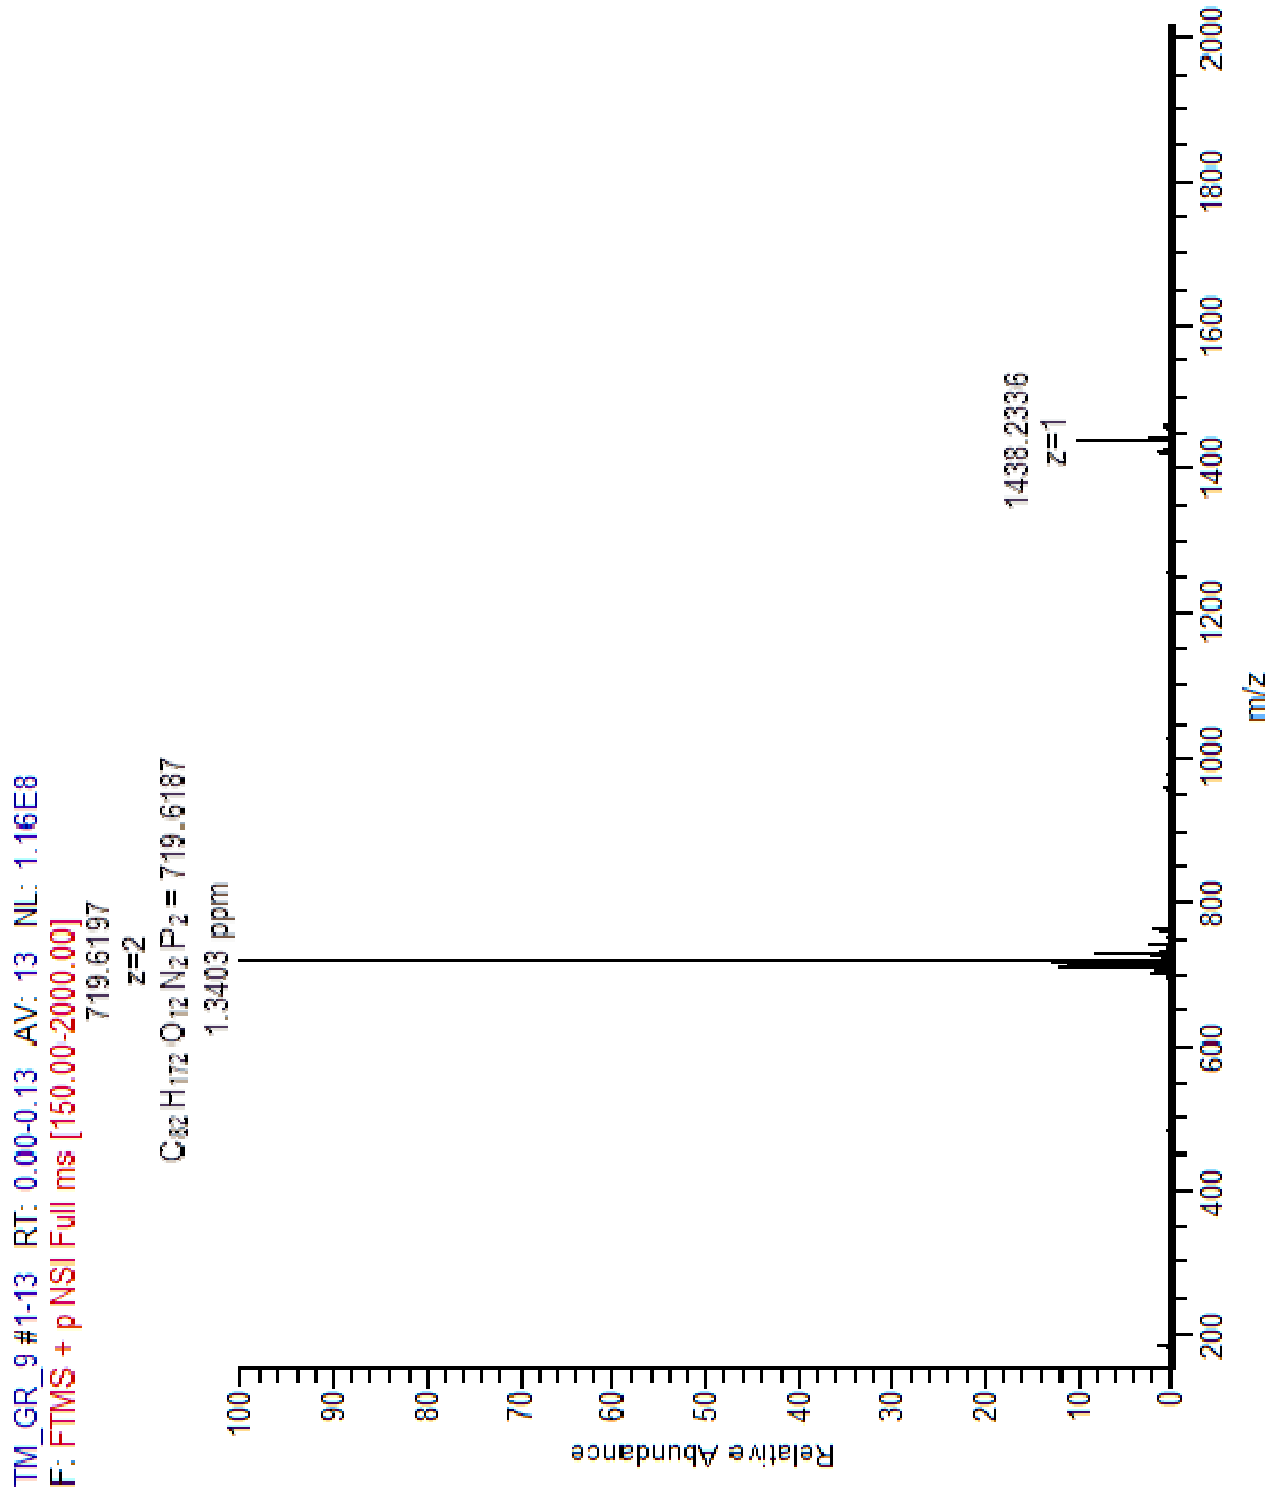



Lipid III:  $^1\text{H}$  NMR

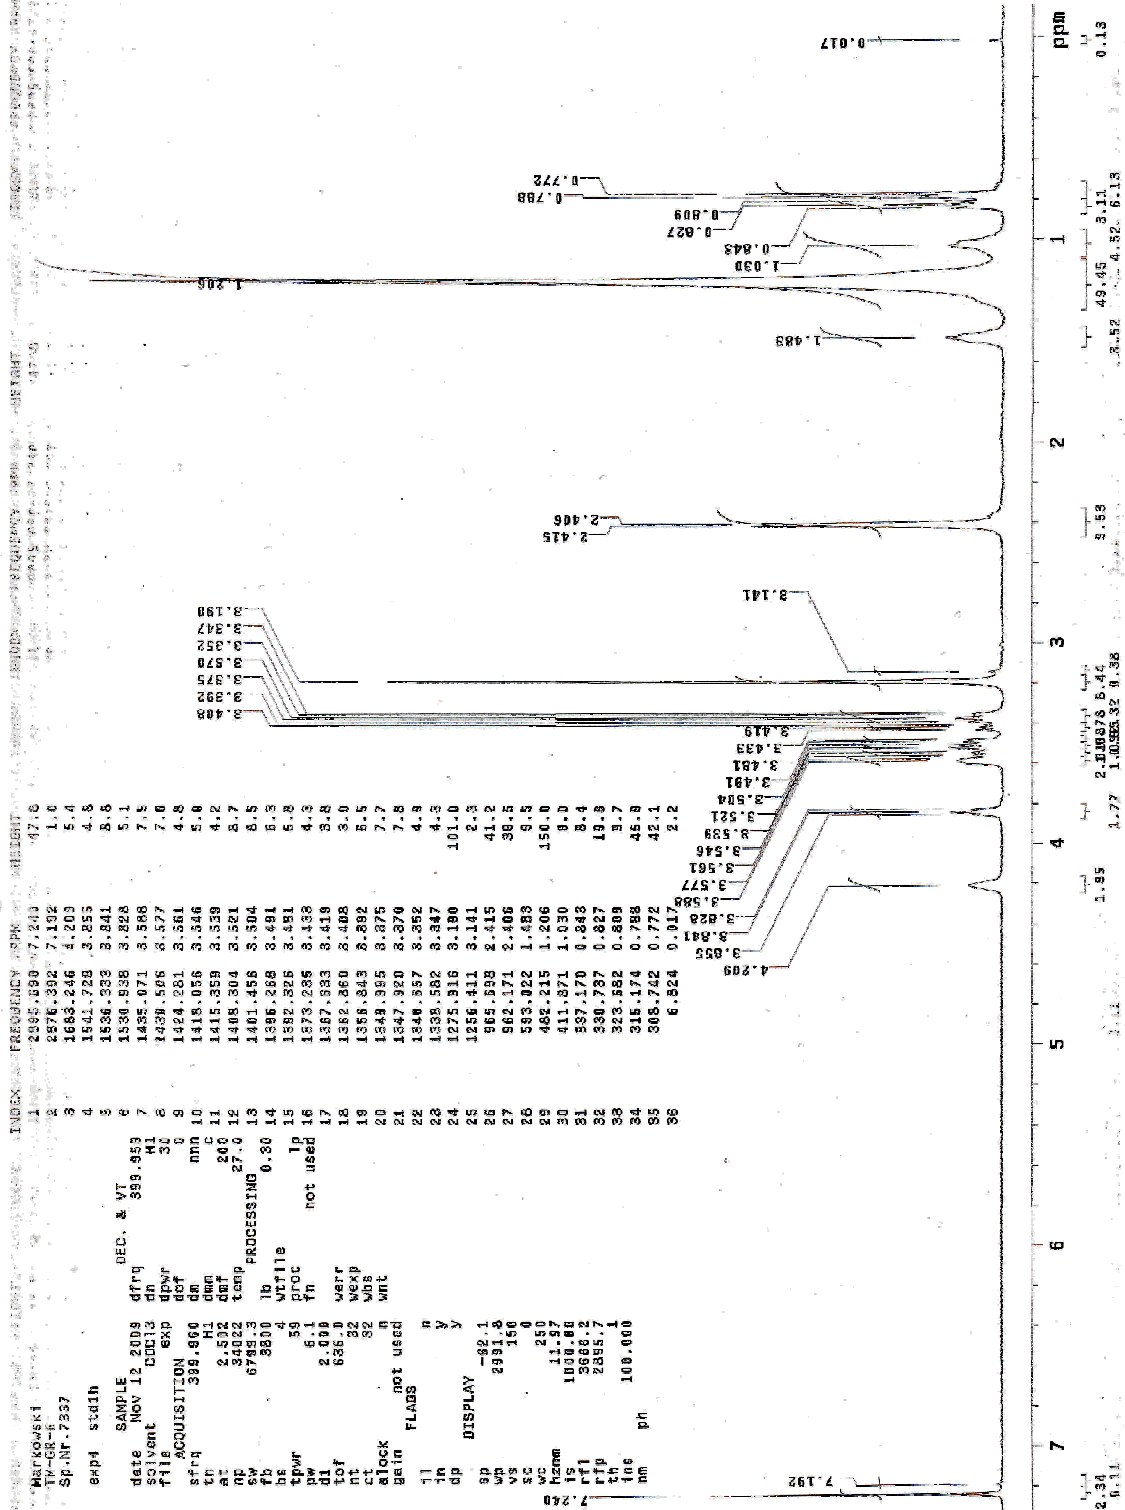

# Lipid III: $^{13}\text{C}$ NMR

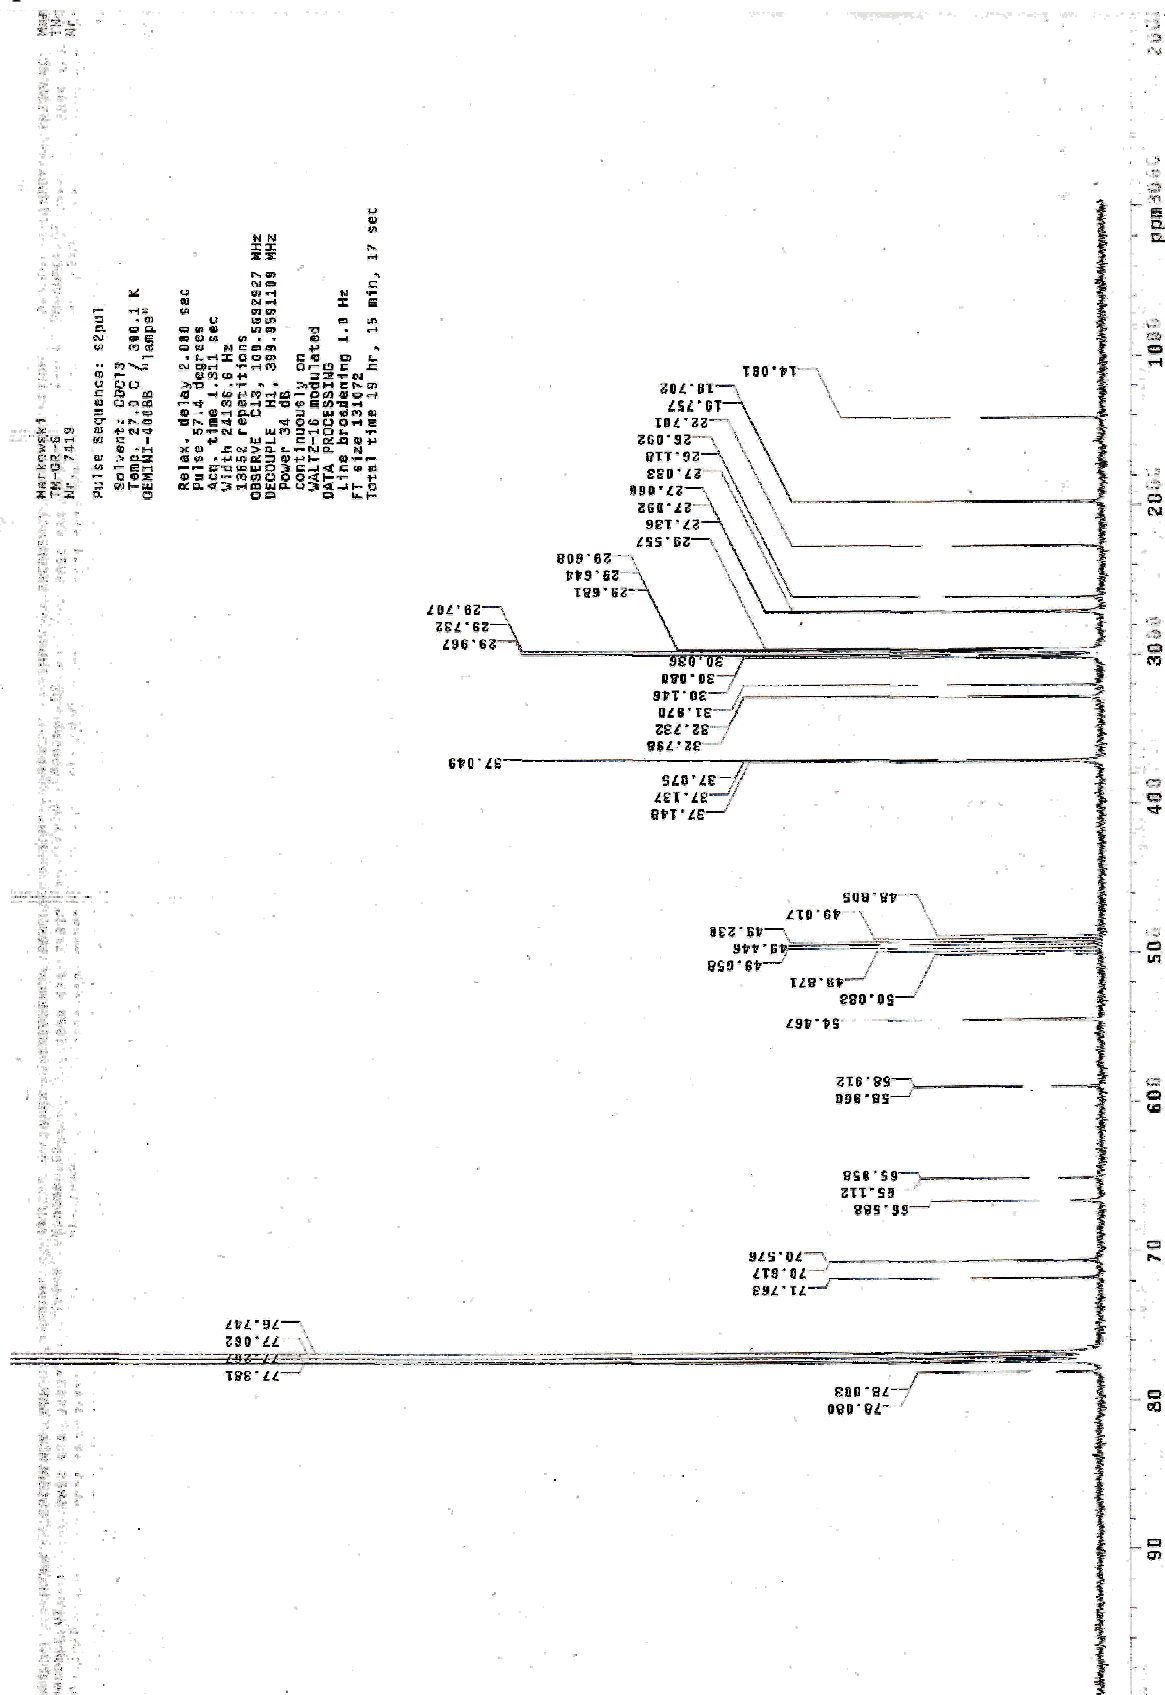

*Lipid III: ESI-MS, positive mode*

D:\Data\Service\m-gr-6-1  
Markowski

08/18/09 02:07:47 PM

TM-GR-6 - 1466.2

S#: 1 RT: 0.03 AV: 1 NL: 1.61E7  
T: + c Full ms [ 50.00 - 2000.00]

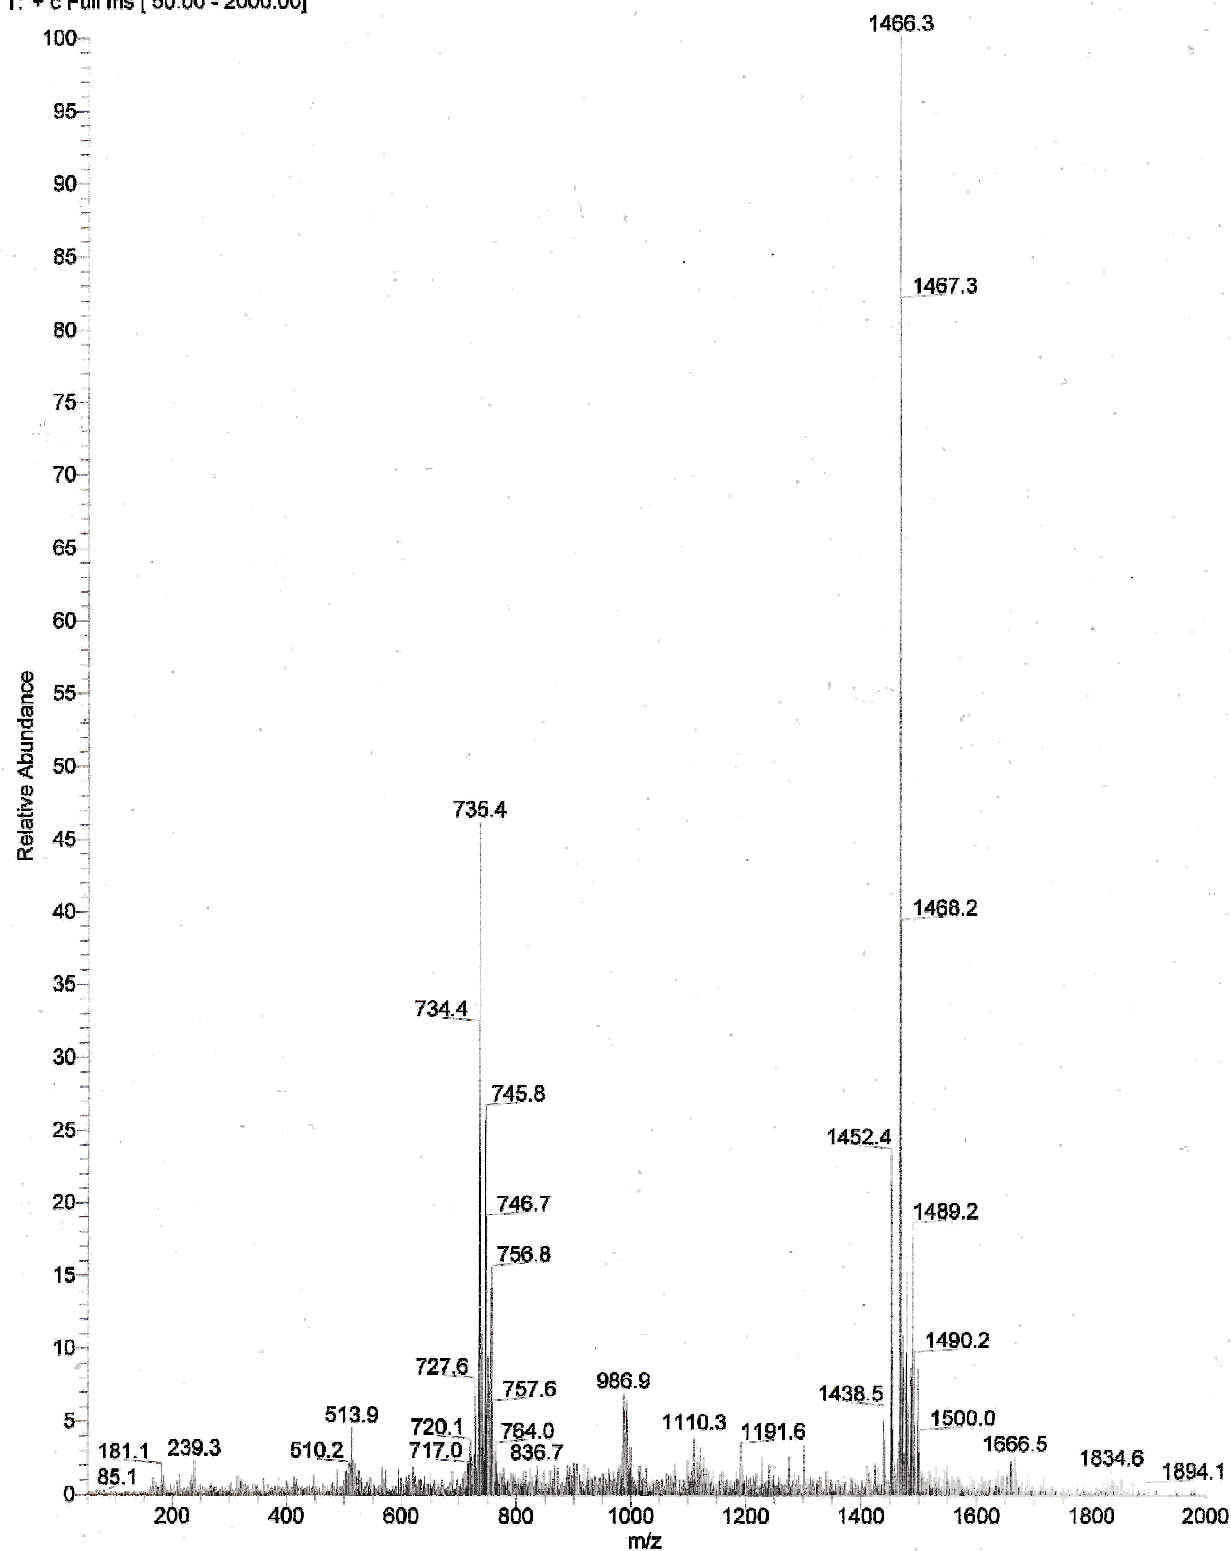

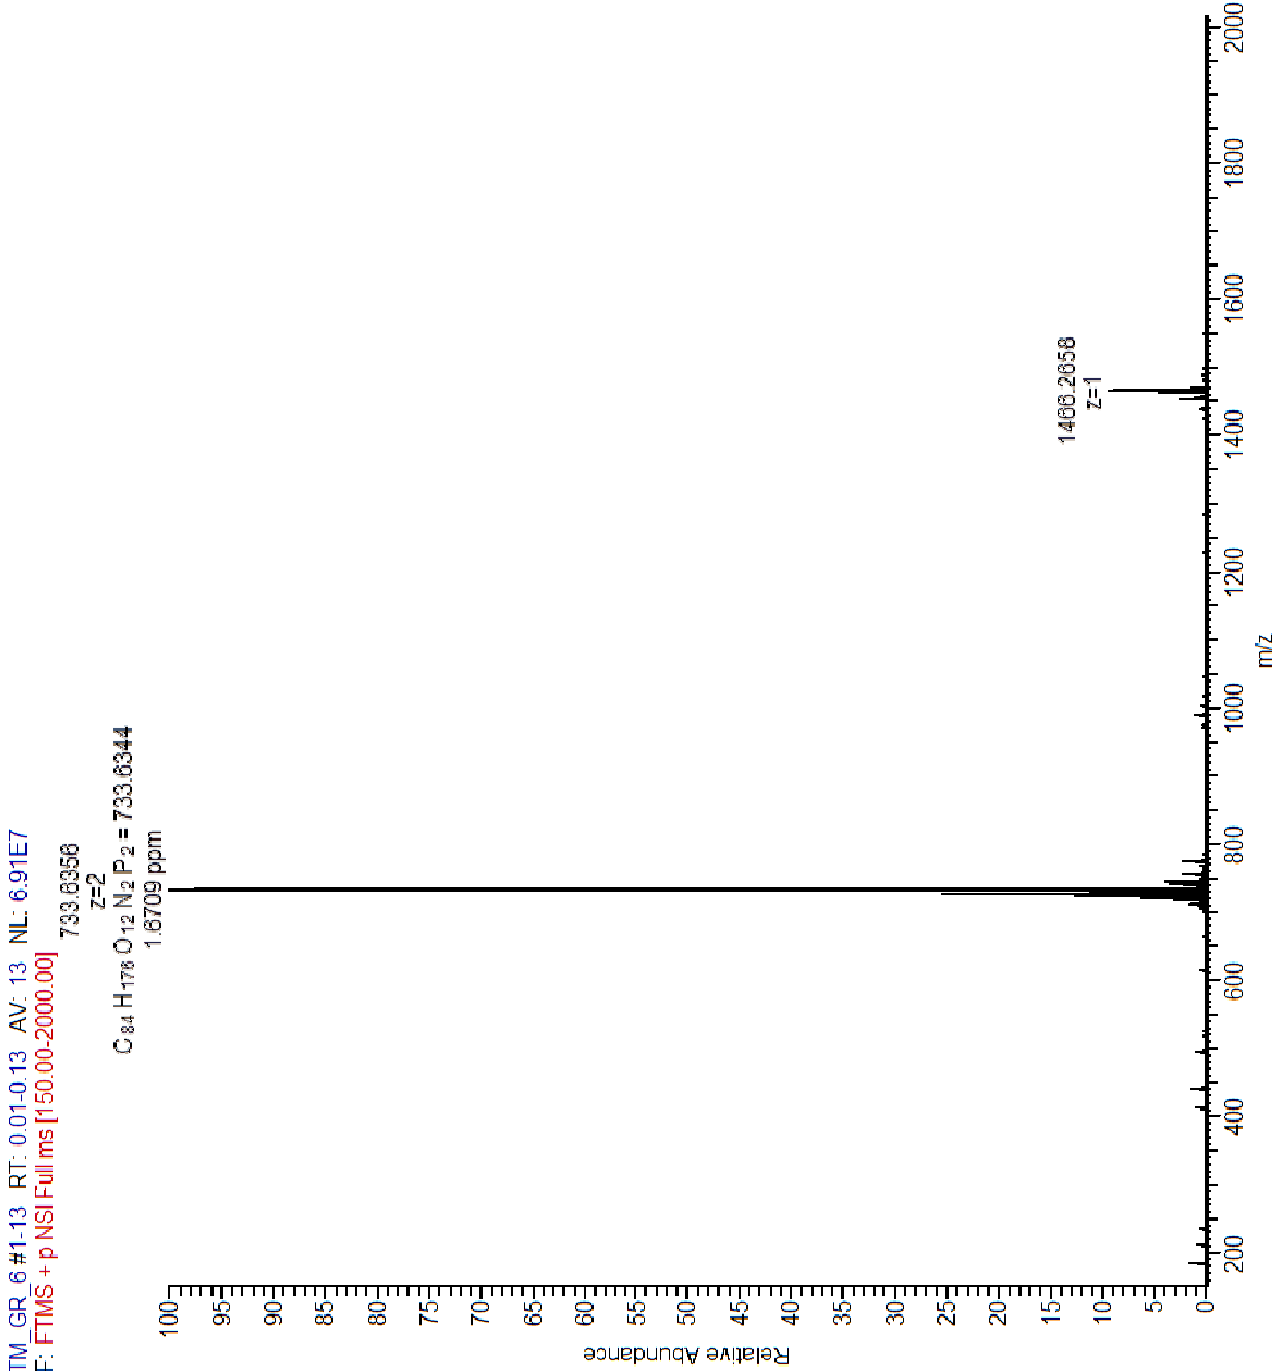

## 5. References

1. A. D. Bangham, M. M. Standish and J. C. Watkins, *J. Mol. Biol.*, 1965, **13**, 238-252.
2. J. Cason, K. L. Rinehart Jr. and S. D. Thornton Jr., *J. Org. Chem.*, 1953, **18**, 1594-1600.
3. B. Dobner, B. Elsner and P. Nuhn, *Pharmazie*, 1989, **44**, 758-760.
4. M. Okano, *Chem. Lett.*, 1973, 165-170.
5. S. Silver, A. Puranen, R. Sjöholm, T. Repo and R. Leino, *Eur. J. Inorg. Chem.*, 2005, 1514-1529.
6. T. Markowski, S. Drescher, A. Meister, G. Hause, A. Blume and B. Dobner, *Eur. J. Org. Chem.*, 2011, 5894-5904.
